# Supplementary material for: Ancient polymorphisms and divergence hitchhiking contribute to genomic islands of divergence within a poplar species complex
Source: PubMed Central journal article supplement — Proc Natl Acad Sci U S A. 2017 Dec 26;115(2):E236–43. doi: 10.1073/pnas.1713288114 (PMC5777044; doi:10.1073/pnas.1713288114), 2017-12-26
Supplement: pnas.1713288114.sapp.pdf [file pnas.1713288114.sapp.pdf]

1 **SI Appendix**

2 **Ancient polymorphisms and divergence hitchhiking contribute to**  
3 **genomic islands of divergence within a poplar species complex**

4

5 Tao Ma<sup>a,1</sup>, Kun Wang<sup>a,1</sup>, Quanjun Hu<sup>a,1</sup>, Zhenxiang Xi<sup>a,1</sup>, Dongshi Wan<sup>b</sup>, Qian Wang<sup>a</sup>, Jianju Feng<sup>b</sup>,  
6 Dechun Jiang<sup>b</sup>, Hamid Ahani<sup>c</sup>, Richard J. Abbott<sup>d</sup>, Martin Lascoux<sup>e</sup>, Eviatar Nevo<sup>f,2</sup>, Jianquan Liu<sup>a,2</sup>

7

8 <sup>a</sup>Key Laboratory of Bio-Resource and Eco-Environment of Ministry of Education, College of Life  
9 Sciences, Sichuan University, Chengdu 610065, Sichuan, P. R. China;

10 <sup>b</sup>State Key Laboratory of Grassland Agro-ecosystem, College of Life Sciences, Lanzhou University,  
11 Lanzhou 730000, P. R. China

12 <sup>c</sup>Natural Resources and Watershed management Administration of Khorasan Razavi 9177948974, Iran

13 <sup>d</sup>School of Biology, University of St Andrews, St Andrews, Fife KY16 9TH, UK

14 <sup>e</sup>Department of Ecology and Genetics, Evolutionary Biology Center and Science for Life Laboratory,  
15 Uppsala University, Uppsala 75236, Sweden

16 <sup>f</sup>Institute of Evolution, University of Haifa, Mount Carmel, Haifa 3498838, Israel

17

18 <sup>1</sup>T.M., K.W., Q.H., and Z.X. contributed equally to this work.

19 <sup>2</sup>To whom correspondence may be addressed. Email: [liujq@nwipb.cas.cn](mailto:liujq@nwipb.cas.cn) or

20 [nevo@research.haifa.ac.il](mailto:nevo@research.haifa.ac.il)

21

22

23

24 ***SI Text***

25

26 **Sample collection, sequencing and mapping.** Silica gel dried leaves representing 34  
27 *P. pruinosa* and 122 *P. euphratica* individuals spanning the geographic ranges of the  
28 two species were collected from wild populations in western China, Kyrgyzstan, Iran,  
29 Israel, Spain and Algeria. Based on previous studies (1, 2) we excluded known  
30 hybrids between the two species occurring in western China where both species  
31 co-occur. In each population, sampled individuals were at least 500 m apart. For each  
32 individual, genomic DNA was extracted with a standard protocol and sequenced on  
33 the HiSeq 2000 and HiSeq 2500 Illumina platforms. The generated raw reads were  
34 subject to quality control and low-quality reads were removed if they met either of the  
35 following criteria: i)  $\geq 10\%$  unidentified nucleotides (*N*); ii) a phred quality  $\leq 7$  for  
36  $> 65\%$  of read length; iii) reads overlapping more than 10 bp with the adapter  
37 sequence, allowing  $< 2$  bp mismatch; iv) duplicate reads. We also trimmed both ends  
38 of a read if the consecutive three bases had a phred quality  $\leq 13$ , and discarded reads  
39 shorter than 45 bp after trimming. High quality clean reads were mapped to the *P.*  
40 *euphratica* reference genome (3) using BWA-MEM (0.7.10-r789) with default  
41 parameters (4), and alignment results and marked duplicate reads were sorted using  
42 SAMtools (v0.1.19) (5). The Picard package (<http://picard.sourceforge.net/>) was  
43 subsequently used to assign readgroup information containing library, lane, and  
44 sample identity, and the Genome Analysis Toolkit (GATK) (6) was used to perform  
45 local realignment of reads to enhance alignments in regions around putative indels.

46

47 **Filtering alignments and sites.** Before SNP calling, we removed low quality  
48 alignments which met either of the following criteria to avoid their effects on SNP  
49 detection and subsequent analysis: i) alignments with a mapping quality score lower  
50 than 30; ii) reads that have multiple best hits; iii) reads with a flag above 255; iv) pairs  
51 of reads with mates mapped incorrectly; v) alignments which anchored the short  
52 scaffolds of less than 2 kbp. To minimize the influence of sequencing and mapping

53 bias, we also removed low quality sites according to the following criteria: i) sites  
54 with unbalanced allele quality scores as determined using Wilcoxon rank sum test  
55 with threshold of  $P < 1e-5$ ; ii) sites with strand bias ( $P < 1e-5$ ); iii) bases with a  
56 quality below 20; iv) sites with extremely low ( $<2\times$ ) and extremely high coverage  
57 ( $>60\times$ ) per individual; v) sites that failed the Hardy-Weinberg Equilibrium test at  $P <$   
58  $1e-3$  using SAMtools and BCFtools (5). These filters left us with a data set  
59 comprising  $\sim 358$  Mbp, representing 72.4% of the genome.

60

61 **SNP discovery and genotype calling.** We used the SAMtools model (7) implemented  
62 in analysis of next generation sequencing data (ANGSD) (8) to estimate genotype  
63 likelihoods and to generate Beagle files at the population level. The major/minor state  
64 was determined by estimating the minor allele frequency (9) based on genotype  
65 likelihoods. A likelihood ratio test statistic for population allele frequency and  $P <$   
66  $1e-6$  was used as a SNP discovery criterion. SNPs were retained only if they were  
67 detected in more than 50% of sampled individuals over all populations. The site  
68 frequency spectrum (SFS) was estimated using realSFS (10) implemented in ANGSD.  
69 The full data were used to compute posterior probabilities of genotypes at each site  
70 for each individual using the sample allele frequency as prior for genotype  
71 frequencies under the assumption of Hardy-Weinberg equilibrium. BEAGLE (11, 12)  
72 was then used to infer haplotypes of individuals within each population and improve  
73 the genotype imputation based on genotype likelihoods previously estimated. In a  
74 final filtering strategy, the sites that showed a correlation between the observed and  
75 imputed data ( $r^2$ )  $< 0.9$  were removed, resulting in a total of 5,057,358 SNPs.

76

77 **Relatedness analysis.** We used the KING program (13) to estimate degrees of  
78 relatedness between all individuals based on pairwise comparisons of SNP data.  
79 Those pairs exhibiting greater than 3rd-degree relationships were removed, leaving a  
80 total of 99 individuals (27 and 72 individuals for *P. pruinosa* and *P. euphratica*,  
81 respectively) for subsequent population genomics analyses.

82

83 **Ancestral state reconstruction.** To identify the ancestral state of *P. euphratica* and *P.*  
84 *pruinosa*, ten additional individuals representing the following taxa were sequenced to  
85 at least 15× depth: *P. ilicifolia*, *P. davidiana*, *P. lasiocarpa*, *P. laurifolia*, *P. nigra*, *P.*  
86 *trichocarpa*, *P. deltoides*, *P. fremontii*, *P. angustifolia* and *P. tremuloides*. We mapped  
87 these data to the *P. euphratica* reference genome and genotyped all segregating sites  
88 using the same criteria as described above. Sites that were detected in at least three  
89 species and exhibited the same homozygous genotype were directly used as the  
90 ancestral state. After the removal of tri-allelic sites, we identified the ancestral state at  
91 about 64% of the SNPs.

92

93 **Population structure analysis.** We compiled an artificial nucleotide sequence from  
94 the nuclear genome data comprising all SNPs and their ancestral states determined  
95 above. We then performed a phylogeographic analysis using Neighbor-net (14)  
96 implemented in SPLITSTREE (version 4.13.1) (15) with default parameters. After  
97 mapping our resequencing data against the *P. trichocarpa* chloroplast genome  
98 (Accession Number NC\_009143.1), only positions covered by a minimum number of  
99 three independent unique reads with base qualities of  $\geq 30$  were used to call consensus  
100 sequences. The phylogenetic tree was constructed using maximum likelihood with  
101 MEGA (16). Principal component analysis (PCA) was performed on all SNPs using  
102 the smartpca program in EIGENSOFT (17). A Tracy-Widom test was used to  
103 determine the significance level of eigenvectors. The software identified two *P.*  
104 *pruinosa* (Kyrgyzstan) and five *P. euphratica* (Spanish, Algerian, Israeli and two  
105 Iranian) individuals as outliers, which were subsequently removed from analysis. In  
106 addition, we used the program NGSadmix (18), which is based on genotype  
107 likelihoods to directly estimate individual admixture proportions from next generation  
108 sequencing data, the results revealed a similar population genetic structure in our  
109 samples. To further investigate relationships, patterns of splits and mixtures between  
110 these populations, we produced a maximum likelihood drift tree using the software  
111 TreeMix (19) and inferred migration events. For further insight into relationships  
112 among lineages, we performed identity-by-descent (IBD) blocks analysis using the

113 algorithm from BEAGLE (11, 12) with the following parameters: window = 100,000;  
114 overlap = 10,000; ibdtrim = 100; ibdlod = 10.

115

116 **Demographic inference.** We used individuals with high sequencing coverage ( $>15\times$ )  
117 from each population and applied the Pairwise Sequentially Markovian Coalescent  
118 (PSMC) model (20) to reconstruct demographic history. PSMC requires diploid  
119 consensus sequences. The consensus was generated from the ‘pileup’ command of the  
120 SAMtools software package. We masked bases with extremely low (less than a third  
121 of the average depth) or extremely high coverage (threefold the average depth) and  
122 used the parameters `-N25 -t15 -r5 -p "4+25*2+4+6"` to perform the analysis. Results  
123 were scaled using an assumed mutation rate of  $3.8\times 10^{-8}$  per base pair per generation  
124 and a generation time of 15 years (21). The bootstrapping analysis was performed  
125 following the software instruction: 1) the program “splitfa” in PSMC package was  
126 used to split long sequences into shorter segments (`utils/splitfa diploid.psmcfa >`  
127 `split.psmcfa`); 2) the PSMC was performed 100 times with “-b” option, which will  
128 enable PSMC to randomly sample with replacement from these segments (`seq 100 |`  
129 `xargs -i echo psmc -N25 -t15 -r5 -b -p "4+25*2+4+6" -o round-{}.psmc split.fa | sh`);  
130 3) combine the result files together and plot with program ‘psmc\_plot.pl’ from PSMC  
131 package (`cat diploid.psmc round-*.psmc > combined.psmc`; `utils/psmc_plot.pl`  
132 `combined combined.psmc`). We also used coalescent simulations applying the  
133 composite likelihood method implemented in `fastsimcoal2.1` software (22) to infer  
134 demographic parameters based on the site frequency spectrum. The folded spectra  
135 between each pair of populations were used to minimize potential biases when  
136 determining ancestral allelic states. Alternative models of historical events were fitted  
137 to the joint site frequency spectra data. All parameter estimates were global ML  
138 estimates from 50 independent `fastsimcoal2.1` runs, with 100,000 simulations per  
139 likelihood estimation (`-n100,000, -N100,000`) and 40 cycles of the likelihood  
140 maximization algorithm. Confidence intervals of parameter estimates were obtained  
141 by parametric bootstrapping, with 100 bootstrap replicates per model. The best model  
142 was identified through the maximum value of likelihoods and Akaike’s information

143 criterion (AIC); simulated datasets were compared with the observed site frequency  
144 spectra to evaluate the fit of the best demographic model.

145

146 **Linkage Disequilibrium and Recombination.** We measured and compared patterns  
147 of linkage disequilibrium (LD) for each lineage except PeE due to its limited sample  
148 size. The correlation coefficient  $r^2$  of pairwise SNPs was calculated using Haploview  
149 (23) with the parameters: -dprime -maxDistance 50 -minMAF 0.05 -hwcutoff 0.001  
150 -minGeno 0.6. To minimize any bias due to sample size variation, we randomly  
151 reduced the size of each lineage to the same number of individuals ( $n = 21$ ).  
152 Population-scaled recombination rates along each scaffold ( $\rho = 4N_e r$  per kb) were  
153 estimated using a Bayesian reversible-jump MCMC scheme under the crossing-over  
154 model of the program interval in the LDhat (24) package with standard defaults. Rates  
155 were estimated for each lineage separately.

156

157 **Genomic diversity and divergence.** Many of the population genetic summary  
158 statistics are direct functions of the site frequency spectrum (SFS). We estimated the  
159 folded SFS and calculated nucleotide diversity ( $\pi$ ), population scaled mutation rate  $\theta_w$   
160 (Watterson's estimator) and Tajima's  $D$  for each lineage, using a probabilistic method  
161 (25) implemented in the software ANGSD (8) which takes genotype uncertainty into  
162 account. Using the likelihoods of sample allele frequencies for each population and a  
163 2D-SFS as a prior, we quantified population genetic differentiation ( $F_{ST}$ ) and the  
164 number of nucleotide substitutions ( $D_{xy}$ ) between each pair of populations using the  
165 software ngsTools (26, 27). All of the parameters were calculated using a sliding  
166 window approach (10 Kbp non-overlapping window) and the windows were  
167 discarded if there were less than 3 Kbp left after all of the above filtering steps.

168

169 **Coalescent simulations.** To examine the effects of demographic processes on the  
170 heterogeneous pattern of genomic divergence, we conducted coalescent simulations to  
171 compare observed patterns of polymorphism and differentiation to those expected  
172 under different demographic scenarios. Simulations were performed using the

173 program *msms* (28) based on the parameters derived from the best-fitting model  
174 inferred above. Specifically, we simulated genotypes corresponding to a 10Kbp region  
175 with the same sample size as the real data for 500,000 replications, from where we  
176 simulated genotype likelihoods using the program *msToGlf* in ANGSD (8) by  
177 assuming a mean sequencing depth of  $11\times$  and an error rate of 0.005. We then  
178 estimated values of nucleotide diversity ( $\pi$ ), Tajima's  $D$  and  $F_{ST}$  for all simulated  
179 replicates using ANGSD to test whether the simulated data matched the observed  
180 data.

181

182 **Divergent regions of exceptional differentiation.** The outlier windows for each  
183 population pair were identified by combining an empirical approach with a  
184 permutation approach. We first permuted the SNPs across the genome 5,000,000  
185 times to get a null  $F_{ST}$  distribution for each of the windows holding different amounts  
186 of variable sites. We then determined the  $P$ -value by comparing window estimates of  
187  $F_{ST}$  against its relative null distribution and corrected for multiple testing using the  
188 False Discovery Rate (FDR) adjustment. Only windows falling in the top 1% of the  
189 empirical  $F_{ST}$  distribution and with FDR lower than 0.01 were considered as putative  
190 outlier windows. This approach avoided a statistical power bias caused by a fixed  
191 threshold and minimized noise from individual site-based divergence estimates.  
192 Finally, adjacent outlier windows were combined to form larger divergent regions and  
193 the number and size of these regions were compared among all population pairs.

194

195 **Genes under positive selection.** We applied the Hudson-Kreitman-Aguadé (HKA)  
196 test (29) and the population branch statistic (PBS) (30) to verify whether recent  
197 selective sweeps had acted specifically in each lineage. Taking into account the very  
198 recent split between PeC and PeE, and the relatively few samples for PeE, we  
199 discarded PeE and compared the levels of polymorphism and divergence among the  
200 other three lineages (PeC, PeW and Pp) to identify genes under positive selection in  
201 each lineage. We considered only coding regions and analyzed a total of 28,148 genes.  
202 For each gene, we recorded the number of polymorphic sites in one lineage (A) and

203 the number of fixed differences (the sites with  $F_{ST} > 0.95$ ) between this lineage and  
204 both of the other two lineages (B). We then performed the HKA test by comparing the  
205 ratio of A/B to the genome-wide average, computed as the sum of A and B values  
206 across all genes analyzed and testing the null hypothesis  
207  $A(\text{gene})/B(\text{gene})=A(\text{genome-wide})/B(\text{genome-wide})$  using a Pearson's chi-square test  
208 on the 2x2 contingency table (31). In addition, we compared the three pairwise  $F_{ST}$   
209 values between these populations and used the classical transformation by  
210 Cavalli-Sforza,  $T = -\log(1 - F_{ST})$  to obtain estimates of lineage divergence time  $T$  in  
211 units scaled by population size. The length of the branch leading to one population  
212 was then obtained as:

$$213 \quad PBS_{POP1} = \frac{T^{pop1-2} + T^{pop1-3} - T^{pop2-3}}{2}$$

214 Finally, genes with a significant nominal  $P$ -value ( $<0.01$ ) for the HKA test and a  
215 ranked PBS above the 95th percentile were considered as positively selected genes.  
216 Functional classification of GO categories for these genes was performed using the  
217 Blast2GO program (32). Enrichment analysis was performed and Fisher's exact test  
218 was used to calculate the statistical significance of enrichment.  $P$ -values were further  
219 adjusted by Benjamini-Hochberg false discovery rate (33) and the adjusted  $P$ -value  
220 cut-off was 0.05.

221

222



**SI Figures:**

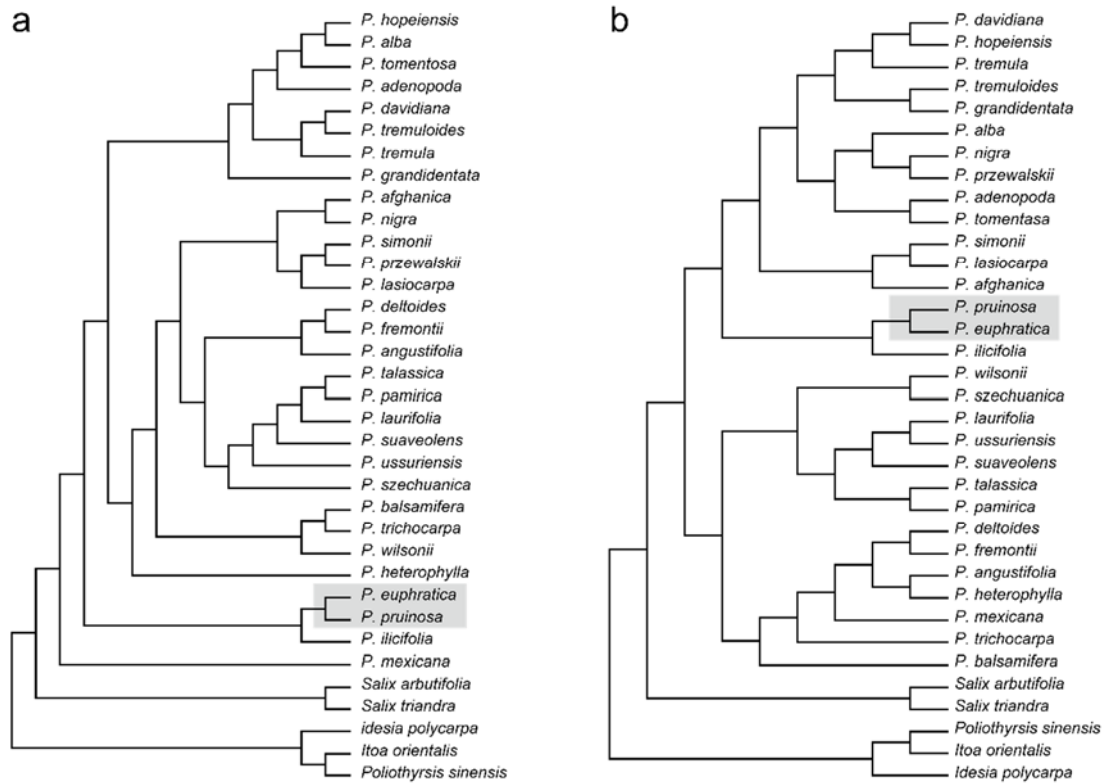

**Fig. S1:** Phylogeny of *Populus* from the combined (a) 23 single-copy nuclear DNA sequence and (b) 34 plastid fragments. Redrawn from ref. 34.

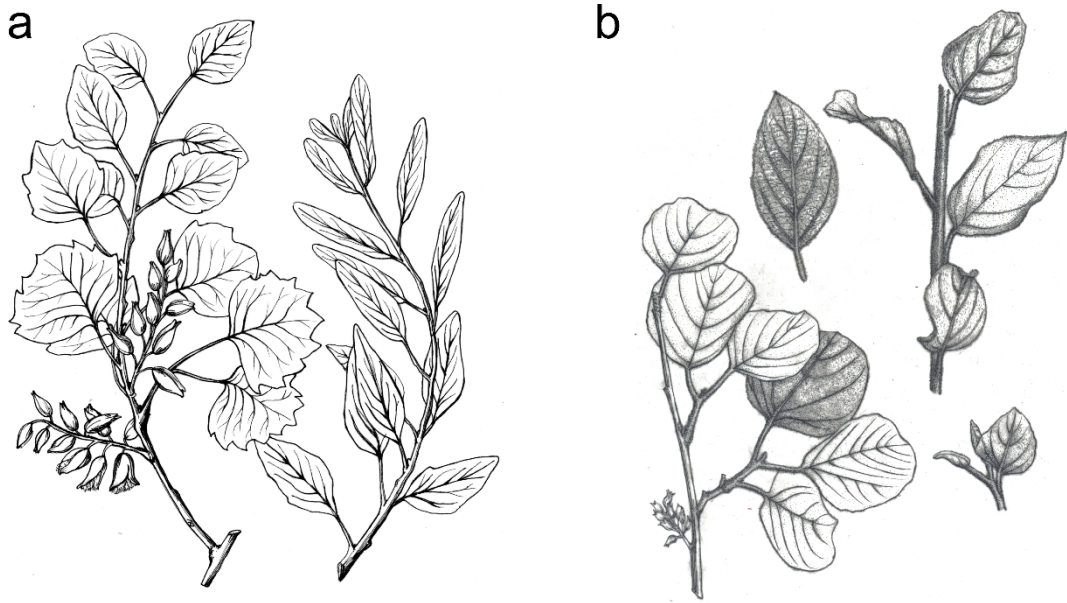

**Fig. S2:** Diagram of the leaf morphology for *Populus euphratica* (a) and *P. pruinosa* (b).

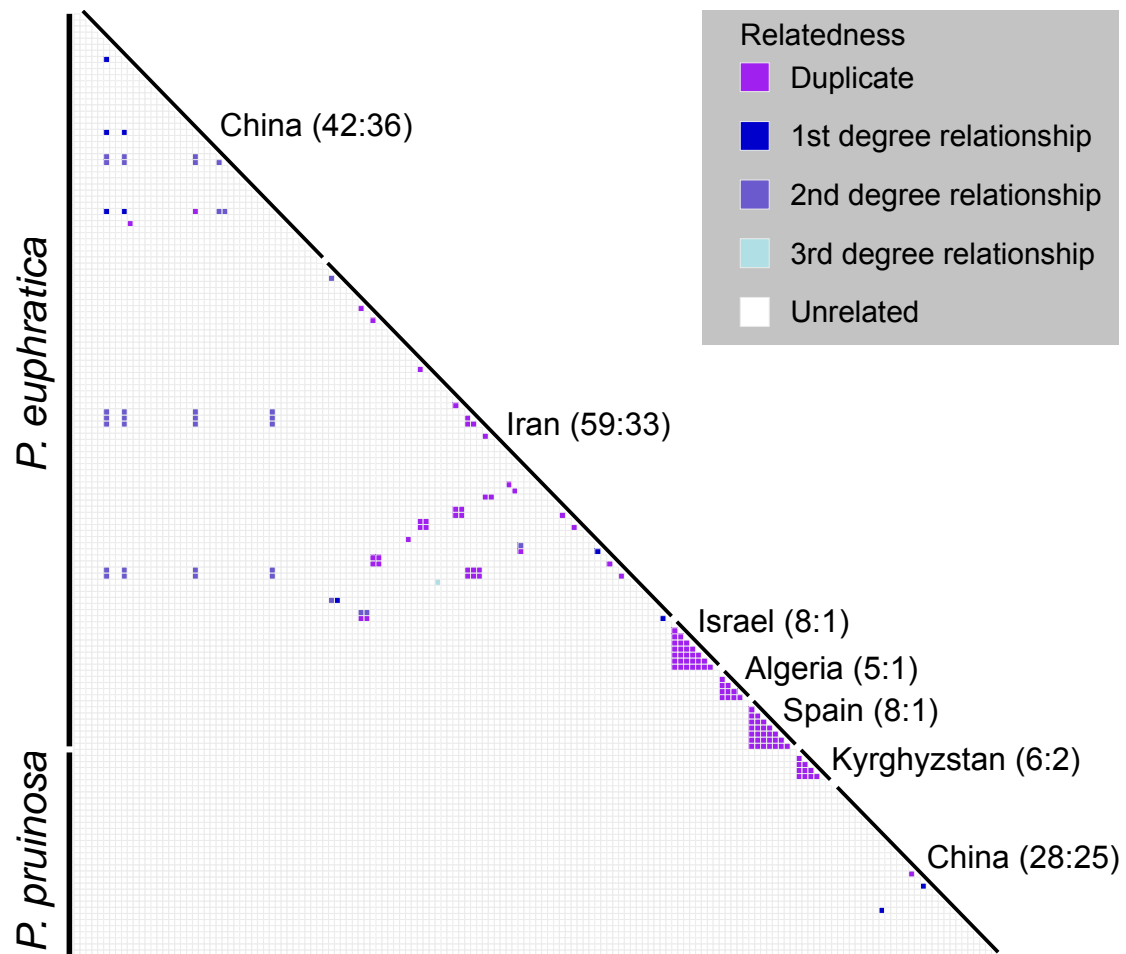

**Fig. S3:** Estimated genetic relatedness between each pair of 156 individuals using KING software, also showing the number of individuals before and after removing the samples that are more related than 3<sup>rd</sup>-degree relationships for each sample geographical origin. A total of 99 individuals were retained for subsequent population genetic analyses.

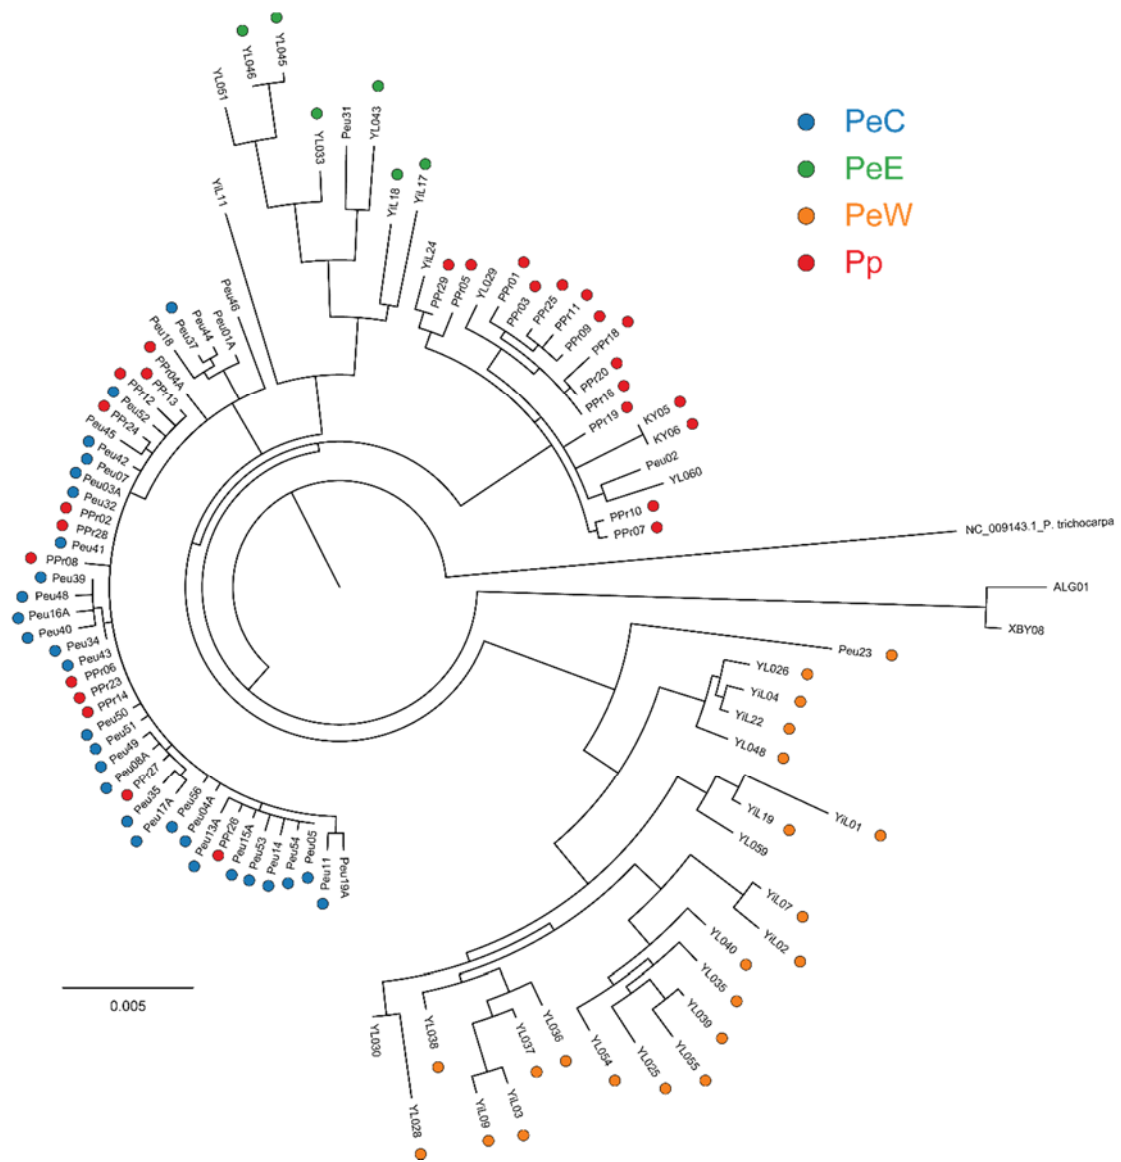

**Fig. S4:** Maximum-likelihood phylogenetic tree reconstructed from chloroplast genome, using *P. trichocarpa* (NC\_009143.1) as outgroup.

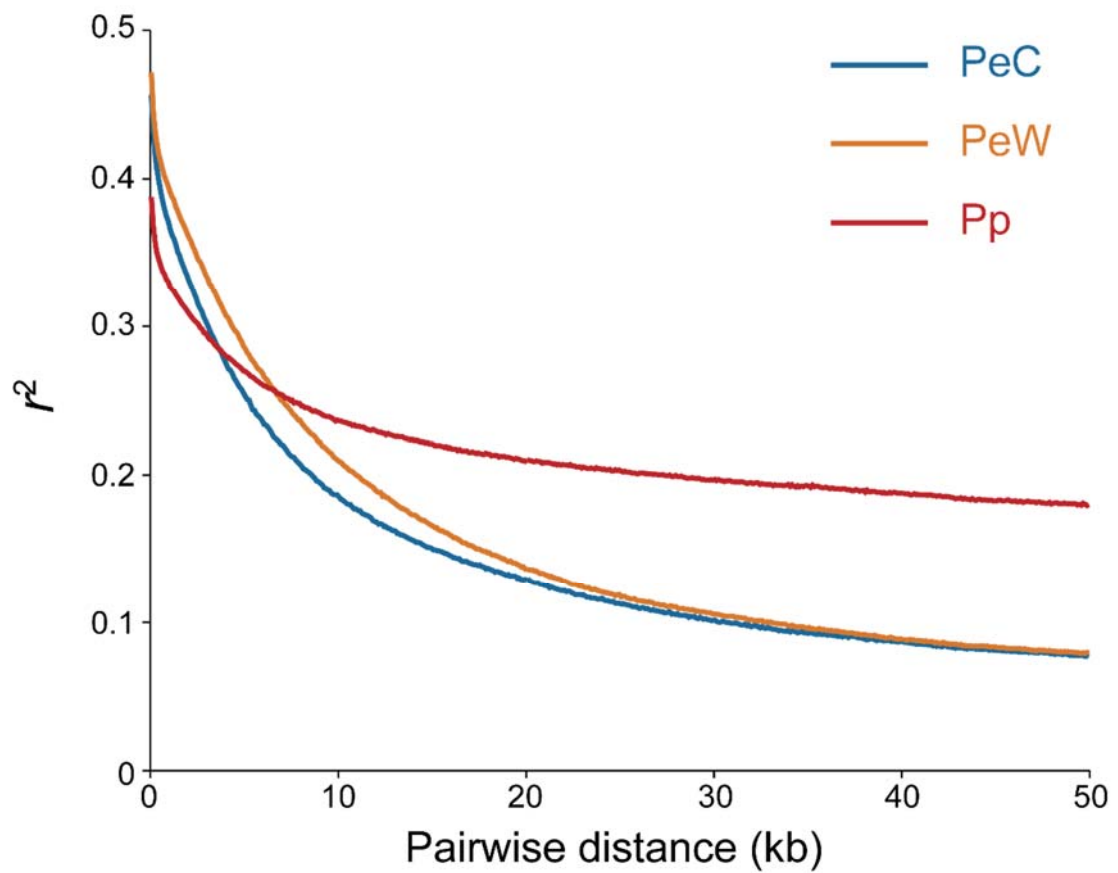

**Fig. S5:** Decay of linkage disequilibrium (LD), measured by  $r^2$ , was calculated for the lineages with at least 21 individuals sequenced. The genome-wide average  $r^2$  dropped to  $0.187 \pm 0.249$  (mean  $\pm$  standard deviation),  $0.210 \pm 0.281$  and  $0.237 \pm 0.308$  at 10 kb,  $0.129 \pm 0.192$ ,  $0.137 \pm 0.216$  and  $0.209 \pm 0.287$  at 20 kb for PeC, PeW and Pp, respectively.

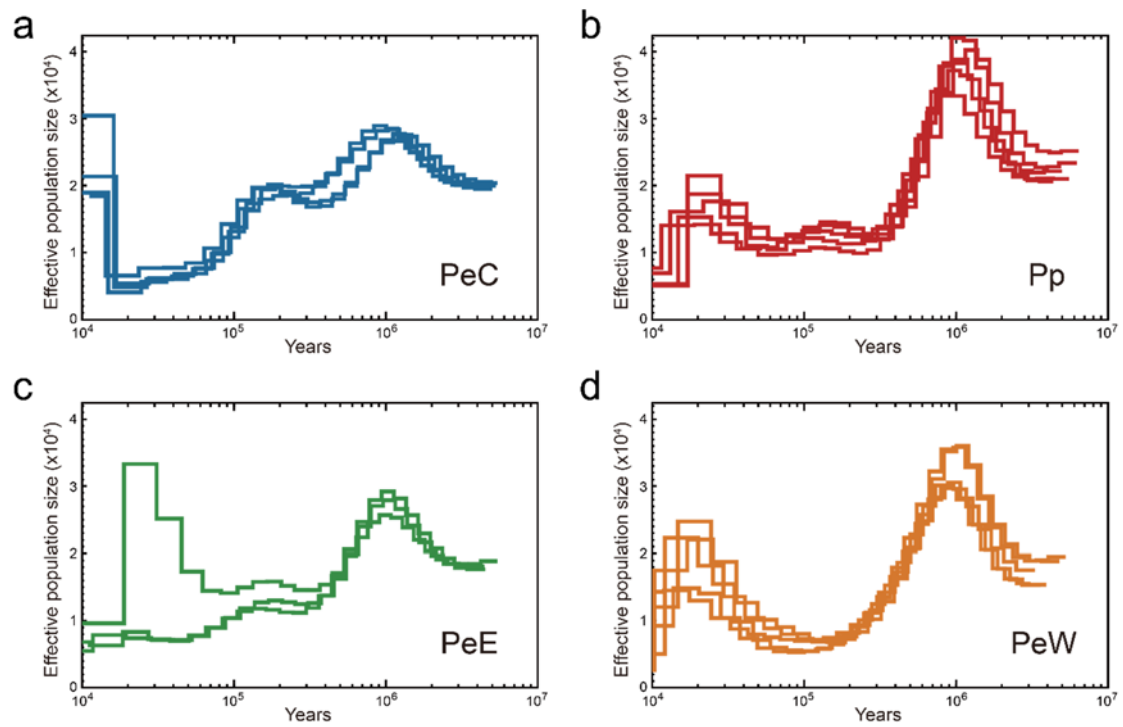

**Fig. S6:** Changes in effective population size ( $N_e$ ) through time inferred by PSMC for lineages PeC (a), Pp (b), PeE (c) and PeW (d). The individuals with high sequencing coverage ( $>15 \times$ ) were selected for each lineage.

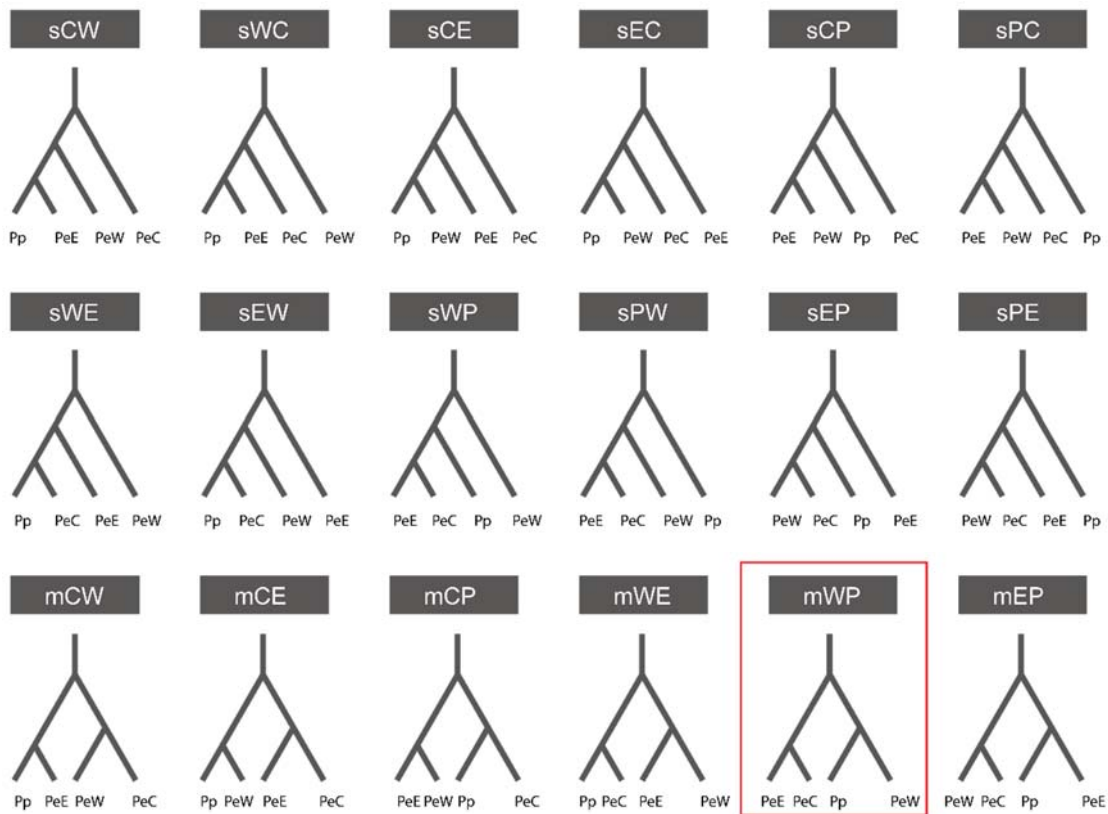

**Fig. S7:** Schematic diagram of all possible topological structures of these four lineages used in fastsimcoal2 to infer demographic parameters. For each topological structure, the parameters of gene flow, divergence time and effective population sizes were flexible, then we performed parameter estimation for 50 independent runs and chose the model with the highest likelihood. Note that the topological structure of model ‘mWP’ was best-supported according the value of the likelihoods and Akaike’s information criterion.

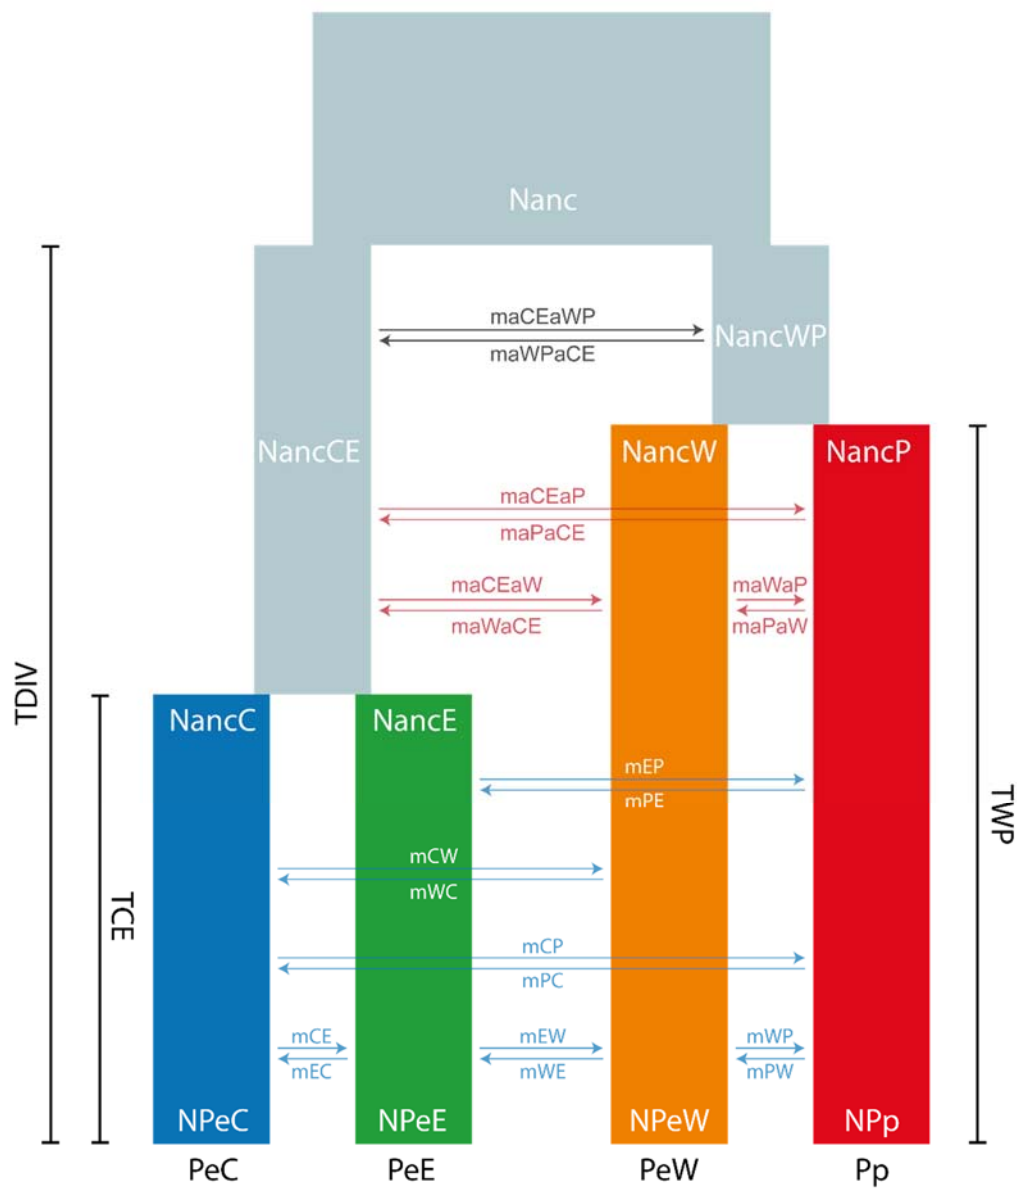

**Fig. S8:** Schematic diagram of the best-fitting model inferred by fastsimcoal2 with the corresponding parameter tags. Note that this model is a modified version of model ‘mWP’ (Fig. S6) with exponential change in population size following their divergence. The point estimates and 95% confidence intervals of demographic parameters are shown in Table S4.



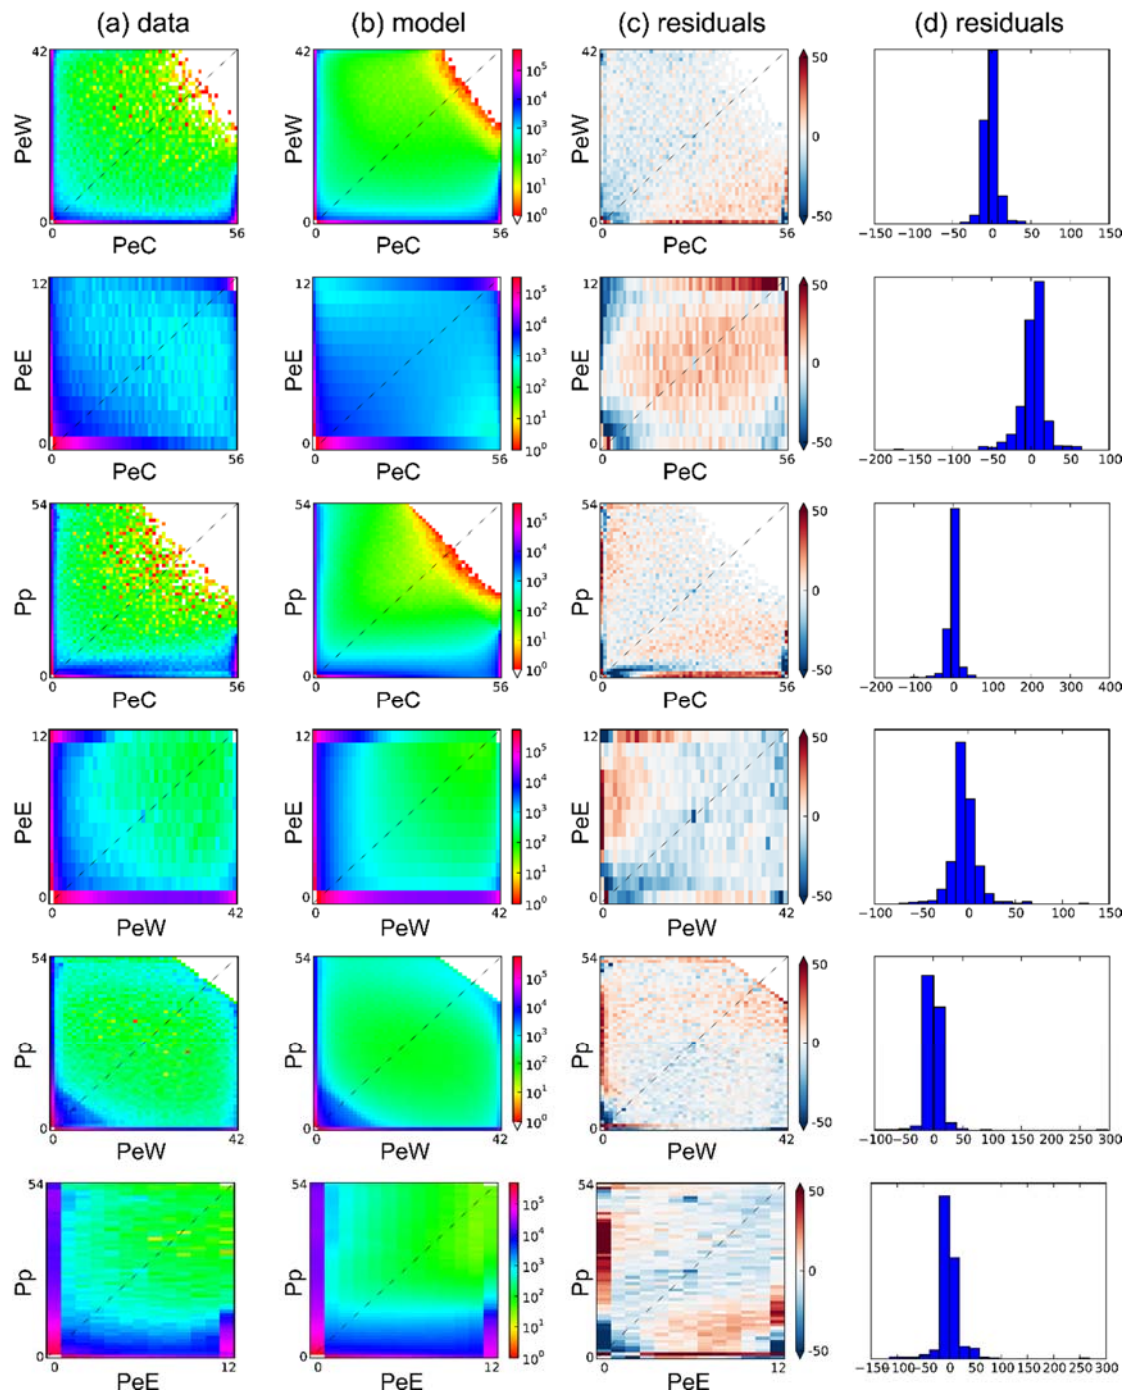

**Fig. S9:** Assessment of model fit for the best-fitting demographic model for all pairwise comparisons. **(a)** Observed joint SFS for each pair of lineages studied. **(b)** Expected joint SFS under the global ML parameters inferred by fastsimcoal2.1 for this model. **(c)** Model residuals across joint SFS. **(d)** Histograms of model residuals.

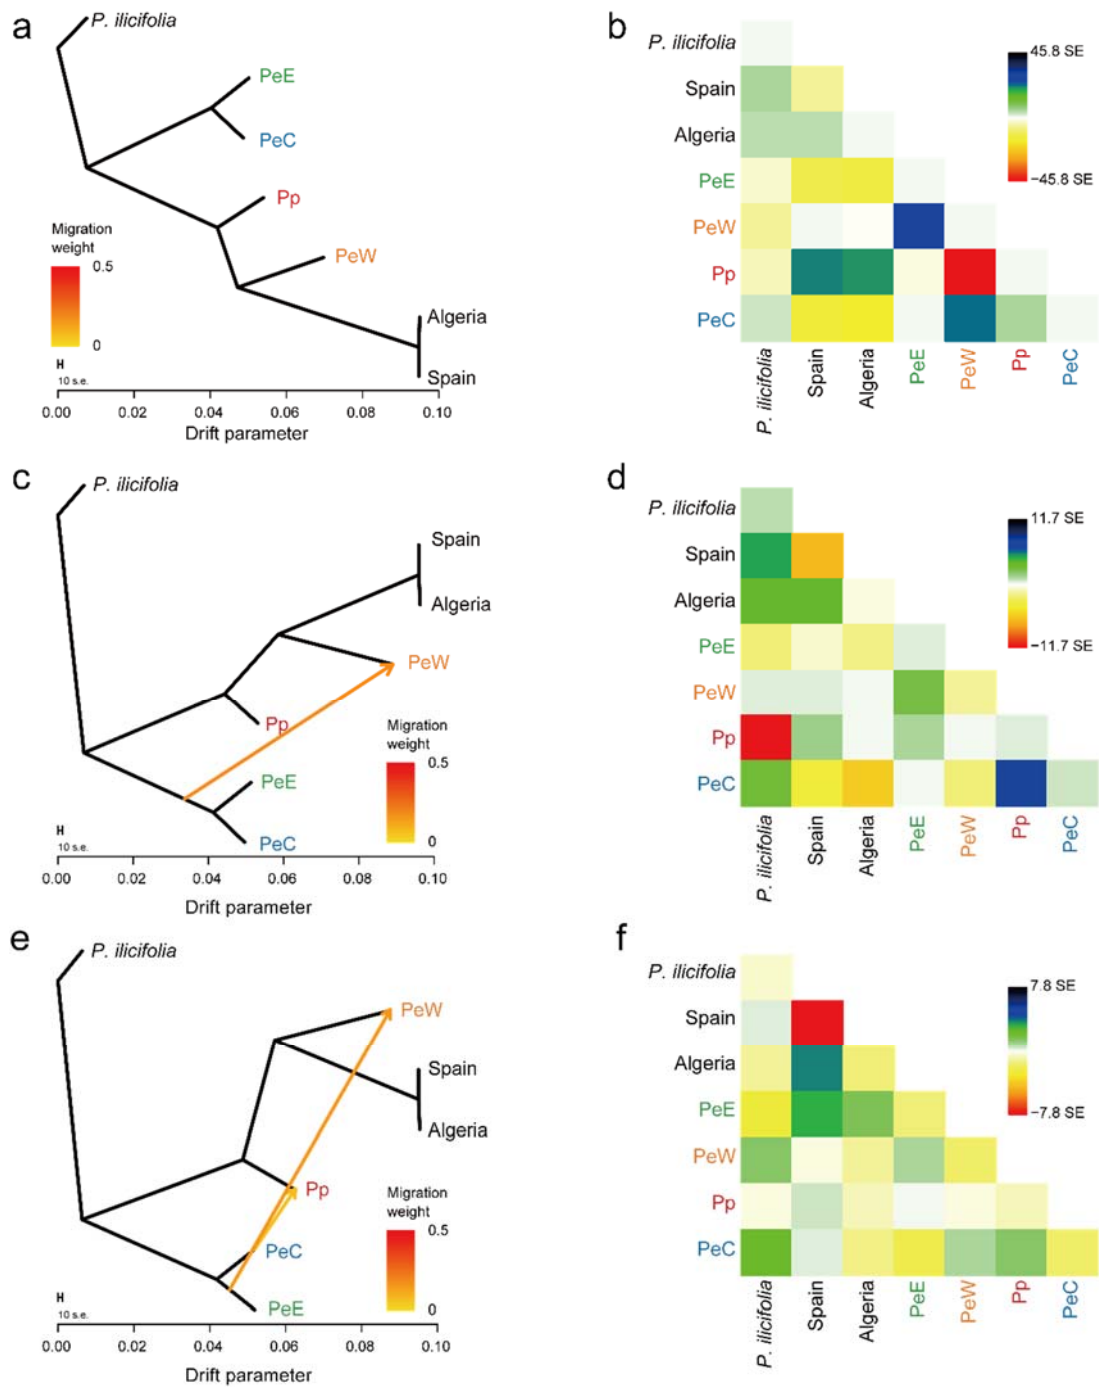

**Fig. S10:** The maximum likelihood tree for populations of *P. euphratica* and *P. pruinosa* inferred by TreeMix rooted with *P. ilicifolia*, allowing no (a), one (c) or two (e) migration events, respectively. The scale bar shows ten times the average standard error of the entries in the sample covariance matrix. Migration edges are depicted as arrows colored by migration weight. The residual fit from these graphs are shown in (b), (d) and (f), respectively.

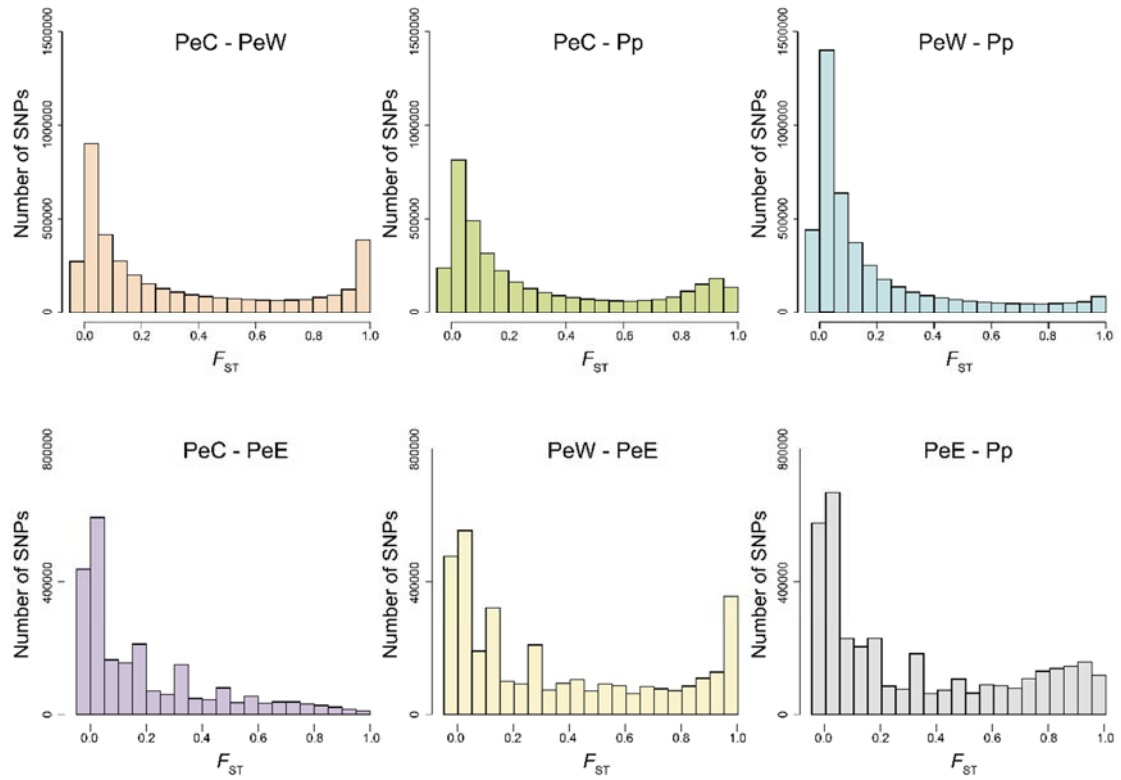

|           | PeC - PeW | PeC - Pp  | PeW - Pp  | PeC - PeE | PeW - PeE | PeE - Pp  |
|-----------|-----------|-----------|-----------|-----------|-----------|-----------|
| PeC - PeW | -         | < 2.2e-16 |
| PeC - Pp  | 0.0656    | -         | < 2.2e-16 | < 2.2e-16 | < 2.2e-16 | < 2.2e-16 |
| PeW - Pp  | 0.1786    | 0.1606    | -         | < 2.2e-16 | < 2.2e-16 | < 2.2e-16 |
| PeC - PeE | 0.2448    | 0.2268    | 0.1977    | -         | < 2.2e-16 | < 2.2e-16 |
| PeW - PeE | 0.1334    | 0.1369    | 0.2559    | 0.2084    | -         | < 2.2e-16 |
| PeE - Pp  | 0.1558    | 0.1369    | 0.2181    | 0.1782    | 0.0739    | -         |

**Fig. S11:**  $F_{ST}$  distributions for each pair of lineages. The differences of the distribution shape between lineage pairs were determined by Kolmogorov-Smirnov test. The values of the Kolmogorov-Smirnov statistic and  $p$ -values were showed below and above the diagonal, respectively.

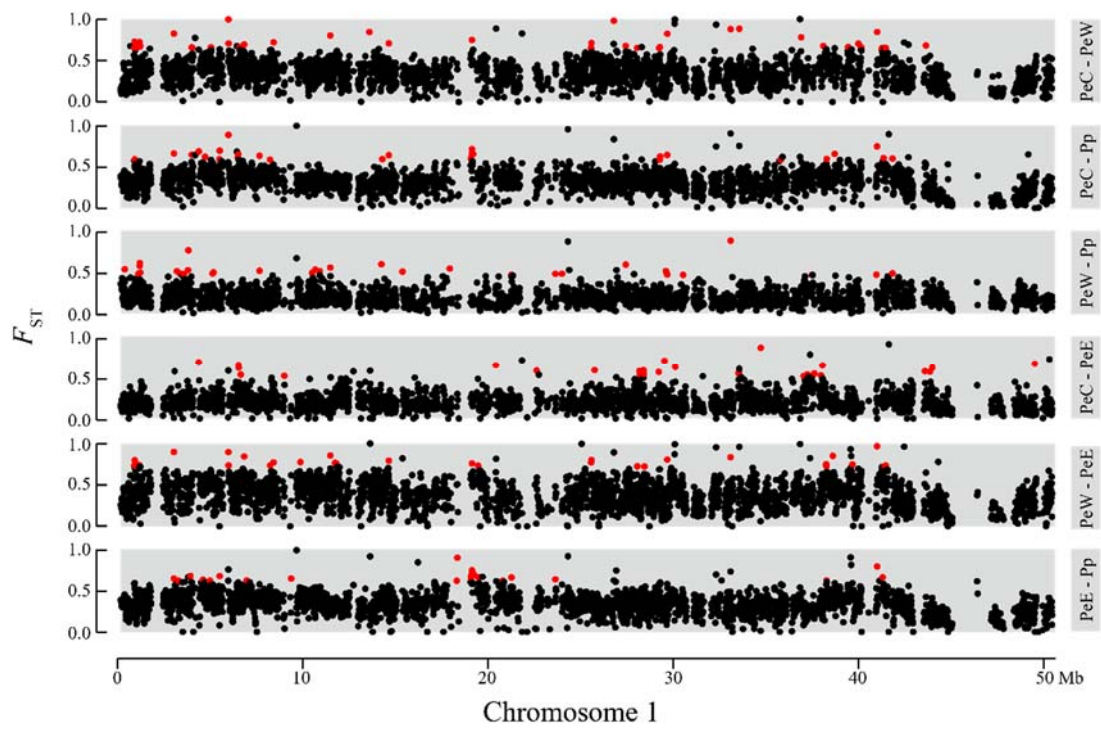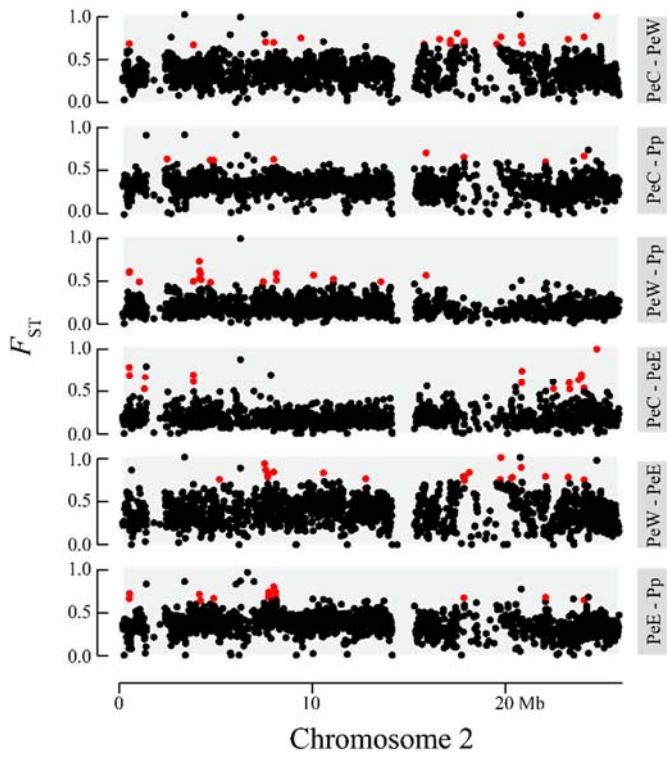

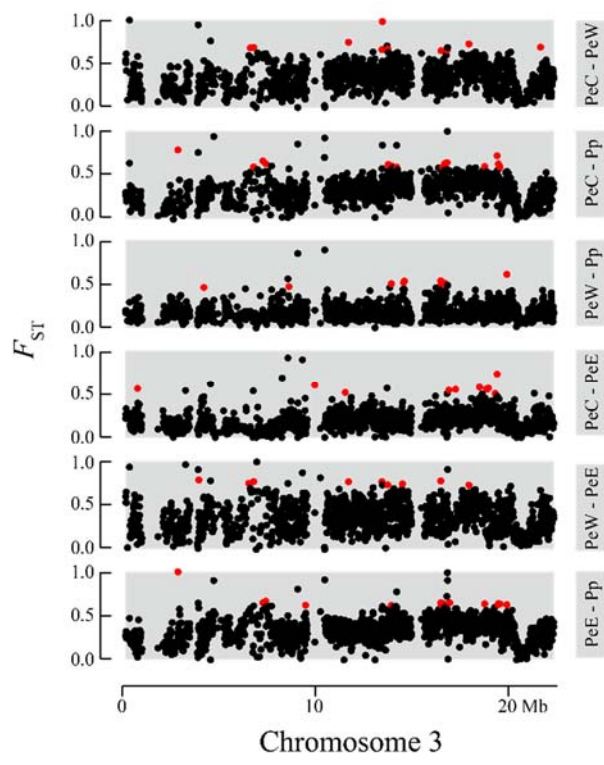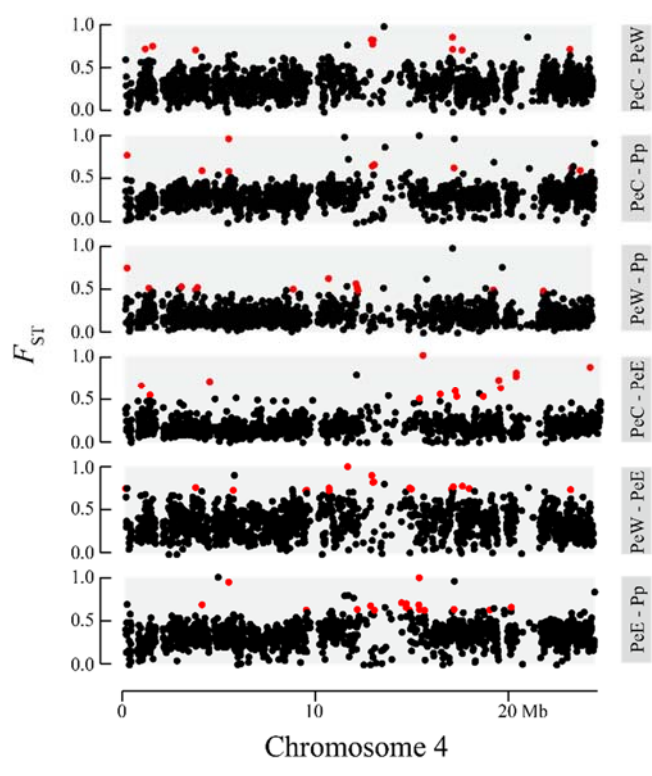

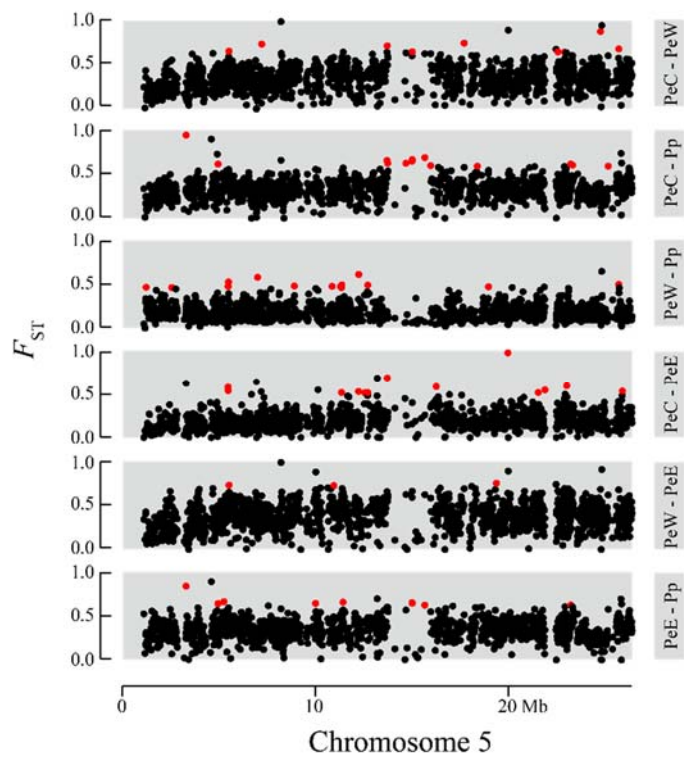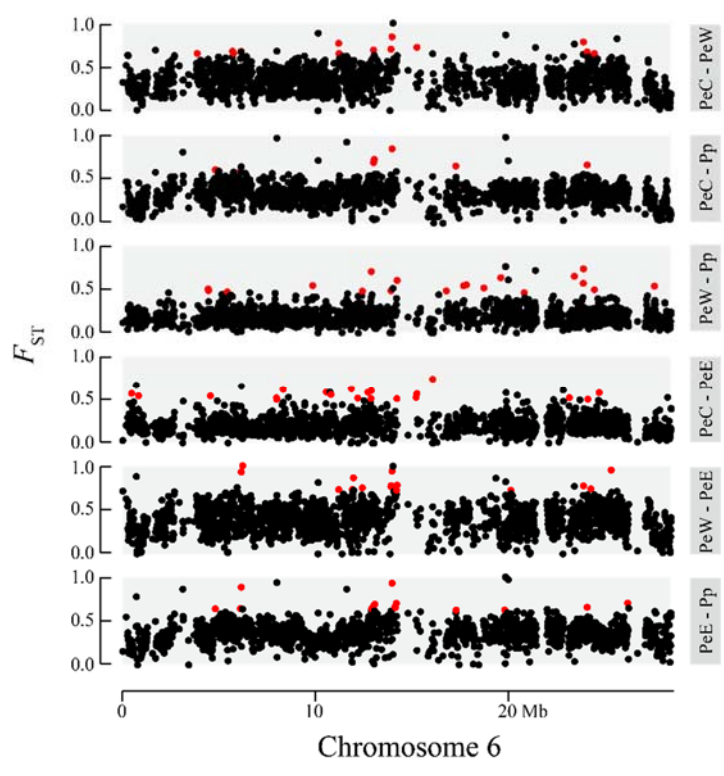

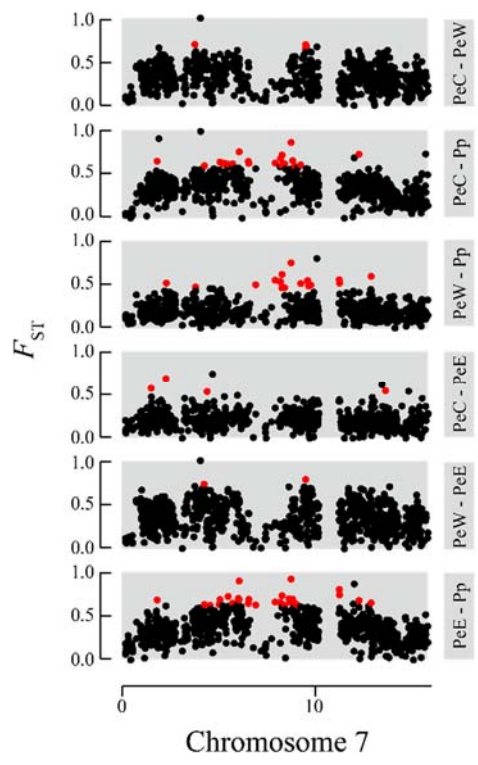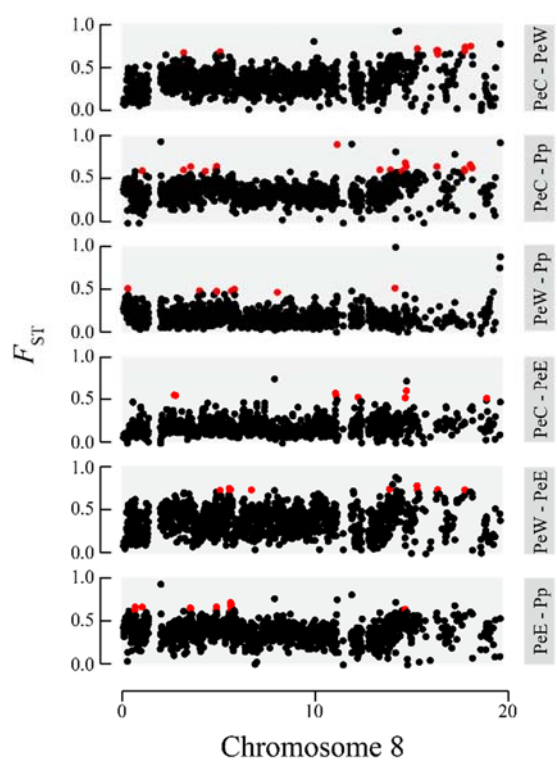

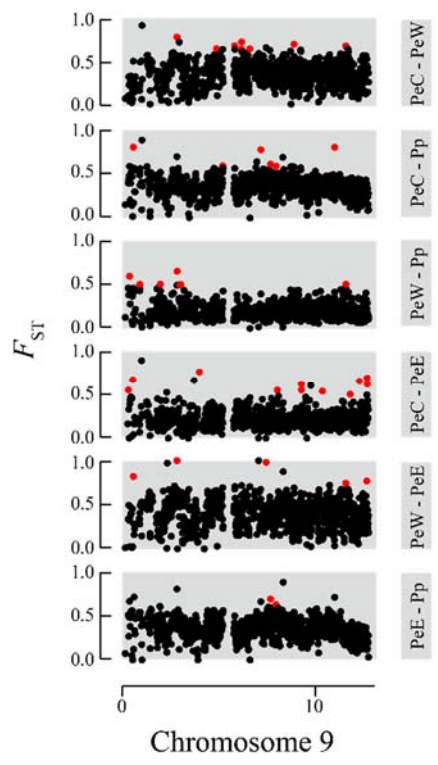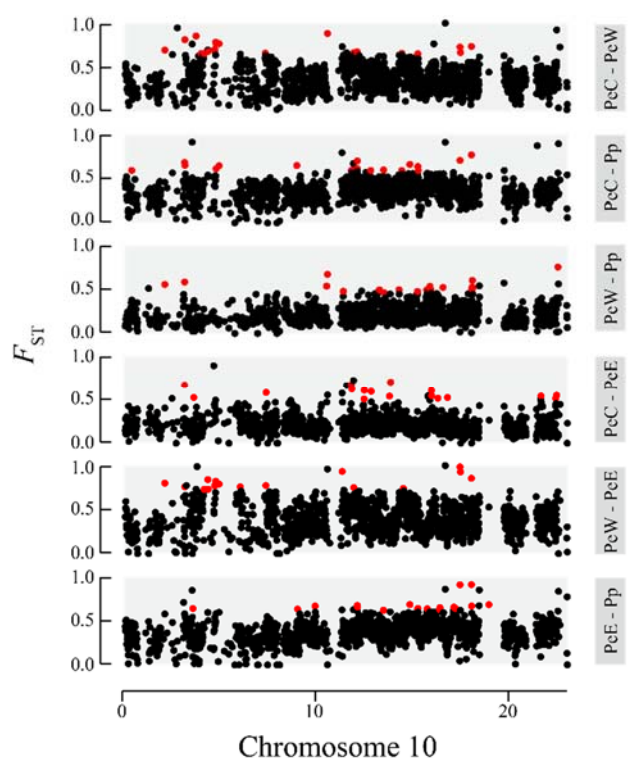



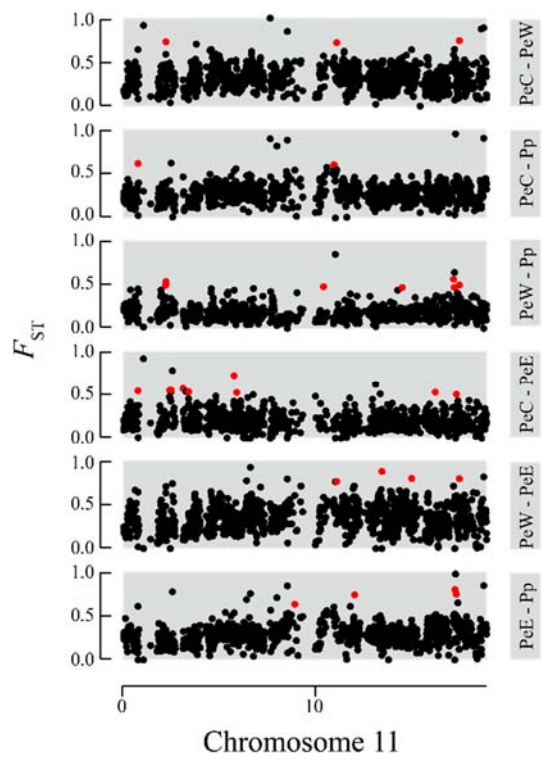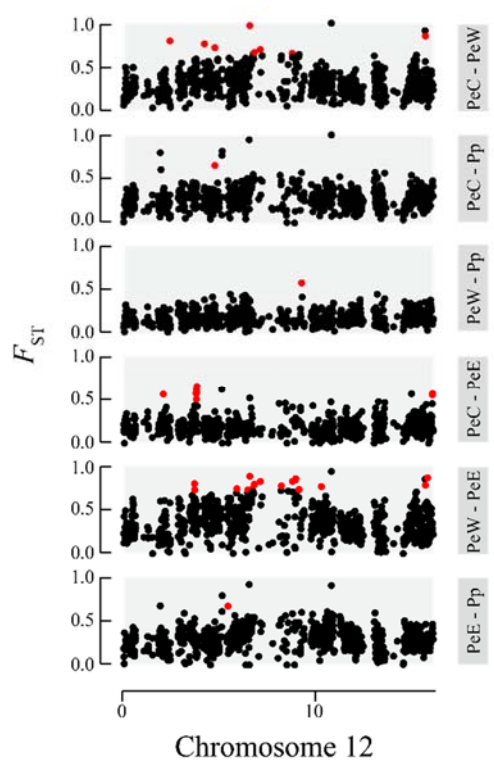

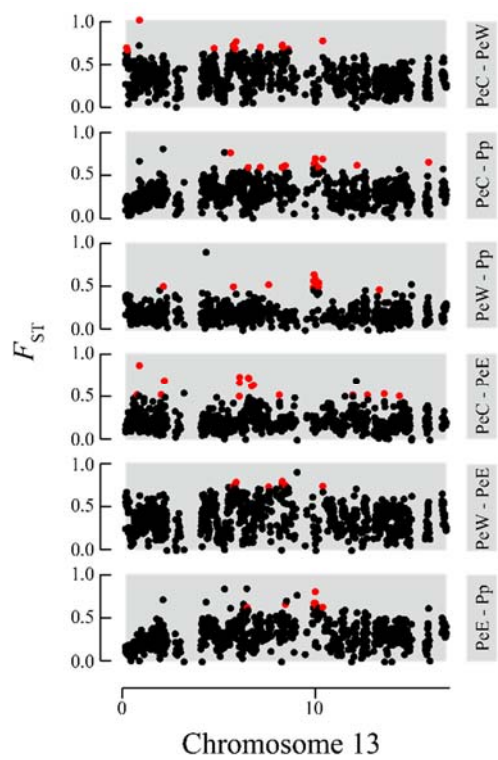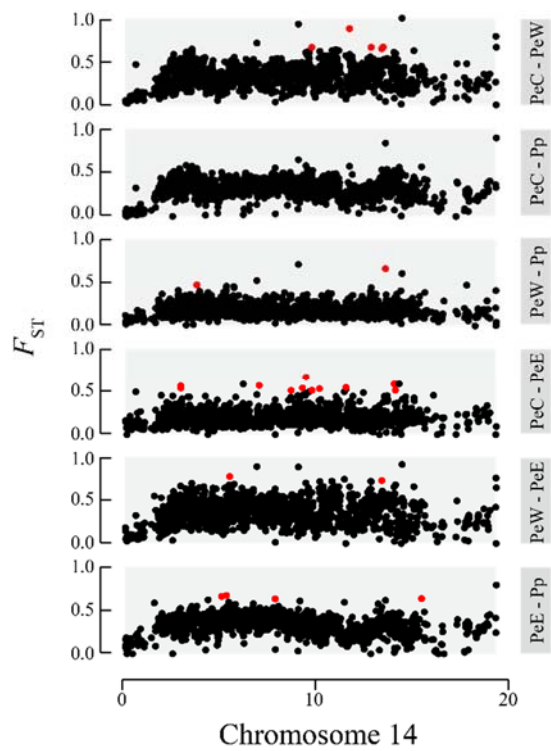

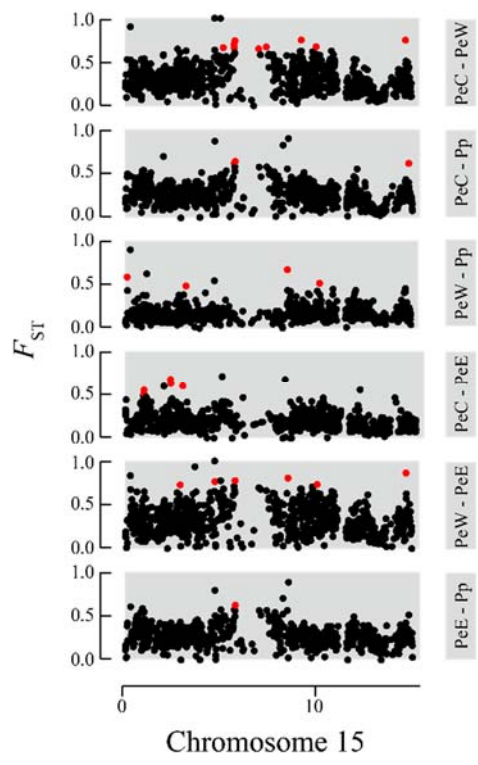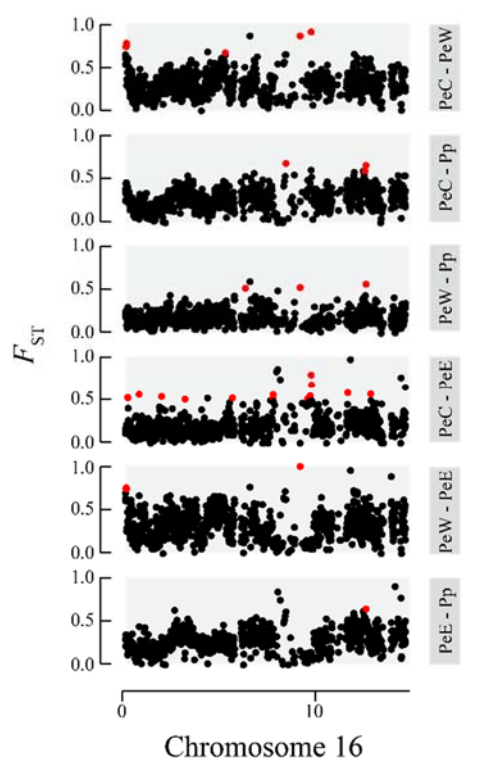

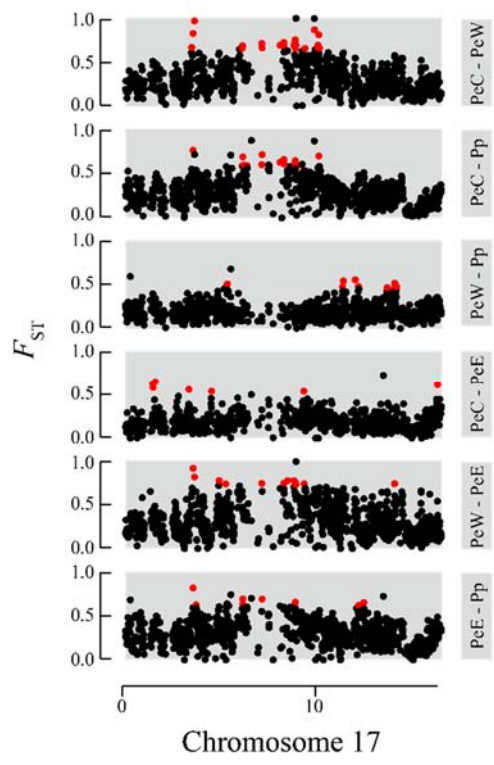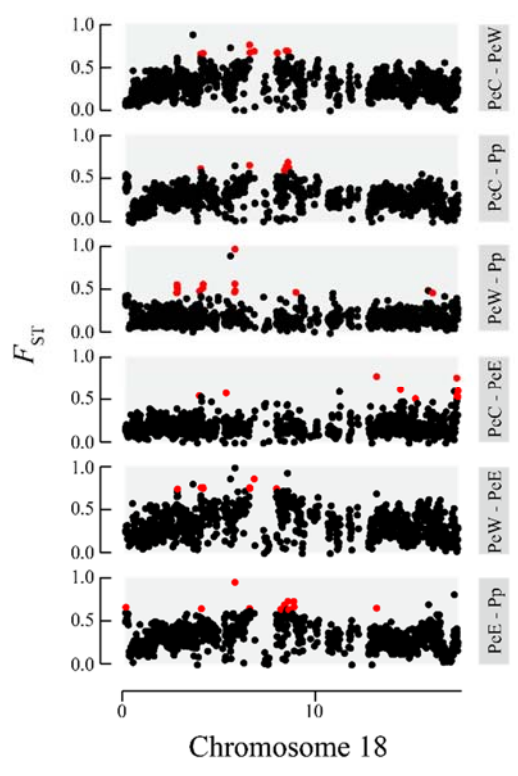

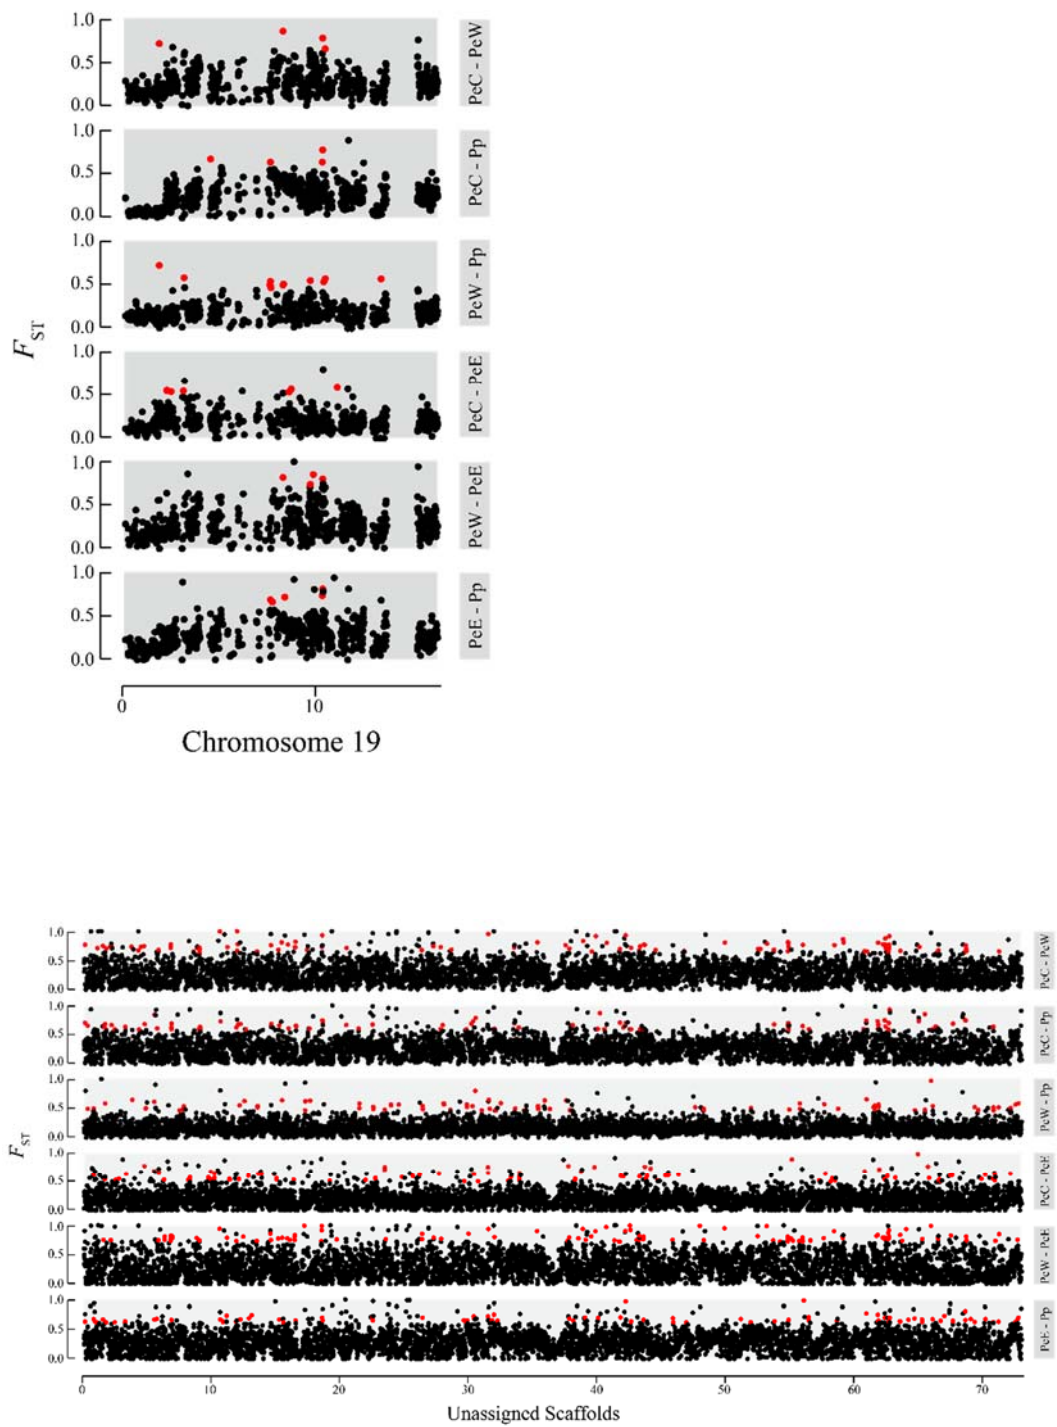

**Fig. S12:** Pairwise genetic divergence ( $F_{ST}$ ) in 10-kb sliding windows across all chromosomes for all comparisons. Genomic islands of divergence are shown in red.

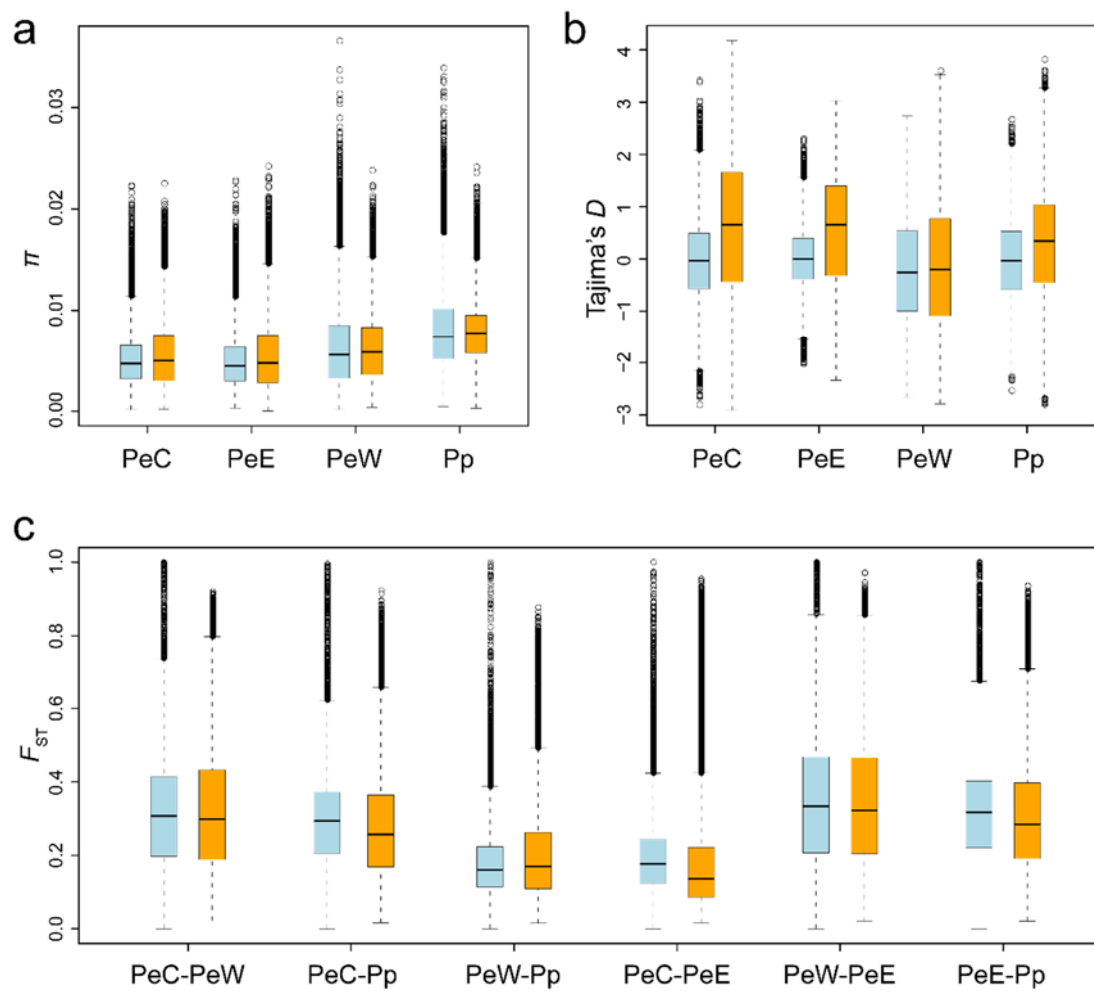

**Fig. S13:** Comparisons of (a) nucleotide diversity ( $\pi$ ), (b) Tajima's  $D$  and (c) genetic differentiation ( $F_{ST}$ ) between the observed (blue) and simulated (orange) data using *msms* under the best-fitting demographic model inferred by *fastsimcoal2*.

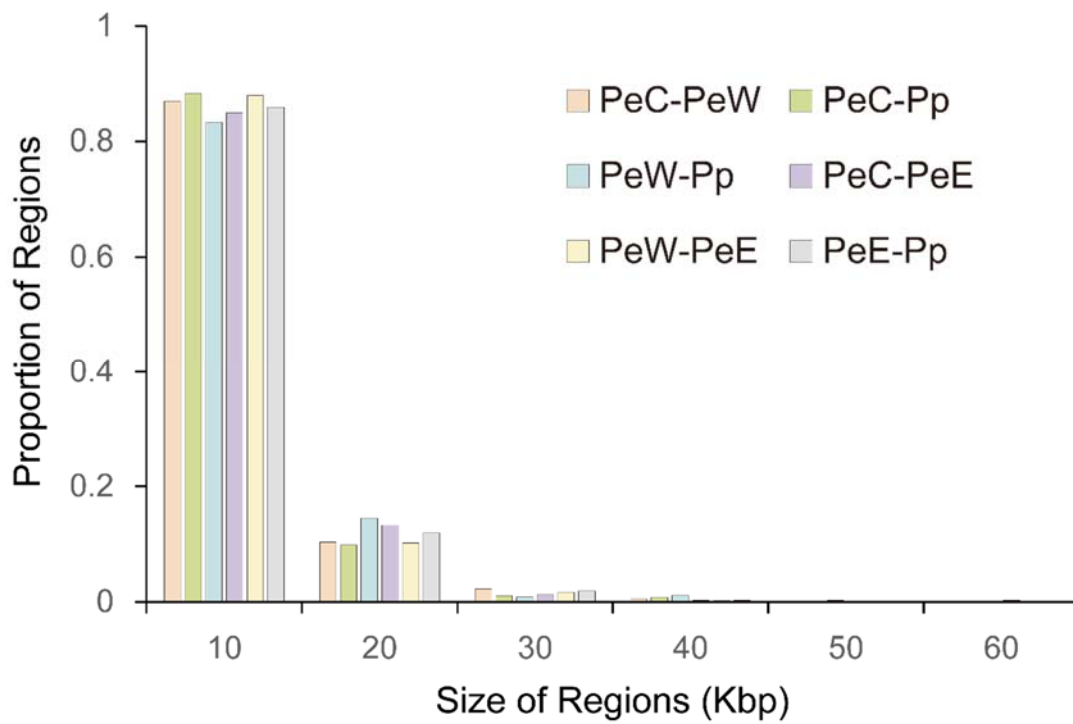

**Fig. S14:** The size distributions of genomic islands displaying significantly high genetic differentiation for all pairwise comparisons.

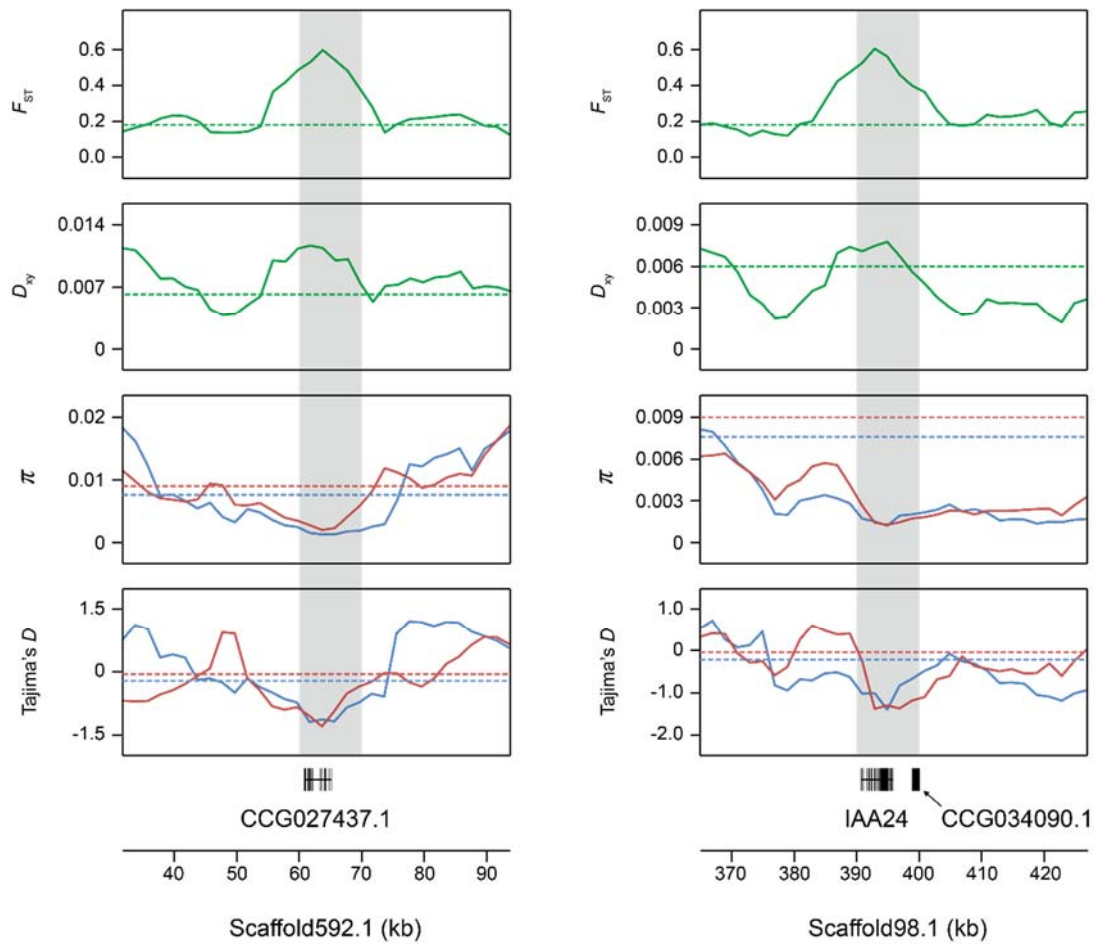

**Fig. S15:** Distribution of population genomic parameters around two examples of islands (gray bar) between lineages PeW (blue) and Pp (red).  $F_{ST}$ ,  $D_{xy}$ ,  $\pi$  and Tajima's  $D$  values are plotted using a 10 kb sliding window with 2 kb steps. Horizontal dashed lines represent mean whole-genome of corresponding values. Positively selected genes within the islands are shown at the bottom.



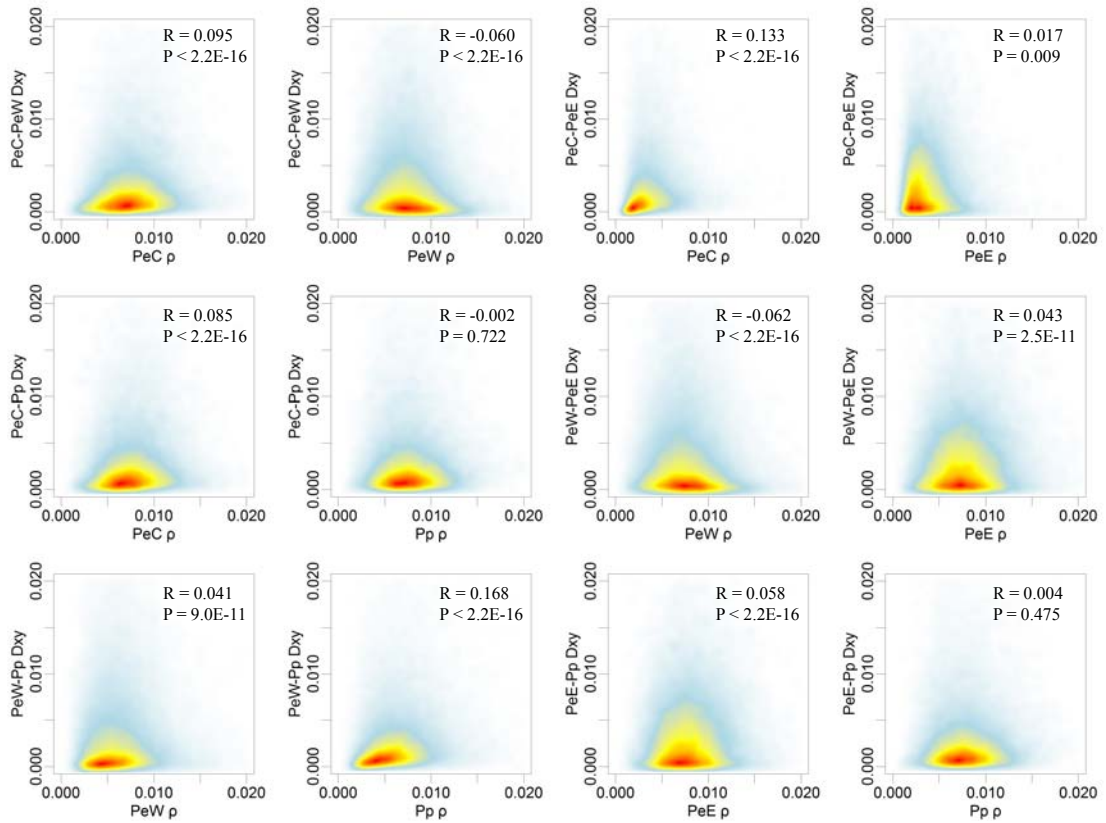

**Fig. S16:** Correlation of population-scaled recombination rates ( $\rho$ ) and  $D_{xy}$ . Scatter plots display genome-wide values of two variables in dots over 10 Kbp non-overlapping windows. The red to yellow to blue gradient indicates decreased density of observed events at a given location in the graph. Correlation and significance are tested with Pearson's correlation test.

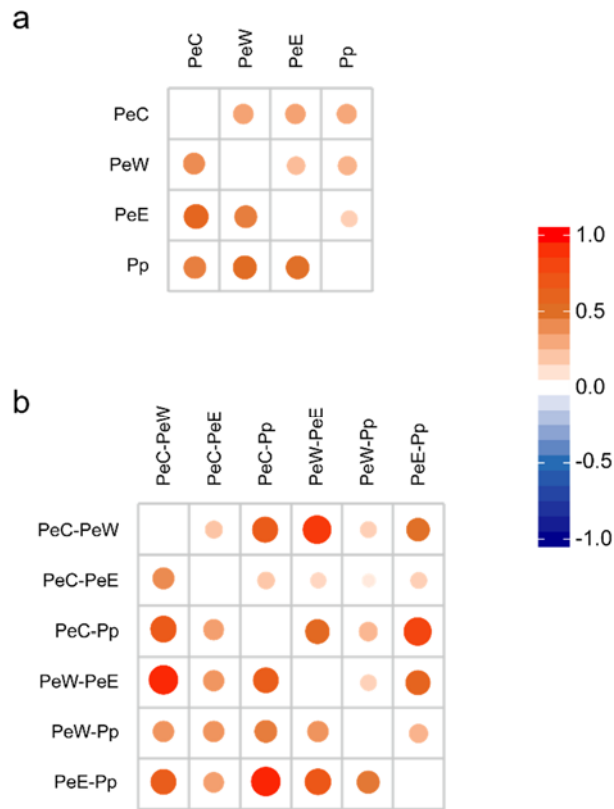

**Fig. S17:** Correlations of 10-kb window-based estimates of **(a)** intra-population summary statistics (above diagonal: population-scaled recombination rate  $\rho$ ; below the diagonal: nucleotide diversity  $\pi$ ) between populations and **(b)** inter-populations statistics (above diagonal: genetic divergence  $F_{ST}$ ; below the diagonal: absolute divergence  $D_{xy}$ ) of population pairs. Red circles indicate a positive correlation, blue a negative one. The color intensity and circle size are proportional to Spearman's correlation coefficient.

## SI Tables:

**Table S1:** Overview of sample information and sequencing statistics.

| Sample ID | Species                   | Country/Region    | Latitude | Longitude | Clean Reads (Gbp) | Map Ratio (%) | Genome Coverage (%) | Effective Depth |
|-----------|---------------------------|-------------------|----------|-----------|-------------------|---------------|---------------------|-----------------|
| PPr01     | <i>Populus pruinosa</i>   | Xinjiang, China   | N40°17'  | E80°21'   | 7.33              | 91.37         | 89.8                | 13.54           |
| PPr02     | <i>Populus pruinosa</i>   | Xinjiang, China   | N40°17'  | E80°21'   | 3.64              | 94.97         | 82.48               | 7.08            |
| PPr03     | <i>Populus pruinosa</i>   | Xinjiang, China   | N40°19'  | E79°55'   | 14.14             | 91.65         | 91.57               | 26.07           |
| PPr04A    | <i>Populus pruinosa</i>   | Xinjiang, China   | N40°19'  | E79°55'   | 4.82              | 93.13         | 87.91               | 9.21            |
| PPr05     | <i>Populus pruinosa</i>   | Xinjiang, China   | N39°22'  | E78°11'   | 7.98              | 86.16         | 90.27               | 13.78           |
| PPr06     | <i>Populus pruinosa</i>   | Xinjiang, China   | N39°22'  | E78°11'   | 4.37              | 95.68         | 82.09               | 8.61            |
| PPr07     | <i>Populus pruinosa</i>   | Xinjiang, China   | N39°21'  | E78°05'   | 8.54              | 83.1          | 90.47               | 14.23           |
| PPr08     | <i>Populus pruinosa</i>   | Xinjiang, China   | N39°21'  | E78°05'   | 3.46              | 96.52         | 82.13               | 6.85            |
| PPr09     | <i>Populus pruinosa</i>   | Xinjiang, China   | N38°02'  | E76°58'   | 11.25             | 92.98         | 91.24               | 21.09           |
| PPr10     | <i>Populus pruinosa</i>   | Xinjiang, China   | N38°02'  | E76°58'   | 4.18              | 94.91         | 85.02               | 8.14            |
| PPr11     | <i>Populus pruinosa</i>   | Xinjiang, China   | N37°34'  | E79°38'   | 5.81              | 95.5          | 87.87               | 11.38           |
| PPr12     | <i>Populus pruinosa</i>   | Xinjiang, China   | N37°11'  | E82°47'   | 3.26              | 93.95         | 83.75               | 6.29            |
| PPr13     | <i>Populus pruinosa</i>   | Xinjiang, China   | N37°11'  | E82°47'   | 7.93              | 93.33         | 89.89               | 14.83           |
| PPr14     | <i>Populus pruinosa</i>   | Xinjiang, China   | N41°15'  | E84°12'   | 6.3               | 95.03         | 87.51               | 12.28           |
| PPr15     | <i>Populus pruinosa</i>   | Xinjiang, China   | N41°15'  | E84°12'   | 4.01              | 94.05         | 86.32               | 7.74            |
| PPr16     | <i>Populus pruinosa</i>   | Xinjiang, China   | N41°00'  | E83°20'   | 9.58              | 91.77         | 91.08               | 17.58           |
| PPr17     | <i>Populus pruinosa</i>   | Xinjiang, China   | N41°00'  | E83°20'   | 5.59              | 95.17         | 86.01               | 10.9            |
| PPr18     | <i>Populus pruinosa</i>   | Xinjiang, China   | N41°00'  | E83°20'   | 3.18              | 94.17         | 81.33               | 6.09            |
| PPr19     | <i>Populus pruinosa</i>   | Xinjiang, China   | N40°43'  | E82°02'   | 8.66              | 93.1          | 90.09               | 16.15           |
| PPr20     | <i>Populus pruinosa</i>   | Xinjiang, China   | N38°02'  | E76°58'   | 4.42              | 95.51         | 85.57               | 8.61            |
| PPr21     | <i>Populus pruinosa</i>   | Xinjiang, China   | N38°02'  | E76°58'   | 2.82              | 94.8          | 81.86               | 5.44            |
| PPr23     | <i>Populus pruinosa</i>   | Xinjiang, China   | N40°43'  | E82°02'   | 3.08              | 95.09         | 80.35               | 6               |
| PPr24     | <i>Populus pruinosa</i>   | Xinjiang, China   | N40°43'  | E82°02'   | 2.92              | 95.78         | 75.4                | 5.76            |
| PPr25     | <i>Populus pruinosa</i>   | Xinjiang, China   | N40°43'  | E82°02'   | 4.37              | 95.69         | 78.85               | 8.62            |
| PPr26     | <i>Populus pruinosa</i>   | Xinjiang, China   | N40°42'  | E81° 40'  | 3.22              | 94.11         | 86.09               | 6.19            |
| PPr27     | <i>Populus pruinosa</i>   | Xinjiang, China   | N40°42'  | E81° 40'  | 3.7               | 93.4          | 87.26               | 7.05            |
| PPr28     | <i>Populus pruinosa</i>   | Xinjiang, China   | N40°26'  | E80°56'   | 3.55              | 93.38         | 87.18               | 6.78            |
| PPr29     | <i>Populus pruinosa</i>   | Xinjiang, China   | N40°26'  | E80°56'   | 3.47              | 94.5          | 85.91               | 6.72            |
| KY01      | <i>Populus pruinosa</i>   | Kyrgystan         | N41°19'  | E72°13'   | 13.17             | 92.29         | 86.93               | 24.05           |
| KY02      | <i>Populus pruinosa</i>   | Kyrgystan         | N41°19'  | E72°13'   | 8.9               | 93.97         | 85.17               | 16.59           |
| KY03      | <i>Populus pruinosa</i>   | Kyrgystan         | N41°19'  | E72°13'   | 6.83              | 93.11         | 80.86               | 12.83           |
| KY04      | <i>Populus pruinosa</i>   | Kyrgystan         | N41°19'  | E72°13'   | 7.38              | 92.45         | 74.71               | 11.2            |
| KY05      | <i>Populus pruinosa</i>   | Kyrgystan         | N41°19'  | E72°13'   | 14.64             | 93.52         | 86.66               | 26.8            |
| KY06      | <i>Populus pruinosa</i>   | Kyrgystan         | N41°19'  | E72°13'   | 9.08              | 93.58         | 83.17               | 17.19           |
| ALG01     | <i>Populus euphratica</i> | Ghardaia, Algeria | N32°24'  | E4°14'    | 14.74             | 90.58         | 88.22               | 27.26           |
| ALG02     | <i>Populus euphratica</i> | Ghardaia, Algeria | N32°24'  | E4°14'    | 6.64              | 94.15         | 85.43               | 12.84           |
| ALG03     | <i>Populus euphratica</i> | Ghardaia, Algeria | N32°24'  | E4°14'    | 6.53              | 94.66         | 85.82               | 12.67           |

|       |                           |                           |         |         |       |       |       |       |
|-------|---------------------------|---------------------------|---------|---------|-------|-------|-------|-------|
| ALG04 | <i>Populus euphratica</i> | Ghardaia, Algeria         | N32°24' | E4°14'  | 6.53  | 94.32 | 86.29 | 12.62 |
| ALG05 | <i>Populus euphratica</i> | Ghardaia, Algeria         | N32°24' | E4°14'  | 6.61  | 94.9  | 86.26 | 12.81 |
| XBY02 | <i>Populus euphratica</i> | Alicante, Spain           | N38°17' | W0°42'  | 3.67  | 90.28 | 82.38 | 6.78  |
| XBY04 | <i>Populus euphratica</i> | Alicante, Spain           | N38°17' | W0°42'  | 4.47  | 88.27 | 81.97 | 8.14  |
| XBY05 | <i>Populus euphratica</i> | Alicante, Spain           | N38°17' | W0°42'  | 4.05  | 91.11 | 82.95 | 7.54  |
| XBY06 | <i>Populus euphratica</i> | Alicante, Spain           | N38°17' | W0°42'  | 6.03  | 92.71 | 84.67 | 11.47 |
| XBY08 | <i>Populus euphratica</i> | Alicante, Spain           | N38°17' | W0°42'  | 14.05 | 92.21 | 88.36 | 26.68 |
| XBY10 | <i>Populus euphratica</i> | Alicante, Spain           | N38°17' | W0°42'  | 3.93  | 93.75 | 82.77 | 7.55  |
| XBY11 | <i>Populus euphratica</i> | Alicante, Spain           | N38°17' | W0°42'  | 5.97  | 89.74 | 85.26 | 10.98 |
| XBY13 | <i>Populus euphratica</i> | Alicante, Spain           | N38°17' | W0°42'  | 4.38  | 92.46 | 84.01 | 8.26  |
| Peu20 | <i>Populus euphratica</i> | Israel                    | N30°49' | E34°46' | 6.24  | 77.3  | 86.59 | 9.86  |
| Peu21 | <i>Populus euphratica</i> | Israel                    | N30°49' | E34°46' | 5.5   | 93.65 | 85.27 | 10.61 |
| Peu22 | <i>Populus euphratica</i> | Israel                    | N30°49' | E34°46' | 7.41  | 88.55 | 90.02 | 13.51 |
| Peu23 | <i>Populus euphratica</i> | Israel                    | N30°49' | E34°45' | 10.81 | 89.75 | 91.29 | 19.55 |
| Peu24 | <i>Populus euphratica</i> | Israel                    | N30°49' | E34°45' | 7.4   | 90.39 | 90.18 | 13.74 |
| Peu26 | <i>Populus euphratica</i> | Israel                    | N30°49' | E34°45' | 3.86  | 88.16 | 87.41 | 6.98  |
| Peu27 | <i>Populus euphratica</i> | Israel                    | N30°49' | E34°45' | 5.14  | 88.66 | 88.83 | 9.35  |
| Peu28 | <i>Populus euphratica</i> | Israel                    | N30°49' | E34°45' | 5.52  | 50.57 | 86.01 | 5.58  |
| YiL11 | <i>Populus euphratica</i> | Azarbayjan-e Sharqi, Iran | N38°50' | E46°8'  | 6.11  | 95.47 | 91.68 | 12.08 |
| YiL12 | <i>Populus euphratica</i> | Azarbayjan-e Sharqi, Iran | N38°52' | E46° 5' | 4.55  | 95.67 | 87.3  | 9     |
| YL058 | <i>Populus euphratica</i> | Azarbayjan-e Sharqi, Iran | N38°50' | E46°7'  | 6.42  | 94.76 | 87.25 | 12.41 |
| YL059 | <i>Populus euphratica</i> | Azarbayjan-e Sharqi, Iran | N38°52' | E46°3'  | 5.83  | 94.09 | 84.86 | 11.05 |
| YL060 | <i>Populus euphratica</i> | Azarbayjan-e Sharqi, Iran | N38°50' | E46°9'  | 5.75  | 96.43 | 83.42 | 11.29 |
| YiL03 | <i>Populus euphratica</i> | Bushehr, Iran             | N28°55' | E50°50' | 6.11  | 94.68 | 87.2  | 11.9  |
| YiL04 | <i>Populus euphratica</i> | Bushehr, Iran             | N28°55' | E50°51' | 5.1   | 97.12 | 85.99 | 10.12 |
| YL052 | <i>Populus euphratica</i> | Bushehr, Iran             | N28°55' | E50°50' | 4.3   | 93.12 | 75.06 | 8.24  |
| YL053 | <i>Populus euphratica</i> | Bushehr, Iran             | N28°55' | E50°51' | 5.01  | 93.73 | 78.13 | 9.66  |
| YL054 | <i>Populus euphratica</i> | Bushehr, Iran             | N28°55' | E50°51' | 6.58  | 94.14 | 82.56 | 12.74 |
| YiL07 | <i>Populus euphratica</i> | Esfahan, Iran             | N34°12' | E51°31' | 6.01  | 93.31 | 88.72 | 11.52 |
| YiL08 | <i>Populus euphratica</i> | Esfahan, Iran             | N34°12' | E51°31' | 4.88  | 95.79 | 85.71 | 9.58  |
| YL040 | <i>Populus euphratica</i> | Esfahan, Iran             | N34°7'  | E51°29' | 13.86 | 90.92 | 86.33 | 25.08 |
| YL041 | <i>Populus euphratica</i> | Esfahan, Iran             | N34°12' | E51°31' | 6.32  | 93.16 | 81.35 | 11.96 |
| YL042 | <i>Populus euphratica</i> | Esfahan, Iran             | N34°12' | E51°31' | 6.08  | 94.62 | 82.59 | 11.66 |
| YiL01 | <i>Populus euphratica</i> | Gilan, Iran               | N36°40' | E49°25' | 5.75  | 96.88 | 87.01 | 11.4  |
| YiL02 | <i>Populus euphratica</i> | Gilan, Iran               | N36°40' | E49°25' | 6     | 93.54 | 88.01 | 11.55 |
| YL055 | <i>Populus euphratica</i> | Gilan, Iran               | N36°40' | E49°25' | 4.67  | 96.38 | 78.36 | 9.1   |
| YL056 | <i>Populus euphratica</i> | Gilan, Iran               | N36°14' | E49°26' | 4.72  | 95.24 | 79.16 | 9.18  |
| YL057 | <i>Populus euphratica</i> | Gilan, Iran               | N36°13' | E49°26' | 6.1   | 96.4  | 82.61 | 11.97 |
| YiL13 | <i>Populus euphratica</i> | Khorasan-e Razavi, Iran   | N36°16' | E59°47' | 5.95  | 96.54 | 92.2  | 12.03 |
| YiL14 | <i>Populus euphratica</i> | Khorasan-e Razavi, Iran   | N36°16' | E59°47' | 6.13  | 95.14 | 91.81 | 12.23 |
| YiL17 | <i>Populus euphratica</i> | Khorasan-e Razavi, Iran   | N36°18' | E61°9'  | 5.96  | 95.49 | 91.66 | 11.94 |
| YiL18 | <i>Populus euphratica</i> | Khorasan-e Razavi, Iran   | N36°18' | E61° 8' | 5.9   | 96.15 | 91.94 | 11.9  |
| YL033 | <i>Populus euphratica</i> | Khorasan-e Razavi, Iran   | N36°16' | E59°47' | 14.91 | 92.98 | 91.57 | 28.57 |
| YL034 | <i>Populus euphratica</i> | Khorasan-e Razavi, Iran   | N36°16' | E59°47' | 7.25  | 94.1  | 86.41 | 14.07 |

|        |                           |                             |         |          |       |       |       |       |
|--------|---------------------------|-----------------------------|---------|----------|-------|-------|-------|-------|
| YL043  | <i>Populus euphratica</i> | Khorasan-e Razavi, Iran     | N36°17' | E61°9'   | 13.63 | 91.58 | 86.75 | 21.81 |
| YL044  | <i>Populus euphratica</i> | Khorasan-e Razavi, Iran     | N36°17' | E61°9'   | 4.95  | 95.92 | 84.02 | 9.72  |
| YL045  | <i>Populus euphratica</i> | Khorasan-e Razavi, Iran     | N36°19' | E61°8'   | 5.81  | 95.23 | 86.85 | 11.36 |
| YL046  | <i>Populus euphratica</i> | Khorasan-e Razavi, Iran     | N36°17' | E61°9'   | 4.99  | 95.53 | 85.92 | 9.99  |
| YiL23  | <i>Populus euphratica</i> | Khorasan-e Shemali, Iran    | N37°59' | E56°18'  | 4.75  | 97.21 | 86.58 | 9.47  |
| YiL24  | <i>Populus euphratica</i> | Khorasan-e Shemali, Iran    | N37°59' | E56°18'  | 5.95  | 93.14 | 89.6  | 11.44 |
| YL029  | <i>Populus euphratica</i> | Khorasan-e Shemali, Iran    | N37°55' | E56°10'  | 4.99  | 96.53 | 83.04 | 9.72  |
| YL030  | <i>Populus euphratica</i> | Khorasan-e Shemali, Iran    | N37°59' | E56°17'  | 6.98  | 82.4  | 84.38 | 12.23 |
| YL031  | <i>Populus euphratica</i> | Khorasan-e Shemali, Iran    | N39°46' | E56°16'  | 6.34  | 86.37 | 81.84 | 11.24 |
| YL032  | <i>Populus euphratica</i> | Khorasan-e Shemali, Iran    | N37°58' | E56°17'  | 5.27  | 93.11 | 77.49 | 9.96  |
| YiL19  | <i>Populus euphratica</i> | Khuzestan, Iran             | N32°15' | E48°20'  | 4.75  | 96.97 | 85.24 | 9.42  |
| YL035  | <i>Populus euphratica</i> | Khuzestan, Iran             | N32°15' | E48°20'  | 6.85  | 93.39 | 82.61 | 12.92 |
| YL036  | <i>Populus euphratica</i> | Khuzestan, Iran             | N32°15' | E48°20'  | 7.31  | 95.86 | 83.46 | 13.83 |
| YiL09  | <i>Populus euphratica</i> | Lorestan, Iran              | N33°35' | E47°52'  | 6     | 92.7  | 87.9  | 11.41 |
| YiL10  | <i>Populus euphratica</i> | Lorestan, Iran              | N33°33' | E47°51'  | 4.86  | 96.76 | 85.64 | 9.62  |
| YL037  | <i>Populus euphratica</i> | Lorestan, Iran              | N33°35' | E47°52'  | 11.4  | 94.78 | 81.53 | 21.82 |
| YL038  | <i>Populus euphratica</i> | Lorestan, Iran              | N33°34' | E47°52'  | 5.62  | 96.52 | 80.99 | 10.96 |
| YL039  | <i>Populus euphratica</i> | Lorestan, Iran              | N33°33' | E47°51'  | 6.56  | 96.03 | 79.86 | 12.54 |
| YiL21  | <i>Populus euphratica</i> | Semnan, Iran                | N35°10' | E52°26'  | 6.05  | 93.88 | 87.28 | 11.7  |
| YiL22  | <i>Populus euphratica</i> | Semnan, Iran                | N35° 8' | E52°27'  | 4.47  | 96.89 | 84.08 | 8.87  |
| YL025  | <i>Populus euphratica</i> | Semnan, Iran                | N35°13' | E52°29'  | 8.88  | 95.38 | 85.05 | 16.61 |
| YL026  | <i>Populus euphratica</i> | Semnan, Iran                | N35°16' | E52°23'  | 8.55  | 86.9  | 85.11 | 15.36 |
| YL027  | <i>Populus euphratica</i> | Semnan, Iran                | N35°13' | E52°19'  | 4.92  | 96.15 | 81.36 | 9.49  |
| YL028  | <i>Populus euphratica</i> | Semnan, Iran                | N35°11' | E52°30'  | 6.61  | 93.79 | 82.1  | 11.63 |
| YiL05  | <i>Populus euphratica</i> | Sistan va Baluchestan, Iran | N29°27' | E60°50'  | 5.98  | 94.35 | 85.98 | 11.63 |
| YiL06  | <i>Populus euphratica</i> | Sistan va Baluchestan, Iran | N29°27' | E60°50'  | 5.92  | 92.63 | 85.72 | 11.17 |
| YL047  | <i>Populus euphratica</i> | Sistan va Baluchestan, Iran | N29°27' | E60°55'  | 5.44  | 95.66 | 79.48 | 10.49 |
| YL048  | <i>Populus euphratica</i> | Sistan va Baluchestan, Iran | N29°27' | E60°55'  | 8.5   | 95.98 | 82.96 | 16.54 |
| YiL15  | <i>Populus euphratica</i> | Yazd, Iran                  | N32° 2' | E54°12'  | 5.29  | 97.08 | 90.89 | 10.64 |
| YiL16  | <i>Populus euphratica</i> | Yazd, Iran                  | N32° 2' | E54°12'  | 6.01  | 95.17 | 93.97 | 11.86 |
| YL049  | <i>Populus euphratica</i> | Yazd, Iran                  | N32°2'  | E54°14'  | 6.06  | 92.82 | 85.56 | 11.27 |
| YL050  | <i>Populus euphratica</i> | Yazd, Iran                  | N32°2'  | E54°12'  | 6.85  | 95.43 | 88.27 | 13.15 |
| YL051  | <i>Populus euphratica</i> | Yazd, Iran                  | N32°1'  | E54°12'  | 7.28  | 93.33 | 85.58 | 13.61 |
| Peu18  | <i>Populus euphratica</i> | Inner Mongolia, China       | N42°01' | E101°03' | 3.15  | 96.86 | 91.32 | 6.4   |
| Peu19A | <i>Populus euphratica</i> | Inner Mongolia, China       | N42°01' | E101°03' | 3.63  | 95.44 | 85.83 | 7.29  |
| Peu44  | <i>Populus euphratica</i> | Inner Mongolia, China       | N42°01' | E101°03' | 6.18  | 97.71 | 94.32 | 12.63 |
| Peu45  | <i>Populus euphratica</i> | Inner Mongolia, China       | N42°01' | E101°03' | 3.41  | 97.49 | 87.51 | 6.94  |
| Peu01A | <i>Populus euphratica</i> | Xinjiang, China             | N46°08' | E85°38'  | 3.6   | 96.16 | 92.41 | 7.26  |
| Peu02  | <i>Populus euphratica</i> | Xinjiang, China             | N46°08' | E85°38'  | 6.11  | 95.7  | 94.19 | 12.22 |
| Peu03A | <i>Populus euphratica</i> | Xinjiang, China             | N41°39' | E80°46'  | 3.68  | 96.22 | 92.65 | 7.43  |
| Peu04A | <i>Populus euphratica</i> | Xinjiang, China             | N40°17' | E80°21'  | 3.85  | 96.35 | 92.76 | 7.79  |
| Peu05  | <i>Populus euphratica</i> | Xinjiang, China             | N40°19' | E79°55'  | 4.33  | 97.09 | 92.3  | 8.85  |
| Peu06A | <i>Populus euphratica</i> | Xinjiang, China             | N39°22' | E78°11'  | 4.31  | 94.86 | 93.49 | 8.48  |
| Peu07  | <i>Populus euphratica</i> | Xinjiang, China             | N39°22' | E78°11'  | 10.44 | 95.66 | 95.17 | 20.62 |

|        |                           |                 |         |         |       |       |       |       |
|--------|---------------------------|-----------------|---------|---------|-------|-------|-------|-------|
| Peu08A | <i>Populus euphratica</i> | Xinjiang, China | N37°06' | E80°58' | 5.11  | 96.32 | 93.62 | 10.34 |
| Peu09  | <i>Populus euphratica</i> | Xinjiang, China | N37°11' | E82°47' | 5.71  | 94.68 | 93.97 | 11.25 |
| Peu10A | <i>Populus euphratica</i> | Xinjiang, China | N38°11' | E85°00' | 4.08  | 95.18 | 92.62 | 8.16  |
| Peu11  | <i>Populus euphratica</i> | Xinjiang, China | N38°41' | E86°55' | 10.59 | 93.22 | 94.98 | 20.24 |
| Peu13A | <i>Populus euphratica</i> | Xinjiang, China | N39°47' | E88°22' | 4.31  | 95.77 | 93.1  | 8.66  |
| Peu14  | <i>Populus euphratica</i> | Xinjiang, China | N40°40' | E87°35' | 3.38  | 97.12 | 90.31 | 6.92  |
| Peu15A | <i>Populus euphratica</i> | Xinjiang, China | N41°05' | E86°33' | 4.32  | 96.4  | 93.18 | 8.76  |
| Peu16A | <i>Populus euphratica</i> | Xinjiang, China | N41°15' | E84°12' | 3.19  | 95.03 | 90.42 | 6.38  |
| Peu17A | <i>Populus euphratica</i> | Xinjiang, China | N41°00' | E83°20' | 4.19  | 95.08 | 92.91 | 8.37  |
| Peu31  | <i>Populus euphratica</i> | Xinjiang, China | N46°08' | E85°38' | 2.76  | 97.73 | 87.36 | 5.64  |
| Peu32  | <i>Populus euphratica</i> | Xinjiang, China | N41°39' | E80°46' | 5.82  | 96.89 | 91.46 | 11.79 |
| Peu33  | <i>Populus euphratica</i> | Xinjiang, China | N41°39' | E80°46' | 2.79  | 96.26 | 87.12 | 5.54  |
| Peu34  | <i>Populus euphratica</i> | Xinjiang, China | N40°17' | E80°21' | 2.51  | 97.88 | 85.93 | 5.14  |
| Peu35  | <i>Populus euphratica</i> | Xinjiang, China | N40°19' | E79°55' | 2.92  | 97.67 | 81.98 | 5.97  |
| Peu37  | <i>Populus euphratica</i> | Xinjiang, China | N37°34' | E79°38' | 5.65  | 97.15 | 92.24 | 11.45 |
| Peu38  | <i>Populus euphratica</i> | Xinjiang, China | N37°34' | E79°38' | 2.62  | 97.31 | 89.09 | 5.26  |
| Peu39  | <i>Populus euphratica</i> | Xinjiang, China | N37°06' | E80°58' | 5.85  | 97.84 | 92.14 | 11.95 |
| Peu40  | <i>Populus euphratica</i> | Xinjiang, China | N37°11' | E82°47' | 5.45  | 95.32 | 93.43 | 10.8  |
| Peu41  | <i>Populus euphratica</i> | Xinjiang, China | N39°47' | E88°22' | 4.82  | 97.95 | 91.31 | 9.89  |
| Peu42  | <i>Populus euphratica</i> | Xinjiang, China | N40°40' | E87°35' | 8.17  | 97.24 | 94.24 | 16.64 |
| Peu43  | <i>Populus euphratica</i> | Xinjiang, China | N41°05' | E86°33' | 3.9   | 97.52 | 89.71 | 7.93  |
| Peu46  | <i>Populus euphratica</i> | Xinjiang, China | N46°08' | E85°38' | 3.13  | 97.72 | 85.88 | 6.41  |
| Peu47  | <i>Populus euphratica</i> | Xinjiang, China | N41°39' | E80°46' | 3.46  | 96.72 | 89.34 | 6.92  |
| Peu48  | <i>Populus euphratica</i> | Xinjiang, China | N39°38' | E78°24' | 4.21  | 97.41 | 91.79 | 8.59  |
| Peu49  | <i>Populus euphratica</i> | Xinjiang, China | N38°11' | E85°00' | 4.35  | 97.66 | 91.61 | 8.86  |
| Peu50  | <i>Populus euphratica</i> | Xinjiang, China | N41°15' | E84°12' | 4.61  | 97.58 | 90.75 | 9.43  |
| Peu51  | <i>Populus euphratica</i> | Xinjiang, China | N41°00' | E83°20' | 7.48  | 94.27 | 92.27 | 14.78 |
| Peu52  | <i>Populus euphratica</i> | Xinjiang, China | N40°40' | E81°44' | 4.07  | 96.43 | 93    | 8.25  |
| Peu53  | <i>Populus euphratica</i> | Xinjiang, China | N40°40' | E81°44' | 3.78  | 97.03 | 91.93 | 7.7   |
| Peu54  | <i>Populus euphratica</i> | Xinjiang, China | N40°27' | E80°59' | 3.82  | 96.31 | 92.99 | 7.73  |
| Peu56  | <i>Populus euphratica</i> | Xinjiang, China | N38°23' | E77°22' | 4.15  | 96.24 | 93.16 | 8.39  |

**Table S2:** Population genetic summary statistics. Mean ( $\pm$ standard deviation) values of nucleotide diversity  $\pi$ , Tajima's  $D$  statistic, pairwise relative measure of differentiation ( $F_{ST}$ , above the diagonal) and absolute divergence ( $D_{xy}$ , below the diagonal) between all four populations. The number of pairwise fixed differences is given in parentheses.

| Species              | Lineage | Number of individuals | $\pi$<br>( $\times 10^{-3}$ ) | Tajima's $D$     | $D_{xy}$ ( $\times 10^{-3}$ ) / $F_{ST}$ (fixed SNPs) |                             |                              |                             |
|----------------------|---------|-----------------------|-------------------------------|------------------|-------------------------------------------------------|-----------------------------|------------------------------|-----------------------------|
|                      |         |                       |                               |                  | PeC                                                   | PeW                         | PeE                          | Pp                          |
| <i>P. euphratica</i> | PeC     | 28                    | 5.17 $\pm$ 2.67               | -0.04 $\pm$ 0.80 | -                                                     | 0.33 $\pm$ 0.13<br>(75,467) | 0.19 $\pm$ 0.09<br>(1,876)   | 0.31 $\pm$ 0.11<br>(9,546)  |
|                      | PeW     | 21                    | 6.59 $\pm$ 4.23               | -0.22 $\pm$ 0.99 | 7.73 $\pm$ 2.85                                       | -                           | 0.36 $\pm$ 0.15<br>(123,064) | 0.19 $\pm$ 0.08<br>(16,059) |
|                      | PeE     | 6                     | 5.07 $\pm$ 2.75               | 0.00 $\pm$ 0.59  | 3.88 $\pm$ 2.04                                       | 7.82 $\pm$ 2.92             | -                            | 0.33 $\pm$ 0.12<br>(26,454) |
| <i>P. pruinosa</i>   | Pp      | 27                    | 8.30 $\pm$ 4.22               | -0.02 $\pm$ 0.78 | 7.82 $\pm$ 2.71                                       | 6.34 $\pm$ 2.79             | 8.07 $\pm$ 2.80              | -                           |

**Table S3:** Relative likelihood of the different models shown in Fig. S6.

| <b>Model</b>          | <b>Max(log<sub>10</sub>(likelihood))<sup>a</sup></b> | <b>No. of parameters</b> | <b>AIC<sup>b</sup></b> | <b>δ<sup>b</sup></b> | <b>Model normalized relative likelihood (w)<sup>b</sup></b> |
|-----------------------|------------------------------------------------------|--------------------------|------------------------|----------------------|-------------------------------------------------------------|
| mWP plus <sup>c</sup> | -118,029,395                                         | 34                       | 543,545,518            | 0                    | 1                                                           |
| mWP                   | -118,040,150                                         | 30                       | 543,595,041            | 49,523               | 0                                                           |
| sWP                   | -118,063,925                                         | 30                       | 543,704,528            | 159,010              | 0                                                           |
| sPW                   | -118,068,276                                         | 30                       | 543,724,564            | 179,046              | 0                                                           |
| sPC                   | -118,284,097                                         | 30                       | 544,718,455            | 1,172,937            | 0                                                           |
| sCP                   | -118,287,563                                         | 30                       | 544,734,420            | 1,188,902            | 0                                                           |
| mCE                   | -118,287,632                                         | 30                       | 544,734,736            | 1,189,218            | 0                                                           |
| sEC                   | -118,289,911                                         | 30                       | 544,745,230            | 1,199,712            | 0                                                           |
| sCE                   | -118,294,500                                         | 30                       | 544,766,366            | 1,220,848            | 0                                                           |
| mCW                   | -118,311,173                                         | 30                       | 544,843,148            | 1,297,630            | 0                                                           |
| sCW                   | -118,313,080                                         | 30                       | 544,851,928            | 1,306,411            | 0                                                           |
| sWC                   | -118,315,292                                         | 30                       | 544,862,114            | 1,316,596            | 0                                                           |
| mCP                   | -118,325,432                                         | 30                       | 544,908,814            | 1,363,296            | 0                                                           |
| sEW                   | -118,349,493                                         | 30                       | 545,019,616            | 1,474,098            | 0                                                           |
| mWE                   | -118,350,792                                         | 30                       | 545,025,597            | 1,480,080            | 0                                                           |
| sEP                   | -118,356,446                                         | 30                       | 545,051,636            | 1,506,118            | 0                                                           |
| sWE                   | -118,357,088                                         | 30                       | 545,054,591            | 1,509,073            | 0                                                           |
| mEP                   | -118,360,647                                         | 30                       | 545,070,983            | 1,525,465            | 0                                                           |
| sPE                   | -118,363,153                                         | 30                       | 545,082,522            | 1,537,004            | 0                                                           |

<sup>a</sup>Based on the best likelihood among the 50 independent runs for each model

<sup>b</sup>The calculation of AIC, δ and w are according to the methods shown in <sup>3</sup>

<sup>c</sup>The best-fitting model is a modified version of model ‘mWP’ with exponential change in population size following their divergence.



**Table S4:** Inferred parameters estimates with 95% confidence intervals for the best-fitting demographic scenario modelled in fastsimcoal2, with parameter tags corresponding to the models shown in Fig. S7. Estimates of gene flow between populations are given in the migration fraction per generation.

| Parameters | Point estimation | 95% confidence intervals |             |
|------------|------------------|--------------------------|-------------|
|            |                  | Lower bound              | Upper bound |
| NPeC       | 11,421           | 10,517                   | 12,350      |
| NPeW       | 21,749           | 20,874                   | 22,233      |
| NPeE       | 5,360            | 4,876                    | 6,035       |
| NPp        | 18,281           | 17,625                   | 18,669      |
| NancCE     | 44,222           | 34,370                   | 48,058      |
| NancWP     | 27,240           | 21,762                   | 31,272      |
| Nanc       | 9,608            | 5,803                    | 16,798      |
| NancC      | 7,743            | 7,227                    | 9,481       |
| NancW      | 6,985            | 5,643                    | 9,579       |
| NancE      | 37,468           | 28,970                   | 40,612      |
| NancP      | 44,242           | 34,667                   | 46,778      |
| TDIV       | 1,856,330        | 1,736,560                | 1,902,350   |
| TWP        | 877,700          | 800,930                  | 934,850     |
| TCE        | 80,490           | 75,080                   | 83,700      |
| mWC        | 1.11E-08         | 2.94E-09                 | 2.39E-07    |
| mEC        | 1.06E-05         | 7.20E-06                 | 1.21E-05    |
| mPC        | 3.08E-06         | 2.71E-06                 | 3.41E-06    |
| mCW        | 5.68E-09         | 2.96E-09                 | 1.39E-06    |
| mEW        | 5.33E-06         | 3.85E-06                 | 5.63E-06    |
| mPW        | 2.04E-06         | 1.69E-06                 | 2.55E-06    |
| mCE        | 4.68E-07         | 4.55E-09                 | 2.54E-06    |
| mWE        | 2.30E-07         | 4.36E-09                 | 6.06E-07    |
| mPE        | 1.24E-06         | 8.10E-07                 | 1.78E-06    |
| mCP        | 1.83E-05         | 1.76E-05                 | 1.94E-05    |
| mWP        | 4.95E-09         | 2.32E-09                 | 2.20E-07    |
| mEP        | 9.30E-09         | 2.27E-09                 | 2.51E-07    |
| maPaW      | 1.93E-06         | 7.87E-07                 | 2.75E-06    |
| maWaP      | 4.98E-06         | 4.31E-06                 | 5.59E-06    |
| maWaCE     | 1.45E-08         | 3.19E-09                 | 3.99E-07    |
| maCEaW     | 4.07E-06         | 3.78E-06                 | 4.36E-06    |
| maPaCE     | 7.01E-07         | 3.55E-07                 | 9.18E-07    |
| maCEaP     | 6.72E-09         | 2.55E-09                 | 4.01E-07    |
| maWPaCE    | 4.11E-09         | 1.81E-09                 | 3.95E-07    |
| maCEaWP    | 3.13E-06         | 1.18E-06                 | 3.92E-06    |

**Table S5:** Number of outlier windows and genomic islands after combining consecutive windows for all pairwise comparisons. The number of genes and Positively Selected Genes (PSGs) within these islands are also counted. Asterisks designate significantly higher proportions of PSGs in these islands by Chi-squared test (\*\*\*) $P$ -value  $< 1E-8$ ).

| <b>Pop1</b>  | <b>Pop2</b> | <b># of outlier windows</b> | <b># of genomic islands</b> | <b># of genes in these islands</b> | <b># of PSGs in these islands</b> |
|--------------|-------------|-----------------------------|-----------------------------|------------------------------------|-----------------------------------|
| <b>PeC</b>   | <b>PeW</b>  | 464                         | 399                         | 388                                | 37***                             |
| <b>PeC</b>   | <b>Pp</b>   | 422                         | 369                         | 385                                | 28***                             |
| <b>PeW</b>   | <b>Pp</b>   | 426                         | 353                         | 345                                | 48***                             |
| <b>PeC</b>   | <b>PeE</b>  | 454                         | 385                         | 410                                | 6                                 |
| <b>PeW</b>   | <b>PeE</b>  | 464                         | 406                         | 319                                | 19***                             |
| <b>PeE</b>   | <b>Pp</b>   | 430                         | 369                         | 362                                | 37***                             |
| <b>Total</b> |             | 1,869                       | 1,533                       | 1,537                              | 108***                            |

**Table S6:** Number of shared outlier windows between paired comparisons.

|                | <b>PeC-PeW</b> | <b>PeC-Pp</b> | <b>PeW-Pp</b> | <b>PeC-PeE</b> | <b>PeW-PeE</b> |
|----------------|----------------|---------------|---------------|----------------|----------------|
| <b>PeC-Pp</b>  | 151            |               |               |                |                |
| <b>PeW-Pp</b>  | 44             | 49            |               |                |                |
| <b>PeC-PeE</b> | 18             | 20            | 11            |                |                |
| <b>PeW-PeE</b> | 228            | 91            | 41            | 7              |                |
| <b>PeE-Pp</b>  | 73             | 187           | 58            | 18             | 73             |

**Table S7:** Comparison of population genomic parameters (the mean  $\pm$  standard deviation values) of genomic islands with the rest of the genomic regions for all pairwise comparisons by Mann–Whitney U test. Note that the linkage disequilibrium was not measured for lineage PeE due to limited number of samples.

| Parameter      | Lineage | Genomic background   | Genomic islands      | P-value  |
|----------------|---------|----------------------|----------------------|----------|
| <b>PeC-PeW</b> |         |                      |                      |          |
| $F_{ST}$       |         | 0.3074 $\pm$ 0.1449  | 0.7194 $\pm$ 0.0739  | 2.20E-16 |
| $D_{xy}$       |         | 0.0076 $\pm$ 0.0028  | 0.0090 $\pm$ 0.0030  | 5.96E-10 |
| $\pi$          | PeC     | 0.0052 $\pm$ 0.0029  | 0.0030 $\pm$ 0.0020  | 2.20E-16 |
|                | PeW     | 0.0076 $\pm$ 0.0055  | 0.0027 $\pm$ 0.0025  | 2.20E-16 |
| Tajima's $D$   | PeC     | -0.0784 $\pm$ 0.7947 | -0.3626 $\pm$ 0.8447 | 1.80E-09 |
|                | PeW     | -0.2143 $\pm$ 0.9452 | -1.0453 $\pm$ 0.6735 | 2.20E-16 |
| LD ( $r^2$ )   | PeC     | 0.2980 $\pm$ 0.1342  | 0.3841 $\pm$ 0.2429  | 8.24E-09 |
|                | PeW     | 0.3098 $\pm$ 0.1598  | 0.2951 $\pm$ 0.2550  | 7.63E-08 |
| $\rho$         | PeC     | 0.0014 $\pm$ 0.0016  | 0.0004 $\pm$ 0.0007  | 2.20E-16 |
|                | PeW     | 0.0014 $\pm$ 0.0020  | 0.0008 $\pm$ 0.0013  | 1.26E-06 |
| <b>PeC-Pp</b>  |         |                      |                      |          |
| $F_{ST}$       |         | 0.2867 $\pm$ 0.1275  | 0.6466 $\pm$ 0.0697  | 2.20E-16 |
| $D_{xy}$       |         | 0.0077 $\pm$ 0.0026  | 0.0099 $\pm$ 0.0030  | 2.20E-16 |
| $\pi$          | PeC     | 0.0052 $\pm$ 0.0029  | 0.0028 $\pm$ 0.0020  | 2.20E-16 |
|                | Pp      | 0.0091 $\pm$ 0.0051  | 0.0049 $\pm$ 0.0029  | 2.20E-16 |
| Tajima's $D$   | PeC     | -0.0776 $\pm$ 0.7942 | -0.4729 $\pm$ 0.8707 | 2.67E-16 |
|                | Pp      | -0.0359 $\pm$ 0.7543 | -0.8221 $\pm$ 0.7257 | 2.20E-16 |
| LD ( $r^2$ )   | PeC     | 0.2981 $\pm$ 0.1343  | 0.3790 $\pm$ 0.2300  | 5.69E-09 |
|                | Pp      | 0.2898 $\pm$ 0.1372  | 0.4905 $\pm$ 0.2865  | 2.20E-16 |
| $\rho$         | PeC     | 0.0014 $\pm$ 0.0016  | 0.0004 $\pm$ 0.0007  | 2.20E-16 |
|                | Pp      | 0.0014 $\pm$ 0.0014  | 0.0002 $\pm$ 0.0005  | 2.20E-16 |
| <b>PeW-Pp</b>  |         |                      |                      |          |
| $F_{ST}$       |         | 0.1752 $\pm$ 0.0889  | 0.5287 $\pm$ 0.0726  | 2.20E-16 |
| $D_{xy}$       |         | 0.0062 $\pm$ 0.0027  | 0.0105 $\pm$ 0.0036  | 2.20E-16 |
| $\pi$          | PeW     | 0.0076 $\pm$ 0.0055  | 0.0043 $\pm$ 0.0036  | 2.20E-16 |
|                | Pp      | 0.0090 $\pm$ 0.0051  | 0.0063 $\pm$ 0.0040  | 2.20E-16 |
| Tajima's $D$   | PeW     | -0.2162 $\pm$ 0.9458 | -0.8443 $\pm$ 0.7864 | 2.20E-16 |
|                | Pp      | -0.0382 $\pm$ 0.7558 | -0.5227 $\pm$ 0.7899 | 2.20E-16 |
| LD ( $r^2$ )   | PeW     | 0.3095 $\pm$ 0.1595  | 0.3406 $\pm$ 0.2505  | 4.84E-01 |
|                | Pp      | 0.2911 $\pm$ 0.1392  | 0.3797 $\pm$ 0.2426  | 8.80E-08 |
| $\rho$         | PeW     | 0.0014 $\pm$ 0.0020  | 0.0008 $\pm$ 0.0016  | 7.41E-09 |
|                | Pp      | 0.0014 $\pm$ 0.0014  | 0.0006 $\pm$ 0.0008  | 2.20E-16 |
| <b>PeC-PeE</b> |         |                      |                      |          |
| $F_{ST}$       |         | 0.1886 $\pm$ 0.1000  | 0.5856 $\pm$ 0.0943  | 2.20E-16 |
| $D_{xy}$       |         | 0.0037 $\pm$ 0.0019  | 0.0076 $\pm$ 0.0025  | 2.20E-16 |

|                |     |                      |                      |          |
|----------------|-----|----------------------|----------------------|----------|
| $\pi$          | PeC | $0.0052 \pm 0.0029$  | $0.0034 \pm 0.0019$  | 2.20E-16 |
|                | PeE | $0.0054 \pm 0.0030$  | $0.0048 \pm 0.0029$  | 1.12E-04 |
| Tajima's $D$   | PeC | $-0.0760 \pm 0.7943$ | $-0.6019 \pm 0.7647$ | 2.20E-16 |
|                | PeE | $-0.0096 \pm 0.5700$ | $-0.0914 \pm 0.8144$ | 3.00E-04 |
| LD ( $r^2$ )   | PeC | $0.2973 \pm 0.1335$  | $0.4234 \pm 0.2227$  | 2.20E-16 |
|                | PeE | -                    | -                    | -        |
| $\rho$         | PeC | $0.0014 \pm 0.0016$  | $0.0007 \pm 0.0010$  | 2.20E-16 |
|                | PeE | $0.0013 \pm 0.0017$  | $0.0004 \pm 0.0008$  | 2.20E-16 |
| <b>PeW-PeE</b> |     |                      |                      |          |
| $F_{ST}$       |     | $0.3362 \pm 0.1703$  | $0.7878 \pm 0.0698$  | 2.20E-16 |
| $D_{xy}$       |     | $0.0077 \pm 0.0028$  | $0.0083 \pm 0.0027$  | 2.15E-03 |
| $\pi$          | PeW | $0.0076 \pm 0.0055$  | $0.0025 \pm 0.0023$  | 2.20E-16 |
|                | PeE | $0.0054 \pm 0.0030$  | $0.0037 \pm 0.0021$  | 2.20E-16 |
| Tajima's $D$   | PeW | $-0.2143 \pm 0.9454$ | $-1.0374 \pm 0.6512$ | 2.20E-16 |
|                | PeE | $-0.0098 \pm 0.5724$ | $-0.0694 \pm 0.6179$ | 9.37E-03 |
| LD ( $r^2$ )   | PeW | $0.3098 \pm 0.1598$  | $0.2788 \pm 0.2531$  | 3.23E-10 |
|                | PeE | -                    | -                    | -        |
| $\rho$         | PeW | $0.0014 \pm 0.0020$  | $0.0009 \pm 0.0012$  | 1.49E-01 |
|                | PeE | $0.0013 \pm 0.0017$  | $0.0004 \pm 0.0008$  | 1.05E-15 |
| <b>PeE-Pp</b>  |     |                      |                      |          |
| $F_{ST}$       |     | $0.3089 \pm 0.1362$  | $0.6808 \pm 0.0761$  | 2.20E-16 |
| $D_{xy}$       |     | $0.0079 \pm 0.0027$  | $0.0083 \pm 0.0035$  | 2.04E-01 |
| $\pi$          | PeE | $0.0054 \pm 0.0030$  | $0.0034 \pm 0.0020$  | 2.20E-16 |
|                | Pp  | $0.0091 \pm 0.0051$  | $0.0044 \pm 0.0032$  | 2.20E-16 |
| Tajima's $D$   | PeE | $-0.0090 \pm 0.5725$ | $-0.1658 \pm 0.5987$ | 1.11E-07 |
|                | Pp  | $-0.0340 \pm 0.7532$ | $-0.9748 \pm 0.6427$ | 2.20E-16 |
| LD ( $r^2$ )   | PeE | -                    | -                    | -        |
|                | Pp  | $0.2909 \pm 0.1387$  | $0.3904 \pm 0.2805$  | 2.53E-04 |
| $\rho$         | PeE | $0.0013 \pm 0.0017$  | $0.0004 \pm 0.0006$  | 3.10E-15 |
|                | Pp  | $0.0014 \pm 0.0014$  | $0.0005 \pm 0.0009$  | 2.20E-16 |

**Table S8:** Lists of positively selected genes (PSGs) with a significant nominal *P*-value (<0.01) for the HKA test and 95<sup>th</sup> percentile population branch statistic (PBS) values for lineages PeC, PeW and Pp. Note that some PSGs shared between lineages are listed twice.

| Gene ID     | Best Arabidopsis hit | Gene Name | Description                                             | PBS   | HKA      | Genomic islands  |
|-------------|----------------------|-----------|---------------------------------------------------------|-------|----------|------------------|
| <b>PeC</b>  |                      |           |                                                         |       |          |                  |
| CCG000110.1 | AT3G12560.1          | TRP3      | Telomere repeat-binding protein 3                       | 0.386 | 2.20E-16 | -                |
| CCG000133.2 | AT3G53830.1          |           |                                                         | 0.382 | 2.20E-16 | -                |
| CCG000211.1 | AT2G40140.1          |           | Zinc finger CCCH domain-containing protein 29           | 0.365 | 2.20E-16 | -                |
| CCG000279.1 | AT2G31600.1          |           |                                                         | 0.508 | 2.20E-16 | PeC-Pp; PeE-Pp   |
| CCG000305.2 | AT1G07950.1          | MED22B    | Mediator of RNA polymerase II transcription subunit 22b | 0.5   | 8.15E-03 | -                |
| CCG000359.1 | -                    |           |                                                         | 0.353 | 2.20E-16 | PeW-PeE          |
| CCG000371.1 | AT1G26761.1          |           |                                                         | 0.376 | 2.20E-16 | -                |
| CCG000375.1 | AT2G03250.1          |           |                                                         | 0.376 | 2.20E-16 | -                |
| CCG000627.1 | AT1G25425.1          | CLE43     | CLAVATA3/ESR (CLE)-related protein 43                   | 0.531 | 1.26E-07 | -                |
| CCG001025.1 | AT3G10910.1          | ATL72     | RING-H2 finger protein ATL72                            | 0.409 | 5.75E-04 | -                |
| CCG001718.1 | AT2G24350.1          |           |                                                         | 0.433 | 1.87E-09 | -                |
| CCG002106.1 | AT5G11380.1          |           |                                                         | 0.431 | 4.65E-15 | -                |
| CCG002491.1 | AT2G34540.2          |           |                                                         | 1.098 | 2.20E-16 | -                |
| CCG002528.1 | AT5G57620.1          | MYB36     | Transcription factor MYB36                              | 0.506 | 2.20E-16 | -                |
| CCG002866.1 | AT1G09700.1          | DRB1      | Double-stranded RNA-binding protein 1                   | 0.528 | 1.87E-09 | PeC-Pp           |
| CCG003726.1 | AT5G22090.1          |           | Protein FAF-like, chloroplastic                         | 0.374 | 2.20E-16 | PeE-Pp           |
| CCG003769.1 | AT1G70740.1          |           |                                                         | 0.37  | 7.43E-05 | PeC-PeW; PeW-PeE |
| CCG003781.1 | AT2G01505.1          | CLE16     | CLAVATA3/ESR (CLE)-related protein 16                   | 0.559 | 1.26E-07 | -                |
| CCG003907.1 | AT5G06570.1          | CXE15     | Probable carboxylesterase 15                            | 0.39  | 8.18E-12 | -                |
| CCG003911.2 | AT3G54750.3          |           |                                                         | 0.378 | 2.20E-16 | -                |
| CCG005859.1 | AT3G28690.2          |           |                                                         | 0.413 | 2.20E-16 | -                |
| CCG006332.1 | AT5G57015.1          | CKL12     | Casein kinase 1-like protein 12                         | 1.025 | 2.20E-16 | PeC-Pp; PeE-Pp   |
| CCG007424.1 | AT5G48820.2          | KRP3      | Cyclin-dependent kinase inhibitor 3                     | 0.488 | 3.50E-14 | -                |
| CCG007602.1 | AT3G12890.1          |           |                                                         | 0.461 | 1.87E-09 | PeE-Pp           |
| CCG007604.1 | AT5G60570.1          |           | F-box/kelch-repeat protein At5g60570                    | 0.495 | 2.20E-16 | -                |
| CCG007697.1 | AT4G36910.1          | CBSX1     | CBS domain-containing protein CBSX1, chloroplastic      | 0.586 | 1.87E-09 | -                |
| CCG008358.1 | AT1G32700.1          |           |                                                         | 1.848 | 2.52E-07 | -                |
| CCG008722.1 | AT1G76940.1          | NSRA      | Nuclear speckle RNA-binding protein A                   | 0.845 | 2.52E-07 | -                |
| CCG009176.2 | AT2G26070.1          | RTE1      | Protein REVERSION-TO-ETHYLENE SENSITIVITY1              | 0.444 | 5.75E-04 | -                |
| CCG009591.1 | AT1G15550.1          | GA3OX1    | Gibberellin 3-beta-dioxygenase 1                        | 0.862 | 5.75E-04 | -                |
| CCG010076.1 | AT4G10650.1          | DGP2      | DAR GTPase 2, mitochondrial                             | 0.484 | 1.87E-09 | -                |
| CCG010372.1 | AT1G75100.1          | JAC1      |                                                         | 0.384 | 2.20E-16 | -                |
| CCG010374.1 | AT4G16580.1          |           | Probable protein phosphatase 2C 55                      | 0.391 | 8.18E-12 | -                |
| CCG010383.1 | AT2G33750.1          | PUP2      | Purine permease 2                                       | 0.373 | 4.65E-15 | -                |
| CCG010761.1 | AT2G46310.1          | CRF5      | Ethylene-responsive transcription factor CRF5           | 0.382 | 4.26E-05 | -                |

|             |             |         |                                                       |       |          |                          |
|-------------|-------------|---------|-------------------------------------------------------|-------|----------|--------------------------|
| CCG010829.1 | AT2G46600.1 | KIC     | Calcium-binding protein KIC                           | 0.801 | 2.52E-07 | -                        |
| CCG011200.1 | AT3G10700.1 | GALAK   | Galacturonokinase                                     | 0.512 | 2.20E-16 | -                        |
| CCG011257.1 | AT2G11520.1 | CRCK3   | Calmodulin-binding receptor-like cytoplasmic kinase 3 | 0.363 | 2.20E-16 | -                        |
| CCG011362.1 | -           |         |                                                       | 1.025 | 2.52E-07 | -                        |
| CCG012315.1 | AT1G04940.1 | TIC20-I | Protein TIC 20-I, chloroplastic                       | 0.433 | 2.20E-16 | -                        |
| CCG012317.2 | AT1G35180.1 |         |                                                       | 0.377 | 2.20E-16 | -                        |
| CCG012319.1 | AT1G75450.1 | CKX5    | Cytokinin dehydrogenase 5                             | 0.372 | 2.20E-16 | PeC-Pp; PeE-Pp           |
| CCG012334.1 | AT2G02040.1 | NPF8.3  | Protein NRT1/ PTR FAMILY 8.3                          | 0.399 | 2.20E-16 | -                        |
| CCG012587.2 | AT1G73970.1 |         |                                                       | 0.385 | 5.75E-04 | -                        |
| CCG013195.1 | AT3G22830.1 | HSFA6B  | Heat stress transcription factor A-6b                 | 0.371 | 4.06E-10 | PeC-Pp; PeE-Pp           |
| CCG013358.1 | AT5G16770.1 |         |                                                       | 0.43  | 2.20E-16 | -                        |
| CCG013426.1 | AT3G50620.1 |         |                                                       | 0.549 | 2.20E-16 | -                        |
| CCG013427.1 | AT5G66815.1 |         |                                                       | 0.448 | 1.72E-12 | -                        |
| CCG013429.1 | AT2G23440.1 |         |                                                       | 0.573 | 1.87E-09 | -                        |
| CCG013430.1 | AT2G23440.1 |         |                                                       | 0.46  | 8.18E-12 | PeE-Pp                   |
| CCG013431.1 | AT5G66820.1 |         |                                                       | 0.359 | 2.20E-16 | -                        |
| CCG013531.1 | AT2G16750.1 |         |                                                       | 0.449 | 2.20E-16 | PeC-Pp; PeE-Pp           |
| CCG013539.1 | AT1G75950.1 | SKP1A   | SKP1-like protein 1A                                  | 0.518 | 8.18E-12 | -                        |
| CCG013576.1 | AT4G30210.1 | ATR2    | NADPH--cytochrome P450 reductase 2                    | 0.557 | 1.29E-12 | PeC-PeW; PeC-Pp          |
| CCG014164.1 | AT1G09910.1 |         |                                                       | 0.397 | 8.15E-03 | PeC-PeW; PeC-Pp; PeW-PeE |
| CCG014366.1 | AT5G45550.1 | MOB1A   | MOB kinase activator-like 1A                          | 1.115 | 2.52E-07 | -                        |
| CCG014403.1 | AT5G41380.1 |         |                                                       | 0.455 | 5.75E-04 | -                        |
| CCG014621.1 | AT3G21140.1 |         |                                                       | 0.392 | 3.20E-14 | -                        |
| CCG014824.1 | AT3G49940.1 | LBD38   | LOB domain-containing protein 38                      | 0.68  | 1.87E-09 | -                        |
| CCG015265.1 | AT5G47870.1 |         |                                                       | 0.444 | 2.13E-06 | -                        |
| CCG016281.1 | AT1G45688.1 |         |                                                       | 0.402 | 4.26E-05 | -                        |
| CCG016353.2 | -           |         |                                                       | 0.782 | 1.72E-12 | PeC-Pp                   |
| CCG016373.1 | AT2G28070.1 | ABCG3   | ABC transporter G family member 3                     | 0.431 | 2.11E-06 | -                        |
| CCG016375.1 | AT3G45040.1 | DOK1    | Dolichol kinase EVAN                                  | 0.383 | 4.70E-03 | -                        |
| CCG016662.1 | AT2G20990.3 | SYT1    | Synaptotagmin-1                                       | 0.364 | 2.20E-16 | -                        |
| CCG016825.1 | AT1G58250.2 |         |                                                       | 0.466 | 2.20E-16 | -                        |
| CCG017164.1 | AT2G20940.1 |         |                                                       | 0.382 | 2.20E-16 | -                        |
| CCG017184.1 | AT4G35000.1 | APX3    | L-ascorbate peroxidase 3, peroxisomal                 | 1.806 | 2.20E-16 | -                        |
| CCG017317.1 | AT4G34530.1 | CIB1    | Transcription factor bHLH63                           | 0.411 | 2.20E-16 | -                        |
| CCG017334.1 | AT4G34460.1 | GB1     | Guanine nucleotide-binding protein subunit beta       | 0.459 | 2.20E-16 | -                        |
| CCG017482.1 | AT4G34150.1 |         |                                                       | 0.358 | 7.64E-09 | PeC-PeW                  |
| CCG017483.2 | AT4G34160.1 | CYCD3-1 | Cyclin-D3-1                                           | 0.452 | 2.20E-16 | -                        |
| CCG017532.1 | AT2G14880.1 |         |                                                       | 0.65  | 2.20E-16 | -                        |
| CCG017536.1 | AT5G43400.1 |         |                                                       | 0.395 | 2.20E-16 | -                        |
| CCG017558.1 | AT4G33880.1 | RSL2    | Transcription factor bHLH85                           | 0.489 | 2.13E-06 | -                        |
| CCG017572.1 | AT3G49870.1 |         |                                                       | 0.455 | 4.26E-05 | -                        |
| CCG017594.2 | AT4G08170.2 | ITPK3   | Inositol-tetrakisphosphate 1-kinase 3                 | 0.356 | 1.29E-12 | -                        |
| CCG017598.1 | AT5G60440.1 | AGL62   | Agamous-like MADS-box protein AGL62                   | 0.459 | 2.20E-16 | PeC-PeE                  |
| CCG017854.1 | AT1G03170.1 | FAF2    | Protein FANTASTIC FOUR 2                              | 0.385 | 6.36E-04 | -                        |

|             |             |          |                                                             |       |          |                                     |
|-------------|-------------|----------|-------------------------------------------------------------|-------|----------|-------------------------------------|
| CCG018006.1 | AT3G14067.1 | SBT1.4   | Subtilisin-like protease SBT1.4                             | 0.676 | 2.20E-16 | -                                   |
| CCG018140.2 | AT5G24910.1 | CYP714A1 | Cytochrome P450 714A1                                       | 0.37  | 2.20E-16 | -                                   |
| CCG018730.1 | AT5G40490.1 | HLP1     |                                                             | 0.537 | 3.50E-14 | -                                   |
| CCG019053.1 | AT2G46040.1 | ARID1    | AT-rich interactive domain-containing protein 1             | 0.361 | 2.20E-16 | -                                   |
| CCG019459.1 | AT1G74960.2 | KAS2     | 3-oxoacyl-[acyl-carrier-protein] synthase II, chloroplastic | 0.394 | 2.20E-16 | -                                   |
| CCG019610.2 | AT2G14120.3 | DRP3B    | Dynamamin-related protein 3B                                | 0.767 | 2.20E-16 | PeC-PeW; PeC-Pp; PeW-PeE;<br>PeE-Pp |
| CCG019658.2 | AT5G09590.1 | HSP70    | Heat shock 70 kDa protein 10, mitochondrial                 | 0.376 | 7.64E-09 | PeC-PeW                             |
| CCG019662.1 | AT5G64420.1 |          |                                                             | 0.453 | 2.20E-16 | PeC-PeW; PeC-Pp                     |
| CCG019705.1 | -           |          |                                                             | 0.535 | 2.20E-16 | -                                   |
| CCG019725.1 | AT4G25210.1 | GEBPL    | GLABROUS1 enhancer-binding protein-like                     | 0.382 | 2.20E-16 | -                                   |
| CCG019726.1 | AT5G67500.2 | VDAC2    | Mitochondrial outer membrane protein porin 2                | 0.354 | 3.50E-14 | -                                   |
| CCG019881.1 | AT3G21670.1 | NPF6.4   | Protein NRT1/ PTR FAMILY 6.4                                | 0.409 | 2.20E-16 | PeC-PeW                             |
| CCG019959.1 | AT5G05610.1 | AL1      | PHD finger protein ALFIN-LIKE 1                             | 0.616 | 4.26E-05 | -                                   |
| CCG019960.1 | AT2G01060.1 | PHL7     | Myb family transcription factor PHL7                        | 0.354 | 1.26E-07 | -                                   |
| CCG020025.1 | AT2G22420.1 | PER17    | Peroxidase 17                                               | 0.366 | 1.62E-05 | -                                   |
| CCG020253.1 | AT3G14450.1 | CID9     | Polyadenylate-binding protein-interacting protein 9         | 0.382 | 1.87E-09 | -                                   |
| CCG020366.1 | AT1G17330.1 |          |                                                             | 0.468 | 2.60E-16 | -                                   |
| CCG020458.1 | AT2G40060.1 | CLC2     | Clathrin light chain 2                                      | 0.404 | 2.20E-16 | -                                   |
| CCG020475.1 | AT3G11260.1 | WOX5     | WUSCHEL-related homeobox 5                                  | 1.451 | 2.20E-16 | -                                   |
| CCG020560.1 | AT4G36920.1 | AP2      | Floral homeotic protein APETALA 2                           | 0.409 | 3.52E-16 | -                                   |
| CCG020695.1 | AT1G06330.1 |          |                                                             | 0.531 | 1.72E-12 | -                                   |
| CCG020711.1 | AT1G27340.1 | LCR      | F-box only protein 6                                        | 0.44  | 2.20E-16 | -                                   |
| CCG020739.1 | AT5G13140.1 |          |                                                             | 0.65  | 4.26E-05 | -                                   |
| CCG020746.1 | AT5G13180.1 | NAC083   | NAC domain-containing protein 83                            | 0.612 | 3.50E-14 | -                                   |
| CCG020747.1 | AT5G50850.1 | PDH2     |                                                             | 0.465 | 2.20E-16 | -                                   |
| CCG020749.1 | AT5G21090.1 |          |                                                             | 0.36  | 1.26E-07 | -                                   |
| CCG020776.1 | AT3G26618.1 | ERF1-3   | Eukaryotic peptide chain release factor subunit 1-3         | 0.558 | 2.20E-16 | -                                   |
| CCG020778.1 | AT1G66050.1 | ORTH5    | E3 ubiquitin-protein ligase ORTHRUS 5                       | 0.49  | 2.20E-16 | PeC-Pp; PeE-Pp                      |
| CCG021050.1 | -           |          |                                                             | 1.649 | 1.72E-12 | -                                   |
| CCG021060.1 | AT5G40990.1 | GLIP1    | GDSL esterase/lipase 1                                      | 0.376 | 2.48E-09 | -                                   |
| CCG021426.1 | AT5G63870.2 | PP7      | Serine/threonine-protein phosphatase 7                      | 0.351 | 2.20E-16 | PeC-Pp; PeE-Pp                      |
| CCG021427.1 | AT3G13780.1 |          |                                                             | 0.589 | 2.20E-16 | PeC-Pp; PeE-Pp                      |
| CCG021453.1 | -           |          |                                                             | 0.469 | 1.87E-09 | -                                   |
| CCG021668.1 | AT4G10750.1 |          |                                                             | 0.435 | 7.43E-05 | -                                   |
| CCG021702.1 | AT5G42050.1 |          |                                                             | 0.798 | 2.52E-07 | -                                   |
| CCG022019.1 | AT1G51720.1 |          |                                                             | 0.417 | 3.50E-14 | -                                   |
| CCG022442.1 | AT1G51760.1 | ILL4     | IAA-amino acid hydrolase ILR1-like 4                        | 2.048 | 2.52E-07 | PeC-Pp; PeE-Pp                      |
| CCG022605.1 | AT2G26170.1 | CYP711A1 | Cytochrome P450 711A1                                       | 0.502 | 2.20E-16 | -                                   |
| CCG022606.1 | AT2G26180.1 |          |                                                             | 0.386 | 4.65E-15 | PeE-Pp                              |
| CCG022649.1 | AT5G16320.1 | FRL1     | FRIGIDA-like protein 1                                      | 0.366 | 2.20E-16 | -                                   |
| CCG023204.1 | -           |          |                                                             | 0.361 | 8.18E-12 | -                                   |
| CCG023330.1 | AT1G30840.1 | PUP4     | Probable purine permease 4                                  | 0.561 | 2.20E-16 | -                                   |
| CCG023690.1 | AT1G07010.3 | SLP1     | Shewanella-like protein phosphatase 1                       | 0.72  | 2.20E-16 | -                                   |



|             |             |         |                                                              |       |          |                         |
|-------------|-------------|---------|--------------------------------------------------------------|-------|----------|-------------------------|
| CCG023830.1 | AT5G01020.1 |         | Serine/threonine-protein kinase At5g01020                    | 0.559 | 2.20E-16 | -                       |
| CCG024145.1 | AT1G56170.1 | NFYC2   | Nuclear transcription factor Y subunit C-2                   | 0.513 | 2.20E-16 | -                       |
| CCG024158.1 | AT5G11890.1 |         |                                                              | 0.349 | 2.20E-16 | -                       |
| CCG024228.1 | -           |         |                                                              | 0.409 | 2.20E-16 | -                       |
| CCG024379.1 | AT1G62850.2 |         |                                                              | 0.352 | 1.87E-09 | -                       |
| CCG024388.2 | AT4G22760.1 | PCMP-E6 | Pentatricopeptide repeat-containing protein At4g22760        | 0.389 | 2.80E-03 | -                       |
| CCG025109.1 | AT1G68620.1 | CXE6    | Probable carboxylesterase 6                                  | 0.683 | 2.20E-16 | -                       |
| CCG025151.2 | AT1G68690.1 | PERK9   | Proline-rich receptor-like protein kinase PERK9              | 0.409 | 2.20E-16 | -                       |
| CCG025153.1 | AT3G61460.1 |         |                                                              | 0.359 | 2.13E-06 | -                       |
| CCG025162.1 | AT1G13570.1 |         | F-box/FBD/LRR-repeat protein At1g13570                       | 0.369 | 8.18E-12 | -                       |
| CCG025241.3 | AT3G66654.1 | CYP21-4 | Peptidyl-prolyl cis-trans isomerase CYP21-4                  | 0.506 | 2.20E-16 | -                       |
| CCG025261.1 | AT5G49480.1 |         |                                                              | 0.409 | 3.50E-14 | -                       |
| CCG025277.1 | AT1G47980.1 |         |                                                              | 0.493 | 2.20E-16 | -                       |
| CCG025658.1 | -           |         |                                                              | 0.493 | 2.20E-16 | -                       |
| CCG026007.2 | AT2G01870.1 |         |                                                              | 1.22  | 1.72E-12 | PeC-PeW; PeC-Pp; PeE-Pp |
| CCG026259.1 | AT1G72490.1 |         |                                                              | 0.473 | 2.20E-16 | -                       |
| CCG026474.1 | AT5G39210.1 | CRR7    | Protein CHLORORESPIRATORY REDUCTION 7                        | 2.031 | 1.72E-12 | -                       |
| CCG026817.1 | AT2G41540.1 | GPDHC1  | Glycerol-3-phosphate dehydrogenase [NAD(+)] GPDHC1           | 0.754 | 2.52E-07 | -                       |
| CCG027462.1 | AT1G72760.1 |         |                                                              | 0.402 | 2.20E-16 | PeE-Pp                  |
| CCG027485.2 | AT1G36050.1 |         |                                                              | 0.445 | 3.20E-14 | -                       |
| CCG027486.1 | AT5G65140.1 | TPPJ    | Probable trehalose-phosphate phosphatase J                   | 0.63  | 1.26E-07 | -                       |
| CCG027500.1 | AT1G78170.1 |         |                                                              | 0.417 | 1.26E-07 | -                       |
| CCG027579.1 | AT5G49700.1 | AHL17   | AT-hook motif nuclear-localized protein 17                   | 0.592 | 2.20E-16 | -                       |
| CCG027827.1 | AT4G35600.2 |         | Probable serine/threonine-protein kinase Cx32, chloroplastic | 0.489 | 2.20E-16 | -                       |
| CCG028167.2 | AT2G17410.1 | ARID3   | AT-rich interactive domain-containing protein 3              | 0.353 | 2.20E-16 | -                       |
| CCG028333.1 | AT4G10590.2 | UBP9    | Ubiquitin carboxyl-terminal hydrolase 9                      | 0.364 | 2.20E-16 | -                       |
| CCG028575.1 | AT3G50240.1 | KIN4B   | Kinesin-like protein KIN-4B                                  | 0.379 | 6.99E-09 | PeC-PeW; PeC-Pp         |
| CCG029163.1 | AT2G25800.1 |         |                                                              | 0.535 | 1.40E-03 | -                       |
| CCG029166.1 | AT4G32810.1 | CCD8    | Carotenoid cleavage dioxygenase 8, chloroplastic             | 0.387 | 7.43E-05 | -                       |
| CCG029660.2 | AT1G64550.1 | ABCF3   | ABC transporter F family member 3                            | 0.353 | 2.20E-16 | -                       |
| CCG029692.1 | AT4G23910.1 |         |                                                              | 0.372 | 4.26E-05 | -                       |
| CCG029702.1 | AT4G23840.1 |         |                                                              | 0.378 | 2.20E-16 | -                       |
| CCG029732.1 | AT4G11160.1 |         |                                                              | 0.4   | 2.20E-16 | -                       |
| CCG029977.1 | AT4G29230.1 |         |                                                              | 0.522 | 2.20E-16 | -                       |
| CCG030309.1 | AT5G15210.1 | ZHD8    | Zinc-finger homeodomain protein 8                            | 0.487 | 2.80E-03 | -                       |
| CCG030670.2 | AT1G33490.1 |         |                                                              | 0.425 | 2.52E-07 | -                       |
| CCG030915.1 | AT3G48140.1 |         |                                                              | 1.425 | 1.87E-09 | -                       |
| CCG031189.1 | AT3G26935.1 | PAT07   | Probable protein S-acyltransferase 7                         | 0.375 | 2.20E-16 | -                       |
| CCG031270.1 | AT2G06050.2 | OPR3    | 12-oxophytodienoate reductase 3                              | 0.395 | 2.20E-16 | PeC-PeW; PeC-Pp; PeE-Pp |
| CCG031367.1 | AT5G07900.1 |         |                                                              | 0.368 | 4.06E-10 | -                       |
| CCG031432.1 | AT5G53090.1 |         |                                                              | 0.742 | 2.20E-16 | PeE-Pp                  |
| CCG031437.1 | AT1G80810.2 |         |                                                              | 0.429 | 2.20E-16 | PeC-PeE; PeC-Pp         |
| CCG031640.1 | AT4G32430.1 |         |                                                              | 0.481 | 2.20E-16 | PeC-Pp; PeE-Pp          |
| CCG032127.1 | AT4G32915.1 | GATC    |                                                              | 1.961 | 1.72E-12 | -                       |

|             |             |         |                                                  |       |          |                         |
|-------------|-------------|---------|--------------------------------------------------|-------|----------|-------------------------|
| CCG032293.2 | AT1G22860.1 |         |                                                  | 0.777 | 2.20E-16 | PeC-PeW; PeC-Pp; PeE-Pp |
| CCG032297.1 | AT5G54160.1 | OMT1    | Flavone 3'-O-methyltransferase 1                 | 0.349 | 1.87E-09 | PeC-Pp; PeW-Pp          |
| CCG032301.1 | AT1G10020.1 |         |                                                  | 0.512 | 2.20E-16 | -                       |
| CCG032484.1 | AT3G23940.1 | DHAD    | Dihydroxy-acid dehydratase, chloroplastic        | 0.37  | 2.20E-16 | -                       |
| CCG032488.1 | AT1G04780.1 |         |                                                  | 0.393 | 1.29E-12 | PeC-PeW                 |
| CCG032840.2 | AT4G32940.1 |         | Vacuolar-processing enzyme gamma-isozyme         | 0.374 | 2.20E-16 | -                       |
| CCG032890.1 | AT3G03860.1 | APRL5   | 5'-adenylylsulfate reductase-like 5              | 0.38  | 2.20E-16 | -                       |
| CCG032891.1 | AT5G18130.1 |         |                                                  | 0.66  | 2.20E-16 | -                       |
| CCG032986.1 | AT1G68660.1 | CPLS1   | ATP-dependent Clp protease adapter protein CLPS1 | 0.647 | 2.20E-16 | PeC-PeW; PeC-Pp; PeE-Pp |
| CCG032987.1 | AT4G21200.1 | GA2OX8  | Gibberellin 2-beta-dioxygenase 8                 | 0.378 | 3.20E-14 | PeE-Pp                  |
| CCG033061.1 | AT1G24764.1 | MAP70.2 | Microtubule-associated protein 70-2              | 0.398 | 2.20E-16 | -                       |
| CCG033066.1 | AT2G01690.2 | VAC14   | Protein VAC14 homolog                            | 0.405 | 2.20E-16 | -                       |
| CCG033619.1 | AT5G17060.1 |         |                                                  | 0.367 | 3.50E-14 | -                       |
| CCG033620.1 | AT3G03110.1 | XPO1B   | Protein EXPORTIN 1B                              | 0.541 | 2.20E-16 | -                       |
| CCG033885.1 | AT2G33490.1 |         | Uncharacterized protein At2g33490                | 0.508 | 2.20E-16 | PeC-PeW; PeC-Pp         |
| CCG033939.1 | AT1G09730.1 | ULP2B   | Probable ubiquitin-like-specific protease 2B     | 0.458 | 2.56E-12 | PeC-Pp; PeE-Pp          |
| CCG034082.1 | AT5G06300.1 | LOG7    |                                                  | 1.201 | 2.20E-16 | -                       |
| CCG034093.1 | AT5G39590.1 |         |                                                  | 0.353 | 2.20E-16 | -                       |
| CCG034094.1 | AT1G19860.1 |         | Zinc finger CCCH domain-containing protein 6     | 0.389 | 2.20E-16 | -                       |
| CCG034114.1 | AT1G75520.1 | SRS5    | Protein SHI RELATED SEQUENCE 5                   | 0.528 | 2.20E-16 | -                       |
| CCG034190.1 | AT1G67080.1 | ABA4    | Protein ABA DEFICIENT 4, chloroplastic           | 0.544 | 3.50E-14 | -                       |
| CCG034275.1 | AT1G77170.1 |         |                                                  | 0.497 | 2.20E-16 | -                       |

## PeW

|             |             |        |                                                        |       |          |        |
|-------------|-------------|--------|--------------------------------------------------------|-------|----------|--------|
| CCG000298.1 | AT5G36950.1 | DEGP10 | Protease Do-like 10, mitochondrial                     | 0.166 | 3.24E-03 | -      |
| CCG000327.3 | AT3G12760.1 |        |                                                        | 0.389 | 2.20E-16 | -      |
| CCG000332.1 | AT1G16280.1 | RH36   | DEAD-box ATP-dependent RNA helicase 36                 | 0.168 | 2.20E-16 | -      |
| CCG000356.1 | AT5G39660.1 | CDF2   | Cyclic dof factor 2                                    | 0.206 | 5.56E-04 | -      |
| CCG000860.1 | -           |        |                                                        | 0.265 | 1.17E-03 | -      |
| CCG001040.1 | AT5G50750.1 | RGP4   | Probable UDP-arabinopyranose mutase 4                  | 0.192 | 2.45E-08 | -      |
| CCG001041.1 | AT5G15810.1 |        | Probable tRNA (guanine(26)-N(2))-dimethyltransferase 1 | 0.366 | 2.20E-16 | PeW-Pp |
| CCG001174.1 | AT5G16150.1 |        | Plastidic glucose transporter 4                        | 0.236 | 2.20E-16 | -      |
| CCG001734.1 | AT2G21385.4 |        |                                                        | 0.212 | 2.20E-16 | -      |
| CCG001797.2 | AT2G21120.1 |        | Probable magnesium transporter NIPA6                   | 0.309 | 2.20E-16 | -      |
| CCG001935.1 | AT2G20820.2 |        |                                                        | 0.43  | 2.74E-12 | -      |
| CCG001942.1 | AT1G03530.1 |        |                                                        | 0.186 | 2.20E-16 | -      |
| CCG001946.1 | AT2G20840.1 | SCAMP1 | Secretory carrier-associated membrane protein 1        | 0.281 | 2.67E-16 | -      |
| CCG002048.1 | -           |        |                                                        | 0.192 | 2.20E-16 | -      |
| CCG002483.1 | ATMG00980.1 |        |                                                        | 0.398 | 2.67E-16 | -      |
| CCG002491.1 | AT2G34540.2 |        |                                                        | 0.78  | 1.17E-03 | -      |
| CCG002562.1 | AT5G62790.2 | DXR    | 1-deoxy-D-xylulose 5-phosphate reductoisomerase        | 0.196 | 2.20E-16 | -      |
| CCG002566.1 | AT5G14750.1 | MYB66  | Transcription factor MYB66                             | 0.428 | 2.20E-16 | PeW-Pp |
| CCG002653.1 | AT2G47140.1 | SDR3B  | Short-chain dehydrogenase reductase 3b                 | 0.315 | 1.90E-08 | -      |
| CCG003228.1 | AT5G60440.1 | AGL62  | Agamous-like MADS-box protein AGL62                    | 0.233 | 1.90E-08 | -      |

|             |             |        |                                             |       |          |                          |
|-------------|-------------|--------|---------------------------------------------|-------|----------|--------------------------|
| CCG003691.1 | AT1G63640.1 |        |                                             | 0.181 | 2.20E-16 | -                        |
| CCG003769.1 | AT1G70740.1 |        |                                             | 0.23  | 1.65E-06 | PeC-PeW; PeW-PeE         |
| CCG003889.3 | AT3G58490.1 | LPPD   | Lipid phosphate phosphatase delta           | 0.2   | 2.74E-12 | -                        |
| CCG004099.1 | AT2G32990.1 |        | Endoglucanase 11                            | 0.167 | 1.93E-12 | -                        |
| CCG004499.1 | AT2G21050.1 | LAX2   | Auxin transporter-like protein 2            | 0.188 | 1.51E-04 | -                        |
| CCG004578.1 | AT5G60910.1 | AGL8   | Agamous-like MADS-box protein AGL8          | 0.286 | 2.74E-12 | PeC-PeW; PeW-PeE         |
| CCG004846.1 | AT1G13980.1 | GN     | ARF guanine-nucleotide exchange factor GNOM | 0.27  | 2.20E-16 | -                        |
| CCG005158.1 | AT1G15460.1 | BOR4   | Boron transporter 4                         | 0.202 | 2.20E-16 | PeW-PeE; PeE-Pp          |
| CCG005453.1 | AT4G30220.2 |        | Probable small nuclear ribonucleoprotein F  | 1.267 | 1.17E-03 | -                        |
| CCG005511.1 | AT5G10770.1 |        | Aspartyl protease family protein At5g10770  | 0.215 | 5.31E-11 | PeC-PeW; PeW-PeE         |
| CCG005643.1 | AT5G54730.1 | ATG18F | Autophagy-related protein 18f               | 0.23  | 2.20E-16 | -                        |
| CCG005753.1 | -           |        |                                             | 0.251 | 2.20E-16 | -                        |
| CCG005795.1 | AT3G01170.1 |        |                                             | 0.217 | 2.74E-12 | -                        |
| CCG006205.1 | AT4G39530.1 |        |                                             | 0.211 | 2.20E-16 | -                        |
| CCG006206.1 | AT1G28380.1 | NSL1   | MACPF domain-containing protein NSL1        | 0.283 | 2.20E-16 | -                        |
| CCG006922.1 | AT3G26040.1 |        |                                             | 0.219 | 2.20E-16 | -                        |
| CCG007363.1 | AT1G70980.1 | SYNC3  | Asparagine--tRNA ligase, cytoplasmic 3      | 0.477 | 1.17E-03 | -                        |
| CCG007415.1 | AT1G02170.1 | AMC1   | Metacaspase-1                               | 0.245 | 1.50E-15 | -                        |
| CCG007498.1 | AT1G21410.1 | SKP2A  | F-box protein SKP2A                         | 0.281 | 1.90E-08 | -                        |
| CCG007698.1 | AT1G74160.1 |        |                                             | 0.209 | 2.20E-16 | -                        |
| CCG007699.1 | AT3G02160.1 |        |                                             | 0.374 | 2.20E-16 | -                        |
| CCG007711.1 | AT3G29400.1 |        |                                             | 0.214 | 2.20E-16 | PeW-Pp                   |
| CCG007712.1 | AT3G29400.1 |        |                                             | 0.433 | 2.20E-16 | PeW-Pp                   |
| CCG007713.1 | AT5G50380.1 |        |                                             | 0.277 | 2.20E-16 | PeW-Pp                   |
| CCG007716.1 | -           |        |                                             | 0.196 | 1.17E-03 | -                        |
| CCG007717.1 | AT5G15550.1 |        |                                             | 0.268 | 2.20E-16 | PeW-Pp                   |
| CCG007720.1 | AT5G39240.1 |        |                                             | 0.551 | 2.20E-16 | -                        |
| CCG007806.1 | AT4G14490.1 |        | FHA domain-containing protein At4g14490     | 0.2   | 2.20E-16 | -                        |
| CCG007936.1 | AT3G56370.1 | IRK    |                                             | 0.21  | 2.20E-16 | -                        |
| CCG008318.1 | AT5G65685.1 |        |                                             | 0.18  | 1.17E-03 | -                        |
| CCG008365.1 | AT5G60850.1 | DOF5.4 | Dof zinc finger protein DOF5.4              | 0.169 | 1.17E-03 | PeC-PeW; PeW-PeE         |
| CCG008620.1 | AT1G04360.1 | ATL1   | RING-H2 finger protein ATL1                 | 0.167 | 2.20E-16 | -                        |
| CCG009373.1 | AT2G19560.1 | EER5   | Enhanced ethylene response protein 5        | 0.337 | 2.20E-16 | PeC-PeW; PeW-PeE; PeW-Pp |
| CCG009434.1 | AT2G26110.1 |        |                                             | 0.205 | 2.20E-16 | -                        |
| CCG009539.1 | AT4G32760.2 |        |                                             | 0.169 | 2.20E-16 | -                        |
| CCG009656.1 | AT2G42000.2 | MT4A   | Metallothionein-like protein 4A             | 0.43  | 1.17E-03 | -                        |
| CCG009657.3 | AT1G20670.1 |        |                                             | 0.22  | 2.20E-16 | -                        |
| CCG009658.1 | AT4G38350.2 |        |                                             | 0.222 | 2.20E-16 | -                        |
| CCG010335.1 | AT1G55200.1 |        |                                             | 0.221 | 1.44E-04 | -                        |
| CCG011362.1 | -           |        |                                             | 0.94  | 2.74E-12 | -                        |
| CCG011363.1 | AT5G15720.1 | GLIP7  | GDSL esterase/lipase 7                      | 0.24  | 2.20E-16 | -                        |
| CCG011521.1 | AT5G66290.1 |        |                                             | 0.319 | 1.17E-03 | -                        |
| CCG011542.1 | AT2G26140.1 | FTSH4  | ATP-dependent zinc metalloprotease FTSH 4   | 0.207 | 2.20E-16 | -                        |
| CCG011554.1 | AT1G66920.2 |        |                                             | 0.23  | 2.20E-16 | -                        |

|             |             |         |                                            |       |          |                          |
|-------------|-------------|---------|--------------------------------------------|-------|----------|--------------------------|
| CCG011700.2 | AT1G54070.1 |         | Dormancy-associated protein homolog 4      | 0.425 | 2.20E-16 | -                        |
| CCG011708.1 | AT1G72370.1 | RPSAA   | 40S ribosomal protein Sa-1                 | 0.255 | 2.45E-05 | -                        |
| CCG011727.1 | AT1G72310.1 | ATL3    | RING-H2 finger protein ATL3                | 0.335 | 1.92E-07 | -                        |
| CCG012574.1 | AT5G16010.1 |         |                                            | 0.675 | 2.20E-16 | -                        |
| CCG012589.1 | AT5G20230.1 | BCB     | Blue copper protein                        | 0.196 | 2.74E-12 | -                        |
| CCG012591.1 | AT3G44110.1 | ATJ3    | Chaperone protein dnaJ 3                   | 0.452 | 2.20E-16 | -                        |
| CCG012592.1 | AT5G06490.1 | ATL71   | Putative RING-H2 finger protein ATL71      | 1.96  | 2.20E-16 | -                        |
| CCG013069.3 | AT2G19880.2 |         |                                            | 0.606 | 2.20E-16 | -                        |
| CCG013362.3 | AT5G36290.1 |         | GDT1-like protein 3                        | 0.168 | 1.17E-03 | PeC-PeW                  |
| CCG013393.1 | AT5G18700.1 | RUK     | Serine/threonine-protein kinase RUNKEL     | 0.239 | 1.49E-03 | PeC-PeW; PeW-PeE         |
| CCG014245.1 | AT4G12230.1 |         |                                            | 0.206 | 2.20E-16 | -                        |
| CCG014279.1 | AT5G47570.1 |         |                                            | 0.287 | 1.17E-03 | -                        |
| CCG014352.2 | AT3G49010.1 | RPL13B  | 60S ribosomal protein L13-1                | 0.376 | 2.67E-16 | -                        |
| CCG014357.1 | AT1G31880.1 | BRX     | Protein BREVIS RADIX                       | 0.21  | 1.65E-06 | -                        |
| CCG014441.1 | AT4G17920.1 | ATL29   | RING-H2 finger protein ATL29               | 0.206 | 1.65E-06 | -                        |
| CCG014442.1 | AT5G46690.1 | BHLH71  | Transcription factor bHLH71                | 0.193 | 2.20E-16 | -                        |
| CCG014445.1 | AT5G46700.1 | TRN2    | Protein TORNADO 2                          | 0.171 | 1.65E-06 | -                        |
| CCG014585.1 | AT3G16260.1 |         |                                            | 0.173 | 2.20E-16 | -                        |
| CCG014590.1 | AT1G10865.1 |         |                                            | 0.214 | 1.17E-03 | -                        |
| CCG014621.1 | AT3G21140.1 |         |                                            | 0.277 | 1.17E-03 | -                        |
| CCG014628.1 | AT1G50430.1 | DWF5    | 7-dehydrocholesterol reductase             | 0.197 | 3.99E-13 | -                        |
| CCG014629.1 | AT1G16810.1 |         |                                            | 0.363 | 1.90E-08 | PeW-Pp                   |
| CCG014749.1 | AT5G37310.1 | TMN4    | Transmembrane 9 superfamily member 4       | 0.342 | 2.20E-16 | -                        |
| CCG014792.1 | AT1G30640.1 |         |                                            | 0.212 | 2.20E-16 | -                        |
| CCG015096.3 | AT1G53310.1 | PPC1    | Phosphoenolpyruvate carboxylase 1          | 0.247 | 2.20E-16 | -                        |
| CCG015315.1 | AT4G10430.1 |         |                                            | 0.508 | 2.74E-12 | -                        |
| CCG016124.1 | AT5G27700.1 | RPS21C  | 40S ribosomal protein S21-2                | 1.643 | 1.17E-03 | -                        |
| CCG016185.1 | AT4G25800.1 | CBP60D  | Calmodulin-binding protein 60 D            | 0.373 | 2.45E-05 | -                        |
| CCG016633.1 | AT3G26040.1 |         |                                            | 0.172 | 3.10E-05 | -                        |
| CCG016647.1 | AT3G54840.1 | RABF1   | Ras-related protein RABF1                  | 0.333 | 2.67E-16 | -                        |
| CCG017091.1 | AT4G02750.1 |         |                                            | 0.467 | 1.90E-08 | -                        |
| CCG017093.1 | AT5G59810.1 | SBT5.4  | Subtilisin-like protease SBT5.4            | 0.179 | 3.99E-13 | -                        |
| CCG017110.1 | AT4G00710.1 |         |                                            | 0.413 | 2.20E-16 | PeC-PeW; PeW-PeE; PeW-Pp |
| CCG017143.1 | -           |         |                                            | 0.261 | 1.17E-03 | -                        |
| CCG017312.1 | AT3G17600.1 | IAA31   | Auxin-responsive protein IAA31             | 0.22  | 1.17E-03 | -                        |
| CCG017318.1 | AT1G75250.1 | RL6     | Protein RADIALIS-like 6                    | 0.257 | 2.20E-16 | -                        |
| CCG017411.1 | AT2G26520.1 |         |                                            | 1.83  | 2.74E-12 | -                        |
| CCG017482.1 | AT4G34150.1 |         |                                            | 0.216 | 2.20E-16 | PeC-PeW                  |
| CCG018329.1 | AT4G32150.1 | VAMP711 | Vesicle-associated membrane protein 711    | 0.188 | 2.45E-05 | -                        |
| CCG019515.1 | AT2G35930.1 | PUB23   | E3 ubiquitin-protein ligase PUB23          | 0.238 | 1.65E-06 | -                        |
| CCG019936.1 | AT1G10780.1 |         | F-box protein At1g10780                    | 0.242 | 1.76E-09 | -                        |
| CCG020355.1 | AT5G07720.1 | XXT3    | Probable xyloglucan 6-xylosyltransferase 3 | 0.21  | 1.17E-03 | PeC-PeW; PeC-Pp; PeW-PeE |
| CCG020363.1 | AT5G23130.1 |         |                                            | 0.18  | 1.51E-04 | -                        |
| CCG020471.1 | AT3G55830.1 | EPC1    | Glycosyltransferase family 64 protein C4   | 0.171 | 1.50E-15 | -                        |

|             |             |         |                                                          |       |          |                          |
|-------------|-------------|---------|----------------------------------------------------------|-------|----------|--------------------------|
| CCG020474.1 | AT2G39990.1 | TIF3F1  | Eukaryotic translation initiation factor 3 subunit F     | 0.2   | 1.50E-15 | -                        |
| CCG020487.1 | AT2G39920.1 |         | Uncharacterized protein At2g39920                        | 0.182 | 2.45E-05 | -                        |
| CCG020942.1 | AT3G03130.1 |         |                                                          | 0.268 | 2.20E-16 | PeW-PeE; PeW-Pp          |
| CCG020944.2 | AT5G17165.1 |         |                                                          | 0.367 | 1.90E-08 | PeW-PeE; PeW-Pp          |
| CCG020951.2 | AT5G16870.1 |         |                                                          | 0.171 | 1.17E-03 | -                        |
| CCG021011.1 | AT1G72570.1 | AIL1    | AP2-like ethylene-responsive transcription factor AIL1   | 0.193 | 2.20E-16 | -                        |
| CCG021041.1 | AT1G72450.1 | TIFY11B | Protein TIFY 11B                                         | 0.437 | 2.20E-16 | -                        |
| CCG021043.1 | AT3G14150.1 | GLO3    | Peroxisomal (S)-2-hydroxy-acid oxidase GLO3              | 0.272 | 1.17E-03 | -                        |
| CCG021158.1 | AT3G20940.1 |         |                                                          | 0.173 | 1.51E-04 | -                        |
| CCG021638.1 | AT1G13210.1 | ALA11   | Probable phospholipid-transporting ATPase 11             | 0.174 | 2.20E-16 | PeC-PeW                  |
| CCG021829.1 | AT1G63660.1 |         |                                                          | 0.278 | 2.20E-16 | -                        |
| CCG022132.1 | AT5G27110.1 |         |                                                          | 0.184 | 2.20E-16 | PeW-Pp                   |
| CCG022350.1 | AT1G04990.2 |         | Zinc finger CCCH domain-containing protein 3             | 0.184 | 2.20E-16 | PeC-PeW                  |
| CCG023064.1 | AT5G16420.1 |         |                                                          | 0.207 | 1.50E-15 | -                        |
| CCG023502.1 | AT2G03380.1 |         |                                                          | 0.204 | 2.20E-16 | -                        |
| CCG023504.1 | AT1G22400.1 | UGT85A1 | UDP-glycosyltransferase 85A1                             | 0.177 | 2.20E-16 | PeC-PeE                  |
| CCG023560.1 | AT3G57710.1 |         |                                                          | 0.177 | 2.20E-16 | -                        |
| CCG023669.2 | AT2G32400.1 | GLR5    |                                                          | 0.202 | 2.20E-16 | -                        |
| CCG024240.1 | AT5G22090.1 |         | Protein FAF-like, chloroplastic                          | 0.217 | 1.17E-03 | PeC-PeW; PeW-PeE         |
| CCG024383.1 | AT1G12330.1 |         |                                                          | 0.183 | 2.80E-08 | -                        |
| CCG024550.1 | AT5G61370.1 |         |                                                          | 0.178 | 2.20E-16 | -                        |
| CCG025286.1 | AT1G47990.1 | GA2OX4  | Gibberellin 2-beta-dioxygenase 4                         | 0.174 | 1.90E-08 | -                        |
| CCG025460.1 | AT1G16390.1 | 43011   | Organic cation/carnitine transporter 3                   | 0.193 | 1.65E-06 | -                        |
| CCG025514.1 | AT3G53180.1 |         |                                                          | 0.215 | 1.17E-03 | -                        |
| CCG025638.1 | AT5G11320.1 | YUC4    | Probable indole-3-pyruvate monooxygenase YUCCA4          | 0.232 | 2.20E-16 | -                        |
| CCG025886.1 | AT3G49500.1 | RDR6    | RNA-dependent RNA polymerase 6                           | 0.19  | 2.20E-16 | PeW-Pp; PeE-Pp           |
| CCG025980.1 | AT2G03500.1 | EFM     | Myb family transcription factor EFM                      | 0.185 | 2.20E-16 | -                        |
| CCG026125.2 | AT5G56180.1 | ARP8    | Actin-related protein 8                                  | 0.364 | 1.65E-06 | -                        |
| CCG026226.1 | AT1G61700.1 |         |                                                          | 0.283 | 2.20E-16 | -                        |
| CCG026337.2 | -           |         |                                                          | 0.258 | 1.90E-08 | PeC-PeW; PeW-PeE; PeE-Pp |
| CCG026699.1 | AT1G68020.2 | TPS6    | Alpha,alpha-trehalose-phosphate synthase [UDP-forming] 6 | 0.239 | 1.65E-06 | -                        |
| CCG026803.1 | AT5G19040.1 | IPT5    | Adenylate isopentenyltransferase 5, chloroplastic        | 1.189 | 1.17E-03 | PeC-PeW; PeC-Pp; PeW-PeE |
| CCG026828.1 | AT4G28390.1 | AAC3    | ADP,ATP carrier protein 3, mitochondrial                 | 1.722 | 1.17E-03 | -                        |
| CCG026862.1 | AT5G42260.1 | BGLU12  | Beta-glucosidase 12                                      | 0.516 | 2.20E-16 | PeC-PeW; PeW-Pp          |
| CCG027253.6 | AT3G26730.1 |         |                                                          | 0.312 | 1.51E-04 | -                        |
| CCG027260.1 | AT3G02130.1 | RPK2    | LRR receptor-like serine/threonine-protein kinase RPK2   | 0.171 | 3.27E-16 | -                        |
| CCG027408.2 | -           |         |                                                          | 0.329 | 1.90E-08 | -                        |
| CCG027437.1 | AT1G19270.1 | DA1     | Protein DA1                                              | 0.353 | 2.20E-16 | PeW-Pp                   |
| CCG027486.1 | AT5G65140.1 | TPPJ    | Probable trehalose-phosphate phosphatase J               | 0.174 | 2.74E-12 | -                        |
| CCG027495.1 | AT1G78160.1 | APUM7   | Putative pumilio homolog 7, chloroplastic                | 0.181 | 2.90E-14 | -                        |
| CCG027528.1 | AT5G10360.1 | RPS6B   | 40S ribosomal protein S6-2                               | 0.517 | 2.20E-16 | PeW-Pp                   |
| CCG027560.1 | AT1G28200.1 | FIP1    | GEM-like protein 1                                       | 0.215 | 1.65E-06 | PeE-Pp                   |
| CCG027597.1 | AT1G09960.1 | SUC4    | Sucrose transport protein SUC4                           | 0.242 | 2.20E-16 | PeW-Pp                   |
| CCG027598.1 | AT4G29140.1 | DTX51   | Protein DETOXIFICATION 51                                | 0.165 | 3.99E-13 | PeW-Pp                   |

|             |             |        |                                                            |       |          |                                     |
|-------------|-------------|--------|------------------------------------------------------------|-------|----------|-------------------------------------|
| CCG027795.1 | AT5G42680.1 |        |                                                            | 0.177 | 1.65E-06 | PeW-Pp                              |
| CCG027918.1 | AT3G60540.1 |        |                                                            | 0.266 | 2.74E-12 | -                                   |
| CCG027939.1 | AT3G60740.1 | TLCD   | Tubulin-folding cofactor D                                 | 0.395 | 2.67E-16 | -                                   |
| CCG027964.1 | AT2G45420.1 | LBD18  | LOB domain-containing protein 18                           | 0.169 | 1.90E-08 | -                                   |
| CCG028113.1 | AT1G31930.1 | XLG3   | Extra-large guanine nucleotide-binding protein 3           | 0.183 | 2.20E-16 | -                                   |
| CCG028159.1 | AT4G38220.2 |        |                                                            | 0.167 | 3.24E-03 | -                                   |
| CCG028227.1 | AT4G16447.1 |        |                                                            | 0.166 | 1.17E-03 | -                                   |
| CCG028236.1 | AT1G68020.2 | TPS6   | Alpha,alpha-trehalose-phosphate synthase [UDP-forming] 6   | 0.193 | 1.65E-06 | -                                   |
| CCG028331.1 | AT4G10610.1 | CID12  | Polyadenylate-binding protein-interacting protein 12       | 0.255 | 2.20E-16 | -                                   |
| CCG028336.1 | AT5G42110.1 |        |                                                            | 0.239 | 5.31E-11 | PeC-PeW; PeW-PeE; PeW-Pp            |
| CCG028337.1 | AT3G15850.1 |        |                                                            | 0.184 | 2.20E-16 | -                                   |
| CCG028353.1 | AT4G10490.1 | DLO2   | Protein DMR6-LIKE OXYGENASE 2                              | 0.504 | 2.74E-12 | PeW-Pp                              |
| CCG028396.1 | AT3G07580.2 |        |                                                            | 0.186 | 1.17E-03 | -                                   |
| CCG028680.1 | AT3G04750.1 |        |                                                            | 0.283 | 2.74E-12 | PeC-PeW; PeC-Pp                     |
| CCG028825.1 | AT2G17080.1 |        |                                                            | 0.422 | 2.20E-16 | PeC-PeW; PeW-Pp                     |
| CCG028874.1 | -           |        |                                                            | 2.514 | 1.17E-03 | -                                   |
| CCG028875.1 | AT3G29160.1 | KIN11  | SNF1-related protein kinase catalytic subunit alpha KIN11  | 0.323 | 2.74E-12 | -                                   |
| CCG029063.1 | AT2G46410.1 | CPC    | Transcription factor CPC                                   | 0.608 | 1.17E-03 | -                                   |
| CCG029166.1 | AT4G32810.1 | CCD8   | Carotenoid cleavage dioxygenase 8, chloroplastic           | 0.17  | 2.45E-08 | -                                   |
| CCG029264.1 | AT3G51490.2 | MSSP3  | Monosaccharide-sensing protein 3                           | 0.548 | 2.20E-16 | PeC-PeW; PeC-PeE; PeW-Pp;<br>PeE-Pp |
| CCG029265.1 | AT1G20830.1 | MCD1   | Protein MULTIPLE CHLOROPLAST DIVISION SITE 1               | 0.351 | 1.90E-08 | PeC-PeE; PeW-Pp; PeE-Pp             |
| CCG029726.1 | AT4G23760.1 |        |                                                            | 0.254 | 1.17E-03 | -                                   |
| CCG030167.1 | AT1G01320.1 |        |                                                            | 1.372 | 2.74E-12 | PeW-Pp                              |
| CCG030251.1 | AT5G25220.1 | KNAT3  | Homeobox protein knotted-1-like 3                          | 0.25  | 5.31E-11 | -                                   |
| CCG030280.1 | AT3G06035.1 |        | Uncharacterized GPI-anchored protein At3g06035             | 0.341 | 1.17E-03 | -                                   |
| CCG030328.1 | AT5G06600.1 | UBP12  | Ubiquitin carboxyl-terminal hydrolase 12                   | 0.178 | 2.45E-05 | -                                   |
| CCG030361.1 | AT2G35910.1 | ATL70  | RING-H2 finger protein ATL70                               | 0.187 | 1.17E-03 | -                                   |
| CCG030376.1 | AT2G35940.1 | BLH1   | BEL1-like homeodomain protein 1                            | 0.229 | 2.20E-16 | -                                   |
| CCG030814.1 | AT3G46780.1 | PTAC16 | Protein plastid transcriptionally active 16, chloroplastic | 0.169 | 2.90E-14 | -                                   |
| CCG031053.1 | AT5G12870.1 | MYB46  | Transcription factor MYB46                                 | 0.217 | 1.65E-06 | -                                   |
| CCG031057.1 | AT1G51350.1 |        |                                                            | 0.176 | 1.92E-07 | PeC-PeW                             |
| CCG031175.1 | AT3G62980.1 | TIR1   | Protein TRANSPORT INHIBITOR RESPONSE 1                     | 0.173 | 6.05E-03 | -                                   |
| CCG031258.1 | AT3G47600.1 |        |                                                            | 0.274 | 2.67E-16 | PeC-PeW                             |
| CCG031341.2 | AT1G74320.1 |        | Probable choline kinase 2                                  | 0.17  | 7.99E-14 | -                                   |
| CCG032085.1 | AT1G06490.1 | CALS7  | Callose synthase 7                                         | 0.196 | 2.20E-16 | -                                   |
| CCG032086.1 | AT4G21700.1 |        |                                                            | 0.339 | 2.20E-16 | -                                   |
| CCG032087.1 | AT2G33770.1 | UBC24  | Probable ubiquitin-conjugating enzyme E2 24                | 0.167 | 2.20E-16 | -                                   |
| CCG032313.1 | AT4G27280.1 |        |                                                            | 0.17  | 1.65E-06 | PeC-PeW; PeW-PeE; PeW-Pp            |
| CCG032560.1 | -           |        |                                                            | 0.211 | 2.20E-16 | PeW-Pp                              |
| CCG032579.1 | AT1G79660.1 |        |                                                            | 0.166 | 1.17E-03 | -                                   |
| CCG032642.1 | AT3G18830.1 | PLT5   | Polyol transporter 5                                       | 0.189 | 1.65E-06 | -                                   |
| CCG032688.1 | AT5G43580.1 |        |                                                            | 0.227 | 2.45E-05 | -                                   |
| CCG032846.1 | AT5G57340.2 |        |                                                            | 1.75  | 1.17E-03 | -                                   |

|             |             |         |                                                          |       |          |         |
|-------------|-------------|---------|----------------------------------------------------------|-------|----------|---------|
| CCG032914.1 | AT3G22430.1 |         |                                                          | 0.202 | 2.20E-16 | -       |
| CCG032916.1 | AT4G14910.2 | HISN5B  | Imidazoleglycerol-phosphate dehydratase 2, chloroplastic | 0.224 | 2.20E-16 | -       |
| CCG032917.2 | AT4G14920.1 |         |                                                          | 0.201 | 2.20E-16 | PeW-Pp  |
| CCG033044.2 | AT4G17720.1 |         |                                                          | 0.173 | 1.65E-06 | -       |
| CCG033165.1 | AT4G37370.1 |         |                                                          | 0.393 | 2.20E-16 | -       |
| CCG033437.1 | AT3G07390.1 |         |                                                          | 0.427 | 2.20E-16 | -       |
| CCG033549.1 | AT1G77700.1 |         |                                                          | 2.016 | 1.17E-03 | -       |
| CCG033671.1 | AT3G20640.1 | BHLH123 | Transcription factor bHLH123                             | 0.205 | 2.20E-16 | PeC-PeW |
| CCG034214.1 | AT3G29590.1 | 5MAT    |                                                          | 0.17  | 2.20E-16 | -       |

## Pp

|             |             |         |                                                       |       |          |                |
|-------------|-------------|---------|-------------------------------------------------------|-------|----------|----------------|
| CCG000166.1 | AT3G55800.1 |         | Sedoheptulose-1,7-bisphosphatase, chloroplastic       | 0.348 | 3.56E-06 | -              |
| CCG000168.1 | AT5G58910.1 | LAC16   | Laccase-16                                            | 0.234 | 2.20E-16 | -              |
| CCG000169.1 | AT3G11280.1 |         |                                                       | 0.276 | 2.20E-16 | -              |
| CCG000223.2 | AT2G40200.1 | BHLH51  | Transcription factor bHLH51                           | 0.218 | 2.20E-16 | -              |
| CCG000368.4 | AT1G26760.1 |         |                                                       | 0.255 | 2.20E-16 | PeW-Pp; PeE-Pp |
| CCG000387.1 | AT2G03340.1 | WRKY3   | Probable WRKY transcription factor 3                  | 0.267 | 2.20E-16 | -              |
| CCG000388.1 | AT1G13950.1 | ELF5A-1 | Eukaryotic translation initiation factor 5A-1         | 0.321 | 3.34E-11 | -              |
| CCG000389.1 | AT1G69400.1 | BUB3.3  | Mitotic checkpoint protein BUB3.3                     | 0.241 | 2.20E-16 | PeW-Pp         |
| CCG000391.2 | AT1G69390.1 | MINE1   | Cell division topological specificity factor homolog  | 0.227 | 2.20E-16 | PeW-Pp         |
| CCG001766.1 | AT4G34760.1 |         |                                                       | 1.022 | 3.34E-11 | -              |
| CCG002048.1 | -           |         |                                                       | 0.177 | 2.20E-16 | -              |
| CCG002483.1 | ATMG00980.1 |         |                                                       | 0.308 | 1.83E-04 | -              |
| CCG003880.1 | AT3G58070.1 | GIS     | Zinc finger protein GIS                               | 0.215 | 1.00E-15 | -              |
| CCG003977.1 | AT3G28857.1 | PRE5    | Transcription factor PRE5                             | 0.234 | 3.56E-06 | -              |
| CCG004079.1 | AT1G52560.1 | HSP26.5 | 26.5 kDa heat shock protein, mitochondrial            | 0.281 | 2.20E-16 | -              |
| CCG004882.1 | AT5G15460.1 | MUB2    | Membrane-anchored ubiquitin-fold protein 2            | 0.398 | 2.20E-16 | -              |
| CCG007600.1 | AT1G52565.1 |         |                                                       | 0.183 | 1.83E-04 | -              |
| CCG007687.1 | AT3G29290.1 | EMB2076 | Pentatricopeptide repeat-containing protein At3g29290 | 0.392 | 2.20E-16 | PeW-Pp         |
| CCG009705.1 | AT3G16480.1 | MPPA2   |                                                       | 0.181 | 2.20E-16 | -              |
| CCG009892.1 | AT5G45600.1 | GAS41   |                                                       | 0.818 | 3.34E-11 | PeW-Pp         |
| CCG012322.1 | AT5G56870.1 | BGAL4   | Beta-galactosidase 4                                  | 0.171 | 2.20E-16 | -              |
| CCG013906.1 | AT5G57030.1 | LUT2    | Lycopene epsilon cyclase, chloroplastic               | 0.178 | 2.20E-16 | PeC-PeE        |
| CCG014183.1 | AT5G18190.1 |         |                                                       | 0.18  | 2.20E-16 | -              |
| CCG014368.1 | AT5G45560.1 | EDR2L   | Protein ENHANCED DISEASE RESISTANCE 2-like            | 0.209 | 2.20E-16 | PeW-Pp         |
| CCG015757.2 | AT1G08070.1 |         |                                                       | 0.245 | 2.20E-16 | PeW-Pp; PeE-Pp |
| CCG015909.2 | AT2G19480.1 | NAP1;2  | Nucleosome assembly protein 1;2                       | 0.245 | 3.56E-06 | -              |
| CCG017318.1 | AT1G75250.1 | RL6     | Protein RADIALIS-like 6                               | 0.175 | 2.20E-16 | -              |
| CCG017962.1 | AT1G71240.1 |         |                                                       | 0.294 | 2.20E-16 | PeW-Pp; PeE-Pp |
| CCG017971.1 | AT3G56960.1 | PIP5K4  | Phosphatidylinositol 4-phosphate 5-kinase 4           | 0.198 | 2.20E-16 | -              |
| CCG018082.1 | AT5G50340.1 |         |                                                       | 0.19  | 2.20E-16 | -              |
| CCG019008.1 | AT3G61590.1 |         | F-box/kelch-repeat protein At3g61590                  | 0.356 | 2.20E-16 | -              |
| CCG019576.1 | -           |         |                                                       | 0.205 | 3.56E-06 | -              |
| CCG020063.2 | AT1G21610.3 |         |                                                       | 0.206 | 1.10E-11 | -              |

|             |             |         |                                                         |       |          |                |
|-------------|-------------|---------|---------------------------------------------------------|-------|----------|----------------|
| CCG020528.1 | AT3G53850.1 |         | CASP-like protein 5B2                                   | 0.262 | 2.20E-16 | -              |
| CCG020756.3 | AT5G13230.1 |         |                                                         | 0.434 | 2.20E-16 | PeW-Pp         |
| CCG023682.1 | -           |         |                                                         | 0.537 | 3.34E-11 | PeE-Pp         |
| CCG025143.1 | AT1G71960.1 | ABCG25  | ABC transporter G family member 25                      | 0.196 | 2.20E-16 | -              |
| CCG025144.1 | -           |         |                                                         | 0.354 | 2.20E-16 | -              |
| CCG025162.1 | AT1G13570.1 |         | F-box/FBD/LRR-repeat protein At1g13570                  | 0.336 | 2.20E-16 | -              |
| CCG025167.1 | AT1G13580.2 |         | LAG1 longevity assurance homolog 3                      | 0.537 | 2.20E-16 | -              |
| CCG025169.1 | AT3G13470.1 | CPN60B2 | Chaperonin 60 subunit beta 2                            | 0.273 | 2.20E-16 | PeW-Pp         |
| CCG025226.1 | AT3G06670.2 |         |                                                         | 0.188 | 2.20E-16 | PeW-Pp         |
| CCG025227.2 | AT4G16160.2 | OEP162  | Outer envelope pore protein 16-2                        | 0.29  | 2.20E-16 | -              |
| CCG025229.1 | AT4G16265.1 | NRPB9B  | DNA-directed RNA polymerases II, IV and V subunit 9B    | 0.279 | 3.34E-11 | PeE-Pp         |
| CCG025230.1 | AT2G29360.1 | SDR     | Tropinone reductase homolog At2g29360                   | 0.765 | 2.20E-16 | PeE-Pp         |
| CCG025245.1 | AT3G17040.1 | HCF107  | Protein high chlorophyll fluorescent 107                | 0.194 | 2.20E-16 | PeW-Pp         |
| CCG025251.1 | AT1G09570.1 | PHYA    | Phytochrome A                                           | 0.293 | 2.20E-16 | -              |
| CCG025286.1 | AT1G47990.1 | GA2OX4  | Gibberellin 2-beta-dioxygenase 4                        | 0.19  | 2.20E-16 | -              |
| CCG025287.1 | AT5G24460.1 |         |                                                         | 0.238 | 2.20E-16 | -              |
| CCG026334.1 | AT3G02150.2 | TCP13   | Transcription factor TCP13                              | 0.217 | 2.20E-16 | -              |
| CCG026974.1 | AT1G22030.1 |         |                                                         | 0.235 | 2.20E-16 | -              |
| CCG027524.1 | AT4G08960.1 |         |                                                         | 0.234 | 2.20E-16 | -              |
| CCG027598.1 | AT4G29140.1 | DTX51   | Protein DETOXIFICATION 51                               | 0.277 | 2.20E-16 | PeW-Pp         |
| CCG028345.1 | AT3G61460.1 |         |                                                         | 0.278 | 3.34E-11 | -              |
| CCG029543.1 | AT1G73250.1 | GER1    | GDP-L-fucose synthase 1                                 | 0.221 | 2.20E-16 | -              |
| CCG029619.1 | AT4G24150.1 | GRF8    | Growth-regulating factor 8                              | 0.205 | 2.20E-16 | -              |
| CCG029626.1 | AT1G14430.1 |         |                                                         | 0.252 | 2.20E-16 | PeW-Pp         |
| CCG029627.1 | AT2G46680.1 | ATHB-7  | Homeobox-leucine zipper protein ATHB-7                  | 0.312 | 2.20E-16 | PeW-Pp         |
| CCG029628.1 | AT1G26665.2 | MED10B  | Mediator of RNA polymerase II transcription subunit 10b | 0.439 | 2.20E-16 | PeW-Pp         |
| CCG029646.1 | -           |         |                                                         | 1.041 | 3.34E-11 | -              |
| CCG029648.1 | AT1G64625.1 | BHLH157 | Transcription factor bHLH157                            | 0.222 | 2.20E-16 | -              |
| CCG029649.1 | AT3G05675.2 |         | BTB/POZ domain-containing protein At3g05675             | 0.198 | 2.20E-16 | -              |
| CCG030167.1 | AT1G01320.1 |         |                                                         | 1.363 | 3.34E-11 | PeW-Pp         |
| CCG030227.1 | AT5G58030.1 |         |                                                         | 0.271 | 2.20E-16 | -              |
| CCG030296.1 | AT5G56770.1 | ET3     | Protein EFFECTOR OF TRANSCRIPTION 3                     | 0.204 | 2.20E-16 | PeW-Pp         |
| CCG030309.1 | AT5G15210.1 | ZHD8    | Zinc-finger homeodomain protein 8                       | 0.26  | 2.20E-16 | -              |
| CCG032519.1 | AT5G10970.1 |         |                                                         | 0.243 | 2.20E-16 | -              |
| CCG032524.1 | AT1G80760.1 | NIP6-1  | Aquaporin NIP6-1                                        | 0.75  | 2.20E-16 | PeW-Pp         |
| CCG033618.1 | AT3G21330.1 | BHLH87  | Transcription factor bHLH87                             | 0.242 | 2.20E-16 | -              |
| CCG033877.1 | AT5G15100.1 | PIN8    | Auxin efflux carrier component 8                        | 0.199 | 2.20E-16 | -              |
| CCG033880.1 | AT3G28720.1 |         |                                                         | 0.2   | 2.20E-16 | -              |
| CCG033936.1 | AT5G25370.1 |         | Phospholipase D alpha 3                                 | 0.249 | 2.20E-16 | -              |
| CCG034089.1 | AT1G19850.1 | IAA24   | Auxin response factor 5                                 | 0.295 | 2.20E-16 | PeW-Pp; PeE-Pp |
| CCG034090.1 | AT3G27230.1 |         |                                                         | 0.248 | 2.20E-16 | PeW-Pp; PeE-Pp |



**Table S9:** Results from Gene Ontology enrichment analysis for PSGs.

| GO ID      | GO name                                                                  | Ontology | PSGs | Annotated | P-value  | FDR      |
|------------|--------------------------------------------------------------------------|----------|------|-----------|----------|----------|
| <b>PeC</b> |                                                                          |          |      |           |          |          |
| GO:0060776 | simple leaf morphogenesis                                                | BP       | 1    | 3         | 4.39E-11 | 1.22E-09 |
| GO:0060968 | regulation of gene silencing                                             | BP       | 1    | 8         | 1.96E-05 | 2.21E-04 |
| GO:0009688 | abscisic acid biosynthetic process                                       | BP       | 1    | 11        | 2.80E-04 | 2.38E-03 |
| GO:0048467 | gynoecium development                                                    | BP       | 1    | 13        | 8.88E-04 | 6.76E-03 |
| GO:0016114 | terpenoid biosynthetic process                                           | BP       | 3    | 102       | 1.43E-03 | 1.05E-02 |
| GO:0048438 | floral whorl development                                                 | BP       | 1    | 15        | 2.13E-03 | 1.44E-02 |
| GO:0010073 | meristem maintenance                                                     | BP       | 1    | 17        | 4.22E-03 | 2.74E-02 |
| GO:0009631 | cold acclimation                                                         | BP       | 1    | 19        | 7.34E-03 | 4.36E-02 |
| GO:0015205 | nucleobase transmembrane transporter activity                            | MF       | 2    | 15        | 4.60E-10 | 1.24E-08 |
| GO:0019207 | kinase regulator activity                                                | MF       | 2    | 42        | 3.54E-04 | 2.98E-03 |
| GO:0016653 | oxidoreductase activity                                                  | MF       | 1    | 15        | 2.13E-03 | 1.44E-02 |
| <b>PeW</b> |                                                                          |          |      |           |          |          |
| GO:0048765 | root hair cell differentiation                                           | BP       | 3    | 26        | 2.88E-11 | 1.18E-09 |
| GO:0048764 | trichoblast maturation                                                   | BP       | 3    | 26        | 2.88E-11 | 1.18E-09 |
| GO:2000024 | regulation of leaf development                                           | BP       | 1    | 4         | 3.73E-08 | 5.77E-07 |
| GO:0021700 | developmental maturation                                                 | BP       | 4    | 68        | 1.02E-07 | 1.49E-06 |
| GO:0010087 | phloem or xylem histogenesis                                             | BP       | 4    | 72        | 2.68E-07 | 3.81E-06 |
| GO:0048364 | root development                                                         | BP       | 7    | 223       | 2.83E-06 | 3.43E-05 |
| GO:0048856 | anatomical structure development                                         | BP       | 19   | 1276      | 7.42E-05 | 5.46E-04 |
| GO:0010118 | stomatal movement                                                        | BP       | 2    | 36        | 2.78E-04 | 1.88E-03 |
| GO:0070887 | cellular response to chemical stimulus                                   | BP       | 11   | 677       | 9.83E-04 | 5.25E-03 |
| GO:0010229 | inflorescence development                                                | BP       | 1    | 13        | 1.94E-03 | 9.43E-03 |
| GO:0048440 | carpel development                                                       | BP       | 1    | 16        | 5.88E-03 | 2.52E-02 |
| GO:0005769 | early endosome                                                           | CC       | 2    | 17        | 4.16E-08 | 6.34E-07 |
| GO:0090406 | pollen tube                                                              | CC       | 2    | 31        | 7.21E-05 | 5.34E-04 |
| <b>Pp</b>  |                                                                          |          |      |           |          |          |
| GO:0003156 | regulation of organ formation                                            | BP       | 1    | 2         | 2.20E-16 | 8.19E-15 |
| GO:0010026 | trichome differentiation                                                 | BP       | 1    | 18        | 1.75E-05 | 1.48E-04 |
| GO:0048510 | regulation of timing of transition from vegetative to reproductive phase | BP       | 1    | 21        | 7.52E-05 | 5.79E-04 |
| GO:0055072 | iron ion homeostasis                                                     | BP       | 1    | 22        | 1.13E-04 | 8.48E-04 |
| GO:0009880 | embryonic pattern specification                                          | BP       | 1    | 26        | 4.23E-04 | 2.87E-03 |
| GO:0048507 | meristem development                                                     | BP       | 1    | 28        | 7.18E-04 | 4.54E-03 |
| GO:0009583 | detection of light stimulus                                              | BP       | 1    | 29        | 9.12E-04 | 5.41E-03 |
| GO:0010305 | leaf vascular tissue pattern formation                                   | BP       | 1    | 36        | 3.41E-03 | 1.57E-02 |
| GO:0009881 | photoreceptor activity                                                   | MF       | 1    | 8         | 1.47E-10 | 2.66E-09 |
| GO:0016679 | oxidoreductase activity                                                  | MF       | 2    | 100       | 6.98E-04 | 4.54E-03 |
| GO:0008135 | translation factor activity                                              | MF       | 3    | 206       | 7.72E-04 | 4.79E-03 |

**Table S10:** List of PSGs with putative function associated with ecological and morphological divergence between lineages.

| Gene ID                                                                  | Best Arabidopsis hit | Gene Name | References |
|--------------------------------------------------------------------------|----------------------|-----------|------------|
| <b>Genes related to trichome differentiation and branching</b>           |                      |           |            |
| CCG003880.1                                                              | AT3G58070.1          | GIS       | (35, 36)   |
| CCG002566.1                                                              | AT5G14750.1          | MYB66     | (37-39)    |
| CCG029063.1                                                              | AT2G46410.1          | CPC       | (40, 41)   |
| CCG017558.1                                                              | AT4G33880.1          | RSL2      | (42)       |
| <b>Genes involved in regulation of leaf development and morphology</b>   |                      |           |            |
| CCG026334.1                                                              | AT3G02150.2          | TCP13     | (43, 44)   |
| CCG020711.1                                                              | AT1G27340.1          | LCR       | (45, 46)   |
| CCG025886.1                                                              | AT3G49500.1          | RDR6      | (47)       |
| CCG010761.1                                                              | AT2G46310.1          | CRF5      | (48)       |
| CCG025638.1                                                              | AT5G11320.1          | YUC4      | (49)       |
| CCG014445.1                                                              | AT5G46700.1          | TRN2      | (50)       |
| CCG020746.1                                                              | AT5G13180.1          | NAC083    | (51, 52)   |
| CCG034089.1                                                              | AT1G19850.1          | IAA24     | (53)       |
| <b>Genes associated with flowering time</b>                              |                      |           |            |
| CCG025980.1                                                              | AT2G03500.1          | EFM       | (54)       |
| CCG018730.1                                                              | AT5G40490.1          | HLP1      | (55)       |
| CCG017317.1                                                              | AT4G34530.1          | CIB1      | (56)       |
| CCG009892.1                                                              | AT5G45600.1          | GAS41     | (57, 58)   |
| <b>Genes associated with anther development</b>                          |                      |           |            |
| CCG027260.1                                                              | AT3G02130.1          | RPK2      | (59)       |
| <b>Genes associated with pollen tube growth and guidance</b>             |                      |           |            |
| CCG023669.2                                                              | AT2G32400.1          | GLR5      | (60)       |
| CCG017971.1                                                              | AT3G56960.1          | PIP5K4    | (61)       |
| CCG016375.1                                                              | AT3G45040.1          | DOK1      | (62, 63)   |
| <b>Genes involved in the development of male and female gametophytes</b> |                      |           |            |
| CCG019053.1                                                              | AT2G46040.1          | ARID1     | (64, 65)   |
| CCG033877.1                                                              | AT5G15100.1          | PIN8      | (66)       |
| CCG032484.1                                                              | AT3G23940.1          | DHAD      | (67)       |
| CCG000332.1                                                              | AT1G16280.1          | RH36      | (68)       |

## ***SI References***

1. Wang J, et al. (2014) Speciation of two desert poplar species triggered by Pleistocene climatic oscillations. *Heredity* 112(2):156–164.
2. Wang J, et al. (2011) Genetic differentiation and delimitation between ecologically diverged *Populus euphratica* and *P. pruinosa*. *PLOS ONE* 6(10):e26530.
3. Ma T, et al. (2013) Genomic insights into salt adaptation in a desert poplar. *Nat Commun* 4:2797.
4. Li H, Durbin R (2009) Fast and accurate short read alignment with Burrows-Wheeler transform. *Bioinformatics* 25(14):1754–1760.
5. Li H, et al. (2009) The Sequence Alignment/Map format and SAMtools. *Bioinformatics* 25(16):2078–2079.
6. DePristo MA, et al. (2011) A framework for variation discovery and genotyping using next-generation DNA sequencing data. *Nat Genet* 43(5):491–498.
7. Li H (2011) A statistical framework for SNP calling, mutation discovery, association mapping and population genetical parameter estimation from sequencing data. *Bioinformatics* 27(21):2987–2993.
8. Korneliussen TS, Albrechtsen A, Nielsen R (2014) ANGSD: Analysis of Next Generation Sequencing Data. *BMC bioinform* 15:356.
9. Kim SY, et al. (2011) Estimation of allele frequency and association mapping using next-generation sequencing data. *BMC bioinform* 12.
10. Nielsen R, Korneliussen T, Albrechtsen A, Li Y, Wang J (2012) SNP calling, genotype calling, and sample allele frequency estimation from New-Generation Sequencing data. *PLOS ONE* 7(7):e37558.
11. Browning SR, Browning BL (2007) Rapid and accurate haplotype phasing and missing-data inference for whole-genome association studies by use of localized haplotype clustering. *Am J Hum Genet* 81(5):1084–1097.
12. Browning BL, Browning SR (2013) Improving the accuracy and efficiency of identity-by-descent detection in population data. *Genetics* 194(2):459–471.
13. Manichaikul A, et al. (2010) Robust relationship inference in genome-wide association studies. *Bioinformatics* 26(22):2867–2873.
14. Bryant D, Moulton V (2004) Neighbor-net: an agglomerative method for the construction of phylogenetic networks. *Mol Biol Evol* 21(2):255–265.
15. Huson DH, Bryant D (2006) Application of phylogenetic networks in evolutionary studies. *Mol Biol Evol* 23(2):254–267.
16. Tamura K, et al. (2011) MEGA5: molecular evolutionary genetics analysis using maximum likelihood, evolutionary distance, and maximum parsimony methods. *Mol Biol Evol* 28(10):2731–2739.
17. Patterson N, Price AL, Reich D (2006) Population structure and eigenanalysis. *PLOS Genet* 2(12):e190.
18. Skotte L, Korneliussen TS, Albrechtsen A (2013) Estimating individual admixture proportions from next generation sequencing data. *Genetics* 195(3):693–702.
19. Pickrell JK, Pritchard JK (2012) Inference of population splits and mixtures from genome-wide allele frequency data. *PLOS Genet* 8(11):e1002967.
20. Li H, Durbin R (2011) Inference of human population history from individual whole-genome

- sequences. *Nature* 475(7357):493–496.
21. Wang J, Street NR, Scofield DG, Ingvarsson PK (2016) Variation in linked selection and recombination drive genomic divergence during allopatric speciation of European and American aspens. *Mol Biol Evol* 33(7):1754–1767.
  22. Excoffier L, Dupanloup I, Huerta-Sanchez E, Sousa VC, Foll M (2013) Robust demographic inference from genomic and SNP data. *PLoS Genet* 9(10):e1003905.
  23. Barrett JC (2009) Haploview: Visualization and analysis of SNP genotype data. *Cold Spring Harbor protocols* 2009(10):pdb ip71.
  24. McVean GA, et al. (2004) The fine-scale structure of recombination rate variation in the human genome. *Science* 304(5670):581–584.
  25. Korneliussen TS, Moltke I, Albrechtsen A, Nielsen R (2013) Calculation of Tajima's *D* and other neutrality test statistics from low depth next-generation sequencing data. *BMC bioinform* 14.
  26. Fumagalli M, et al. (2013) Quantifying population genetic differentiation from next-generation sequencing data. *Genetics* 195(3):979–992.
  27. Fumagalli M, Vieira FG, Linderoth T, Nielsen R (2014) ngsTools: methods for population genetics analyses from next-generation sequencing data. *Bioinformatics* 30(10):1486–1487.
  28. Ewing G, Hermisson J (2010) *MSMS*: a coalescent simulation program including recombination, demographic structure and selection at a single locus. *Bioinformatics* 26(16):2064–2065.
  29. Hudson RR, Kreitman M, Aguade M (1987) A test of neutral molecular evolution based on nucleotide data. *Genetics* 116(1):153–159.
  30. Yi X, et al. (2010) Sequencing of 50 human exomes reveals adaptation to high altitude. *Science* 329(5987):75–78.
  31. Liu S, et al. (2014) Population genomics reveal recent speciation and rapid evolutionary adaptation in polar bears. *Cell* 157(4):785–794.
  32. Conesa A, Gotz S (2008) Blast2GO: A comprehensive suite for functional analysis in plant genomics. *Int J Plant Genomics* 2008:619832.
  33. Benjamini Y, Hochberg Y (1995) Controlling the false discovery rate: a practical and powerful approach to multiple testing. *Journal of the royal statistical society. Series B (Methodological)*:289–300.
  34. Liu X, Wang Z, Shao W, Ye Z, Zhang J (2016) Phylogenetic and taxonomic status analyses of the Abaso section from multiple nuclear genes and plastid fragments reveal new insights into the north America origin of *Populus* (Salicaceae). *Frontiers Plant Sci* 7:2022.
  35. Gan Y, et al. (2006) GLABROUS INFLORESCENCE STEMS modulates the regulation by gibberellins of epidermal differentiation and shoot maturation in *Arabidopsis*. *Plant Cell* 18(6):1383–1395.
  36. Sun L, et al. (2015) GLABROUS INFLORESCENCE STEMS3 (GIS3) regulates trichome initiation and development in *Arabidopsis*. *New Phytologist* 206(1):220–230.
  37. Ishida T, et al. (2007) *Arabidopsis* TRANSPARENT TESTA GLABRA2 is directly regulated by R2R3 MYB transcription factors and is involved in regulation of GLABRA2 transcription in epidermal differentiation. *Plant Cell* 19(8):2531–2543.
  38. Seo E, et al. (2011) WEREWOLF, a regulator of root hair pattern formation, controls flowering time through the regulation of FT mRNA stability. *Plant Physiology* 156(4):1867–1877.
  39. Pesch M, Hülskamp M. (2004) Creating a two-dimensional pattern *de novo* during *Arabidopsis*

- trichome and root hair initiation. *Current opinion in genetics & development* 14(4):422-427.
40. Schellmann S, et al. (2002) TRIPTYCHON and CAPRICE mediate lateral inhibition during trichome and root hair patterning in *Arabidopsis*. *The EMBO journal* 21(19):5036-5046.
  41. Digiuni S, et al. (2008) A competitive complex formation mechanism underlies trichome patterning on *Arabidopsis* leaves. *Molecular Systems Biology* 4(1):217.
  42. Yi K, et al. (2010) A basic helix-loop-helix transcription factor controls cell growth and size in root hairs. *Nature Genetics* 42(3):264-267.
  43. Koyama T, Furutani M, Tasaka M, Ohme-Takagi M (2007) TCP transcription factors control the morphology of shoot lateral organs via negative regulation of the expression of boundary-specific genes in *Arabidopsis*. *Plant Cell* 19(2):473-484.
  44. Koyama T, Mitsuda N, Seki M, Shinozaki K, Ohme-Takagi M (2010) TCP transcription factors regulate the activities of ASYMMETRIC LEAVES1 and miR164, as well as the auxin response, during differentiation of leaves in *Arabidopsis*. *Plant Cell* 22(11):3574-3588.
  45. Song JB, Huang SQ, Dalmay T, Yang ZM (2012) Regulation of leaf morphology by microRNA394 and its target LEAF CURLING RESPONSIVENESS. *Plant Cell Physiol* 53(7):1283-1294.
  46. Song JB, et al. (2013) miR394 and LCR are involved in *Arabidopsis* salt and drought stress responses in an abscisic acid-dependent manner. *BMC Plant Biol* 13:210.
  47. Adenot X, et al. (2006) DRB4-dependent TAS3 trans-acting siRNAs control leaf morphology through AGO7. *Current Biology* 16(9):927-932.
  48. Rashotte A, et al. (2006) A subset of *Arabidopsis* AP2 transcription factors mediates cytokinin responses in concert with a two-component pathway. *Proceedings of the National Academy of Sciences* 103(29):11081-11085.
  49. Cheng Y, Dai X, Zhao Y. (2007) Auxin synthesized by the YUCCA flavin monooxygenases is essential for embryogenesis and leaf formation in *Arabidopsis*. *Plant Cell* 19(8):2430-2439.
  50. Cnops G, et al. (2006) The TORNADO1 and TORNADO2 genes function in several patterning processes during early leaf development in *Arabidopsis thaliana*. *Plant Cell* 18(4):852-866.
  51. Seo P, Park C. (2011) Signaling linkage between environmental stress resistance and leaf senescence in *Arabidopsis*. *Plant signaling & behavior* 6(10):1564-1566.
  52. Yang S, et al. (2011) The *Arabidopsis* NAC transcription factor VNI2 integrates abscisic acid signals into leaf senescence via the COR/RD genes. *Plant Cell* 23(6):2155-2168.
  53. Krogan N, et al. Deletion of MP/ARF5 domains III and IV reveals a requirement for Aux/IAA regulation in *Arabidopsis* leaf vascular patterning. *New Phytologist* 194(2):391-401.
  54. Yan Y, et al. (2014) A MYB-domain protein EFM mediates flowering responses to environmental cues in *Arabidopsis*. *Developmental cell* 30(4):437-448.
  55. Zhang Y, et al. (2015) Integrative genome-wide analysis reveals HLP1, a novel RNA-binding protein, regulates plant flowering by targeting alternative polyadenylation. *Cell research* 25(7):864.
  56. Liu Y, et al. (2013) Multiple bHLH proteins form heterodimers to mediate CRY2-dependent regulation of flowering-time in *Arabidopsis*. *PLoS genetics* 9(10):e1003861.
  57. Su Y, et al. (2017) Phosphorylation of Histone H2A at Serine 95: A Plant-specific Mark Involved in Flowering Time Regulation and H2A. *Z Deposition*. *Plant Cell*: tpc.00266.2017.
  58. Zacharaki V, et al. (2012) The *Arabidopsis* ortholog of the YEATS domain containing protein YAF9a regulates flowering by controlling H4 acetylation levels at the FLC locus. *Plant science*

- 196:44-52.
59. Zhao D. (2009) Control of anther cell differentiation: a teamwork of receptor-like kinases. *Sexual plant reproduction* 22(4):221-228.
  60. Michard E, et al. (2011) Glutamate receptor-like genes form Ca<sup>2+</sup> channels in pollen tubes and are regulated by pistil D-serine. *Science* 332(6028):434-437.
  61. Sousa E, Kost B, Malhó R. (2008) *Arabidopsis* phosphatidylinositol-4-monophosphate 5-kinase 4 regulates pollen tube growth and polarity by modulating membrane recycling. *Plant Cell* 20(11):3050-3064.
  62. Cho Y, et al. (2017) *Arabidopsis* dolichol kinase AtDOK1 is involved in flowering time control. *Journal of Experimental Botany* erx095.
  63. Kanehara K, et al. (2015) *Arabidopsis* DOK1 encodes a functional dolichol kinase involved in reproduction. *Plant Journal* 81(2):292-303.
  64. Li L, et al. (2017) A reciprocal inhibition between ARID1 and MET1 in male and female gametes in *Arabidopsis*. *Journal of Integrative Plant Biology*.
  65. Zheng B, et al. (2014) An ARID domain-containing protein within nuclear bodies is required for sperm cell formation in *Arabidopsis thaliana*. *PLoS genetics* 10(7):e1004421.
  66. Ding Z, et al. (2012) ER-localized auxin transporter PIN8 regulates auxin homeostasis and male gametophyte development in *Arabidopsis*. *Nature communications* 3:941.
  67. Zhang C, et al. (2014) Dihydroxyacid dehydratase is important for gametophyte development and disruption causes increased susceptibility to salinity stress in *Arabidopsis*. *Journal of experimental botany* 66(3):879-888.
  68. Huang C K, et al. (2010) A DEAD-box protein, AtRH36, is essential for female gametophyte development and is involved in rRNA biogenesis in *Arabidopsis*. *Plant and cell physiology* 51(5):694-706.
